# Supplementary material
Source: publisher figshare collection journal article supplement (https://acs.figshare.com/ndownloader/files/3746962)
Supplement: Supplementary file 1 [file 3746962]

data_complex1
_vrf_PLAT222_complex1
;
PROBLEM:  Large Non-Solvent  H     Uiso(max)/Uiso(min) ...       10.0 Ratio
RESPONSE:  Butyl groups were found to be disordered; see
           _publ_section_exptl_refinement
;
 _vrf_PLAT234_complex1
;
PROBLEM:  Large Hirshfeld Difference C13 -- C15 .. 0.53 Ang.
RESPONSE:  Butyl group containing the C13, C14, C15 was found to be disordered; see
           _publ_section_exptl_refinement
;
 _vrf_PLAT241_complex1
;
PROBLEM:  High Ueq as Compared to Neighbors for ..... C14 Check.
RESPONSE:  Butyl groups were found to be disordered; see
           _publ_section_exptl_refinement
;
_audit_creation_method            SHELXL-97
_chemical_name_systematic
;
 ?
;
_chemical_name_common             ?
_chemical_melting_point           ?
_chemical_formula_moiety          'C54 H88 Cr2 O14 Sn4'
_chemical_formula_sum
 'C54 H88 Cr2 O14 Sn4'
_chemical_formula_weight          1540.08
 
loop_
 _atom_type_symbol
 _atom_type_description
 _atom_type_scat_dispersion_real
 _atom_type_scat_dispersion_imag
 _atom_type_scat_source
 'C'  'C'   0.0033   0.0016
 'International Tables Vol C Tables 4.2.6.8 and 6.1.1.4'
 'H'  'H'   0.0000   0.0000
 'International Tables Vol C Tables 4.2.6.8 and 6.1.1.4'
 'O'  'O'   0.0106   0.0060
 'International Tables Vol C Tables 4.2.6.8 and 6.1.1.4'
 'Cr'  'Cr'   0.3209   0.6236
 'International Tables Vol C Tables 4.2.6.8 and 6.1.1.4'
 'Sn'  'Sn'  -0.6537   1.4246
 'International Tables Vol C Tables 4.2.6.8 and 6.1.1.4'
 
_symmetry_cell_setting            'monoclinic'
_symmetry_space_group_name_H-M    'P 21/c'
 _symmetry_space_group_name_Hall '-P 2ybc'
loop_
 _symmetry_equiv_pos_as_xyz
 'x, y, z'
 '-x, y+1/2, -z+1/2'
 '-x, -y, -z'
 'x, -y-1/2, z-1/2'
 
_cell_length_a                    15.186(3)
_cell_length_b                    20.183(3)
_cell_length_c                    21.725(4)
_cell_angle_alpha                 90.00
_cell_angle_beta                  102.707(3)
_cell_angle_gamma                 90.00
_cell_volume                      6495.5(19)
_cell_formula_units_Z             4
_cell_measurement_temperature     100(2)
_cell_measurement_reflns_used     4248
_cell_measurement_theta_min       2.44
_cell_measurement_theta_max        27.67
 
_exptl_crystal_description        'block'
_exptl_crystal_colour             'dark yellow'
_exptl_crystal_size_max           0.15
_exptl_crystal_size_mid           0.13
_exptl_crystal_size_min           0.11
_exptl_crystal_density_meas       ?
_exptl_crystal_density_diffrn     1.575
_exptl_crystal_density_method     'not measured'
_exptl_crystal_F_000              3088.0
_exptl_absorpt_coefficient_mu     1.892
_exptl_absorpt_correction_type    'empirical'
_exptl_absorpt_correction_T_min   0.753
_exptl_absorpt_correction_T_max   0.812
_exptl_absorpt_process_details    'sadabs'
 
_exptl_special_details
;
 ?
;
 
_diffrn_ambient_temperature       100(2)
_diffrn_radiation_wavelength      0.71073
_diffrn_radiation_type            MoK\a
_diffrn_radiation_source          'fine-focus sealed tube'
_diffrn_radiation_monochromator   graphite
_diffrn_measurement_device_type   'CCD area detector'
_diffrn_measurement_method        'phi and omega scans'
_diffrn_detector_area_resol_mean  ?
_diffrn_standards_number          ?
_diffrn_standards_interval_count  ?
_diffrn_standards_interval_time   ?
_diffrn_standards_decay_%         ?
_diffrn_reflns_number             33248
_diffrn_reflns_av_R_equivalents   0.0763
_diffrn_reflns_av_sigmaI/netI     0.0942
_diffrn_reflns_limit_h_min        -15
_diffrn_reflns_limit_h_max        18
_diffrn_reflns_limit_k_min        -21
_diffrn_reflns_limit_k_max        24
_diffrn_reflns_limit_l_min        -25
_diffrn_reflns_limit_l_max        25
_diffrn_reflns_theta_min          4.09
_diffrn_reflns_theta_max          25.03
_reflns_number_total              11392
_reflns_number_gt                 7574
_reflns_threshold_expression      >2sigma(I)
 
_computing_data_collection      'Bruker SMART'
_computing_cell_refinement      'Bruker SMART'
_computing_data_reduction       'Bruker SAINT'
_computing_structure_solution   'Bruker SHELXTL'
_computing_structure_refinement 'Bruker SHELXTL'
_computing_molecular_graphics   'Bruker SHELXTL'
_computing_publication_material 'Bruker SHELXTL'
 
 
_refine_special_details
;
 Refinement of F^2^ against ALL reflections.  The weighted R-factor wR and
 goodness of fit S are based on F^2^, conventional R-factors R are based
 on F, with F set to zero for negative F^2^. The threshold expression of
 F^2^ > 2sigma(F^2^) is used only for calculating R-factors(gt) etc. and is
 not relevant to the choice of reflections for refinement.  R-factors based
 on F^2^ are statistically about twice as large as those based on F, and R-
 factors based on ALL data will be even larger.
;
 
_refine_ls_structure_factor_coef  Fsqd
_refine_ls_matrix_type            full
_refine_ls_weighting_scheme       calc
_refine_ls_weighting_details
 'calc w=1/[\s^2^(Fo^2^)+(0.0747P)^2^+45.9319P] where P=(Fo^2^+2Fc^2^)/3'
_atom_sites_solution_primary      direct
_atom_sites_solution_secondary    difmap
_atom_sites_solution_hydrogens    geom
_refine_ls_hydrogen_treatment     mixed
_refine_ls_extinction_method      none
_refine_ls_extinction_coef        ?
_refine_ls_number_reflns          11392
_refine_ls_number_parameters      671
_refine_ls_number_restraints      61
_refine_ls_R_factor_all           0.1191
_refine_ls_R_factor_gt            0.0778
_refine_ls_wR_factor_ref          0.1920
_refine_ls_wR_factor_gt           0.1695
_refine_ls_goodness_of_fit_ref    1.042
_refine_ls_restrained_S_all       1.044
_refine_ls_shift/su_max           0.000
_refine_ls_shift/su_mean          0.000
 
loop_
 _atom_site_label
 _atom_site_type_symbol
 _atom_site_fract_x
 _atom_site_fract_y
 _atom_site_fract_z
 _atom_site_U_iso_or_equiv
 _atom_site_adp_type
 _atom_site_occupancy
 _atom_site_symmetry_multiplicity
 _atom_site_calc_flag
 _atom_site_refinement_flags
 _atom_site_disorder_assembly
 _atom_site_disorder_group
Sn4 Sn 0.43681(5) 0.92216(3) 0.11345(3) 0.0266(2) Uani 1 1 d . . .
Sn3 Sn 0.49376(5) 0.92280(3) -0.02927(3) 0.02489(19) Uani 1 1 d . . .
Sn1 Sn 1.07714(6) 0.48712(5) 0.06586(4) 0.0445(3) Uani 1 1 d . . .
Sn2 Sn 0.87076(6) 0.50580(5) 0.09990(4) 0.0466(3) Uani 1 1 d . . .
Cr1 Cr 0.58204(13) 0.64941(8) -0.07188(7) 0.0306(4) Uani 1 1 d . . .
Cr2 Cr 0.52303(13) 1.13938(8) 0.30266(8) 0.0318(4) Uani 1 1 d . . .
O3 O 0.6830(6) 0.7177(4) 0.0455(4) 0.054(2) Uani 1 1 d . . .
O4 O 0.7150(7) 0.7099(5) -0.1394(5) 0.074(3) Uani 1 1 d . . .
O1 O 0.7668(5) 0.5242(4) 0.0155(3) 0.0376(19) Uani 1 1 d . . .
O2 O 0.6754(5) 0.5347(4) 0.0820(3) 0.041(2) Uani 1 1 d . . .
O6 O 0.9433(5) 0.5034(4) 0.0330(3) 0.0332(17) Uani 1 1 d . . .
O7 O 1.0115(6) 0.4841(5) 0.1462(4) 0.059(3) Uani 1 1 d . . .
O12 O 0.6545(6) 1.0420(5) 0.2704(4) 0.054(2) Uani 1 1 d . . .
O11 O 0.6453(10) 1.2526(6) 0.2935(6) 0.110(5) Uani 1 1 d . . .
O9 O 0.4107(5) 0.9646(3) 0.2366(3) 0.0315(17) Uani 1 1 d . . .
O8 O 0.4310(5) 1.0203(3) 0.1526(3) 0.0310(17) Uani 1 1 d . . .
O14 O 0.4523(5) 0.8551(3) 0.0367(3) 0.0298(17) Uani 1 1 d . . .
O13 O 0.4709(5) 0.9773(3) 0.0448(3) 0.0265(16) Uani 1 1 d . . .
O10 O 0.6189(6) 1.1204(4) 0.4376(4) 0.047(2) Uani 1 1 d . . .
O5 O 0.4701(7) 0.7698(4) -0.1121(5) 0.063(3) Uani 1 1 d . . .
C36 C 0.5812(8) 1.1265(6) 0.3851(5) 0.038(3) Uani 1 1 d . . .
C26 C 0.8561(12) 0.6603(10) 0.2444(8) 0.092(6) Uani 1 1 d . . .
H26A H 0.9118 0.6836 0.2440 0.111 Uiso 1 1 calc R . .
H26B H 0.8067 0.6861 0.2200 0.111 Uiso 1 1 calc R . .
C27 C 0.8450(14) 0.6554(15) 0.3109(9) 0.162(13) Uani 1 1 d . . .
H27A H 0.7841 0.6429 0.3111 0.243 Uiso 1 1 calc R . .
H27B H 0.8582 0.6975 0.3314 0.243 Uiso 1 1 calc R . .
H27C H 0.8858 0.6226 0.3331 0.243 Uiso 1 1 calc R . .
C22 C 1.186(2) 0.7023(14) 0.050(2) 0.37(3) Uani 1 1 d DU . .
H22A H 1.1453 0.7238 0.0722 0.439 Uiso 1 1 calc R . .
H22B H 1.2463 0.7044 0.0768 0.439 Uiso 1 1 calc R . .
C21 C 1.158(2) 0.6269(14) 0.0390(14) 0.214(17) Uani 1 1 d DU . .
H21A H 1.1989 0.6077 0.0155 0.257 Uiso 1 1 calc R . .
H21B H 1.0987 0.6270 0.0107 0.257 Uiso 1 1 calc R . .
C11 C 0.8192(11) 0.4101(8) 0.1219(9) 0.086(6) Uani 1 1 d DU . .
H11A H 0.7654 0.4003 0.0899 0.103 Uiso 1 1 calc R . .
H11B H 0.8638 0.3767 0.1186 0.103 Uiso 1 1 calc R . .
C13 C 0.761(3) 0.331(2) 0.192(3) 0.41(3) Uani 1 1 d DU . .
H13A H 0.7206 0.3300 0.2209 0.489 Uiso 1 1 calc R . .
H13B H 0.7272 0.3152 0.1510 0.489 Uiso 1 1 calc R . .
C35 C 0.6000(11) 1.2075(7) 0.2981(6) 0.063(4) Uani 1 1 d . . .
C37 C 0.6037(8) 1.0803(6) 0.2827(5) 0.036(3) Uani 1 1 d . . .
C28 C 0.4201(7) 1.0168(5) 0.2091(5) 0.028(2) Uani 1 1 d . . .
C30 C 0.4246(8) 1.1432(5) 0.2118(5) 0.037(3) Uani 1 1 d . . .
H30 H 0.4349 1.1431 0.1711 0.044 Uiso 1 1 calc R . .
C31 C 0.4199(10) 1.2024(6) 0.2434(5) 0.052(4) Uani 1 1 d . . .
H31 H 0.4273 1.2422 0.2237 0.063 Uiso 1 1 calc R . .
C32 C 0.4042(9) 1.2030(6) 0.3045(5) 0.046(3) Uani 1 1 d . . .
H32 H 0.4003 1.2429 0.3252 0.056 Uiso 1 1 calc R . .
C33 C 0.3944(8) 1.1428(6) 0.3341(5) 0.038(3) Uani 1 1 d . . .
H33 H 0.3853 1.1426 0.3751 0.045 Uiso 1 1 calc R . .
C34 C 0.3982(7) 1.0839(5) 0.3029(4) 0.030(2) Uani 1 1 d . . .
H34 H 0.3903 1.0443 0.3229 0.036 Uiso 1 1 calc R . .
C29 C 0.4134(8) 1.0823(5) 0.2426(5) 0.031(2) Uani 1 1 d . . .
C38 C 0.2991(9) 0.8952(6) 0.0987(5) 0.042(3) Uani 1 1 d . . .
H38A H 0.2728 0.9022 0.0543 0.051 Uiso 1 1 calc R . .
H38B H 0.2974 0.8479 0.1061 0.051 Uiso 1 1 calc R . .
C39 C 0.2366(9) 0.9269(7) 0.1351(6) 0.056(4) Uani 1 1 d . . .
H39A H 0.2384 0.9746 0.1297 0.067 Uiso 1 1 calc R . .
H39B H 0.2586 0.9175 0.1796 0.067 Uiso 1 1 calc R . .
C40 C 0.1385(9) 0.9036(8) 0.1151(7) 0.062(4) Uani 1 1 d . . .
H40A H 0.1165 0.9128 0.0706 0.074 Uiso 1 1 calc R . .
H40B H 0.1365 0.8560 0.1209 0.074 Uiso 1 1 calc R . .
C41 C 0.0793(13) 0.9346(13) 0.1499(11) 0.131(9) Uani 1 1 d . . .
H41A H 0.0214 0.9132 0.1399 0.196 Uiso 1 1 calc R . .
H41B H 0.0724 0.9806 0.1387 0.196 Uiso 1 1 calc R . .
H41C H 0.1046 0.9306 0.1943 0.196 Uiso 1 1 calc R . .
C14O C 0.4436(10) 0.7854(6) 0.0382(6) 0.057(4) Uani 1 1 d . . .
H46A H 0.4994 0.7652 0.0347 0.086 Uiso 1 1 calc R . .
H46B H 0.3963 0.7714 0.0037 0.086 Uiso 1 1 calc R . .
H46C H 0.4291 0.7725 0.0774 0.086 Uiso 1 1 calc R . .
C50 C 0.3800(8) 0.9171(5) -0.1059(5) 0.036(3) Uani 1 1 d . . .
H50A H 0.3760 0.9586 -0.1288 0.043 Uiso 1 1 calc R . .
H50B H 0.3916 0.8826 -0.1341 0.043 Uiso 1 1 calc R . .
C51 C 0.2914(10) 0.9041(9) -0.0921(6) 0.071(5) Uani 1 1 d . . .
H51A H 0.2815 0.9356 -0.0606 0.086 Uiso 1 1 calc R . .
H51B H 0.2921 0.8602 -0.0739 0.086 Uiso 1 1 calc R . .
C52 C 0.2124(10) 0.9083(9) -0.1487(7) 0.069(4) Uani 1 1 d . . .
H52A H 0.2135 0.9514 -0.1683 0.083 Uiso 1 1 calc R . .
H52B H 0.2206 0.8751 -0.1793 0.083 Uiso 1 1 calc R . .
C53 C 0.1211(12) 0.8985(15) -0.1340(10) 0.141(10) Uani 1 1 d . . .
H53A H 0.0766 0.8937 -0.1726 0.212 Uiso 1 1 calc R . .
H53B H 0.1066 0.9362 -0.1112 0.212 Uiso 1 1 calc R . .
H53C H 0.1220 0.8593 -0.1088 0.212 Uiso 1 1 calc R . .
C42 C 0.5566(9) 0.8919(6) 0.1791(5) 0.044(3) Uani 1 1 d . . .
H42A H 0.5729 0.9263 0.2107 0.053 Uiso 1 1 calc R . .
H42B H 0.5429 0.8523 0.2005 0.053 Uiso 1 1 calc R . .
C43 C 0.6364(8) 0.8779(6) 0.1520(6) 0.042(3) Uani 1 1 d . . .
H43A H 0.6448 0.9144 0.1248 0.051 Uiso 1 1 calc R . .
H43B H 0.6247 0.8383 0.1261 0.051 Uiso 1 1 calc R . .
C45 C 0.8049(11) 0.8533(9) 0.1739(8) 0.079(5) Uani 1 1 d . . .
H45A H 0.8106 0.8875 0.1443 0.119 Uiso 1 1 calc R . .
H45B H 0.7963 0.8113 0.1525 0.119 Uiso 1 1 calc R . .
H45C H 0.8587 0.8517 0.2067 0.119 Uiso 1 1 calc R . .
C24 C 0.6235(8) 0.8792(5) -0.0231(5) 0.032(3) Uani 1 1 d . . .
H24A H 0.6335 0.8473 0.0111 0.038 Uiso 1 1 calc R . .
H24B H 0.6218 0.8547 -0.0618 0.038 Uiso 1 1 calc R . .
C47 C 0.7030(9) 0.9246(7) -0.0128(7) 0.058(4) Uani 1 1 d . . .
H47A H 0.7076 0.9475 0.0270 0.070 Uiso 1 1 calc R . .
H47B H 0.6931 0.9577 -0.0460 0.070 Uiso 1 1 calc R . .
C9 C 0.6438(9) 0.6913(6) -0.0004(5) 0.041(3) Uani 1 1 d . . .
C10 C 0.6646(10) 0.6854(6) -0.1125(6) 0.052(4) Uani 1 1 d . . .
C8 C 0.5148(8) 0.7229(6) -0.0965(5) 0.036(3) Uani 1 1 d . . .
C1 C 0.6895(8) 0.5357(5) 0.0291(5) 0.032(3) Uani 1 1 d . . .
C2 C 0.6142(7) 0.5523(5) -0.0258(5) 0.029(2) Uani 1 1 d . . .
C3 C 0.6250(8) 0.5479(5) -0.0884(5) 0.033(3) Uani 1 1 d . . .
H3 H 0.6795 0.5338 -0.0967 0.039 Uiso 1 1 calc R . .
C4 C 0.5522(8) 0.5649(5) -0.1385(5) 0.037(3) Uani 1 1 d . . .
H4 H 0.5587 0.5604 -0.1799 0.045 Uiso 1 1 calc R . .
C5 C 0.4721(8) 0.5879(5) -0.1274(5) 0.033(3) Uani 1 1 d . . .
H5 H 0.4260 0.6009 -0.1608 0.040 Uiso 1 1 calc R . .
C6 C 0.4603(8) 0.5918(5) -0.0648(5) 0.037(3) Uani 1 1 d . . .
H6 H 0.4060 0.6068 -0.0567 0.045 Uiso 1 1 calc R . .
C7 C 0.5308(7) 0.5728(5) -0.0153(5) 0.028(2) Uani 1 1 d . . .
H7 H 0.5221 0.5739 0.0257 0.033 Uiso 1 1 calc R . .
C12 C 0.8673(10) 0.5972(7) 0.1450(6) 0.061(4) Uani 1 1 d . . .
H12A H 0.9222 0.6212 0.1437 0.073 Uiso 1 1 calc R . .
H12B H 0.8170 0.6227 0.1212 0.073 Uiso 1 1 calc R . .
C25 C 0.8581(11) 0.5935(9) 0.2132(7) 0.075(5) Uani 1 1 d . . .
H25A H 0.8031 0.5698 0.2147 0.090 Uiso 1 1 calc R . .
H25B H 0.9083 0.5681 0.2372 0.090 Uiso 1 1 calc R . .
C20 C 1.1520(10) 0.5748(9) 0.0946(8) 0.076(5) Uani 1 1 d U . .
H20A H 1.1253 0.5972 0.1256 0.091 Uiso 1 1 calc R . .
H20B H 1.2129 0.5623 0.1155 0.091 Uiso 1 1 calc R . .
C16 C 1.1065(17) 0.3841(9) 0.0740(9) 0.117(9) Uani 1 1 d . . .
H16A H 1.1701 0.3789 0.0932 0.140 Uiso 1 1 calc R . .
H16B H 1.0726 0.3649 0.1025 0.140 Uiso 1 1 calc R . .
C17 C 1.086(2) 0.3443(12) 0.0122(15) 0.179(13) Uani 1 1 d U . .
H17A H 1.0305 0.3622 -0.0137 0.215 Uiso 1 1 calc R . .
H17B H 1.1336 0.3535 -0.0097 0.215 Uiso 1 1 calc R . .
C18 C 1.0748(14) 0.2692(9) 0.0138(12) 0.116(8) Uani 1 1 d . . .
H18A H 1.0252 0.2583 0.0335 0.140 Uiso 1 1 calc R . .
H18B H 1.1293 0.2496 0.0388 0.140 Uiso 1 1 calc R . .
C19 C 1.055(3) 0.2392(16) -0.0558(19) 0.32(3) Uani 1 1 d . . .
H19A H 1.0655 0.2728 -0.0849 0.478 Uiso 1 1 calc R . .
H19B H 0.9939 0.2244 -0.0675 0.478 Uiso 1 1 calc R . .
H19C H 1.0952 0.2025 -0.0571 0.478 Uiso 1 1 calc R . .
C7O C 1.0544(18) 0.476(2) 0.2089(9) 0.26(2) Uani 1 1 d . . .
H60A H 1.1169 0.4653 0.2117 0.393 Uiso 1 1 calc R . .
H60B H 1.0263 0.4401 0.2267 0.393 Uiso 1 1 calc R . .
H60C H 1.0499 0.5158 0.2318 0.393 Uiso 1 1 calc R . .
C14 C 0.796(3) 0.4030(19) 0.1857(16) 0.41(3) Uani 1 1 d DU . .
H14A H 0.7500 0.4349 0.1899 0.489 Uiso 1 1 calc R . .
H14B H 0.8491 0.4112 0.2189 0.489 Uiso 1 1 calc R . .
C23 C 1.186(5) 0.742(3) -0.012(3) 0.46(5) Uani 1 1 d DU . .
H23A H 1.1944 0.7120 -0.0447 0.696 Uiso 1 1 calc R . .
H23B H 1.2342 0.7738 -0.0045 0.696 Uiso 1 1 calc R . .
H23C H 1.1294 0.7646 -0.0255 0.696 Uiso 1 1 calc R . .
C15 C 0.843(3) 0.2851(19) 0.216(3) 0.37(3) Uani 1 1 d DU . .
H15A H 0.8469 0.2523 0.1849 0.550 Uiso 1 1 calc R . .
H15B H 0.8366 0.2636 0.2543 0.550 Uiso 1 1 calc R . .
H15C H 0.8974 0.3112 0.2246 0.550 Uiso 1 1 calc R . .
C1A C 0.7915(10) 0.8895(8) -0.0121(8) 0.074(5) Uani 1 1 d . . .
H1AA H 0.8009 0.8557 0.0205 0.088 Uiso 1 1 calc R . .
H1AB H 0.7875 0.8676 -0.0523 0.088 Uiso 1 1 calc R . .
C1B C 0.8699(13) 0.9347(12) -0.0004(14) 0.157(12) Uani 1 1 d . . .
H1BA H 0.8595 0.9699 -0.0308 0.235 Uiso 1 1 calc R . .
H1BB H 0.9230 0.9106 -0.0040 0.235 Uiso 1 1 calc R . .
H1BC H 0.8783 0.9530 0.0413 0.235 Uiso 1 1 calc R . .
C1C C 0.7240(9) 0.8679(7) 0.2025(6) 0.052(3) Uani 1 1 d . . .
H1CA H 0.7361 0.9076 0.2282 0.063 Uiso 1 1 calc R . .
H1CB H 0.7157 0.8315 0.2298 0.063 Uiso 1 1 calc R . .
 
loop_
 _atom_site_aniso_label
 _atom_site_aniso_U_11
 _atom_site_aniso_U_22
 _atom_site_aniso_U_33
 _atom_site_aniso_U_23
 _atom_site_aniso_U_13
 _atom_site_aniso_U_12
Sn4 0.0419(5) 0.0187(4) 0.0199(4) 0.0010(3) 0.0080(3) -0.0002(3)
Sn3 0.0414(5) 0.0157(4) 0.0176(3) -0.0011(3) 0.0063(3) 0.0013(3)
Sn1 0.0390(5) 0.0624(6) 0.0322(4) 0.0011(4) 0.0083(4) 0.0180(4)
Sn2 0.0457(6) 0.0616(6) 0.0350(5) 0.0066(4) 0.0141(4) 0.0137(4)
Cr1 0.0468(12) 0.0219(9) 0.0223(9) 0.0000(7) 0.0059(8) 0.0000(8)
Cr2 0.0524(12) 0.0221(9) 0.0227(9) -0.0021(7) 0.0118(8) -0.0033(8)
O3 0.078(7) 0.039(5) 0.038(5) 0.004(4) -0.007(5) -0.011(5)
O4 0.059(7) 0.082(8) 0.082(7) 0.041(6) 0.021(6) -0.002(6)
O1 0.043(5) 0.042(5) 0.028(4) 0.003(3) 0.010(4) 0.012(4)
O2 0.038(5) 0.058(5) 0.030(4) 0.013(4) 0.013(4) 0.014(4)
O6 0.025(4) 0.042(5) 0.033(4) -0.005(3) 0.007(3) 0.004(3)
O7 0.061(6) 0.082(7) 0.033(5) 0.011(4) 0.010(4) 0.030(5)
O12 0.046(6) 0.067(6) 0.050(5) -0.017(5) 0.015(4) 0.005(5)
O11 0.151(13) 0.075(8) 0.105(10) 0.015(7) 0.029(9) -0.063(8)
O9 0.046(5) 0.026(4) 0.021(4) 0.000(3) 0.005(3) -0.002(3)
O8 0.054(5) 0.025(4) 0.016(4) -0.004(3) 0.010(3) -0.003(3)
O14 0.045(5) 0.022(4) 0.025(4) -0.003(3) 0.014(3) -0.003(3)
O13 0.044(5) 0.010(3) 0.028(4) 0.000(3) 0.013(3) 0.001(3)
O10 0.044(5) 0.063(6) 0.032(5) -0.001(4) 0.002(4) -0.005(4)
O5 0.072(7) 0.031(5) 0.080(7) 0.011(5) 0.006(5) 0.008(5)
C36 0.042(7) 0.042(7) 0.034(7) -0.004(5) 0.015(6) -0.001(5)
C26 0.077(13) 0.129(17) 0.062(11) -0.029(11) -0.004(9) 0.016(11)
C27 0.091(16) 0.31(4) 0.070(13) -0.105(18) -0.005(11) 0.044(19)
C22 0.16(3) 0.18(3) 0.68(8) -0.27(5) -0.08(4) 0.00(2)
C21 0.24(4) 0.24(4) 0.13(2) -0.04(2) -0.02(2) -0.12(3)
C11 0.050(10) 0.079(12) 0.130(15) 0.080(11) 0.025(9) 0.011(8)
C13 0.33(4) 0.32(4) 0.56(5) 0.32(4) 0.09(4) 0.03(3)
C35 0.090(12) 0.042(8) 0.053(8) 0.002(7) 0.009(8) -0.029(8)
C37 0.035(7) 0.044(7) 0.030(6) -0.008(5) 0.008(5) -0.010(6)
C28 0.037(7) 0.021(6) 0.023(5) 0.005(4) 0.001(5) 0.011(5)
C30 0.052(8) 0.036(7) 0.020(5) 0.008(5) 0.004(5) 0.006(5)
C31 0.094(11) 0.021(6) 0.033(7) -0.001(5) -0.002(7) 0.011(6)
C32 0.076(10) 0.029(7) 0.031(6) -0.008(5) 0.004(6) 0.013(6)
C33 0.047(8) 0.039(7) 0.027(6) -0.002(5) 0.008(5) 0.006(6)
C34 0.041(7) 0.031(6) 0.015(5) -0.001(4) 0.002(4) 0.003(5)
C29 0.045(7) 0.021(6) 0.026(5) 0.000(4) 0.004(5) 0.000(5)
C38 0.064(9) 0.028(6) 0.031(6) 0.003(5) 0.001(6) 0.008(6)
C39 0.054(9) 0.070(10) 0.044(8) -0.008(7) 0.011(6) -0.005(7)
C40 0.047(9) 0.087(11) 0.056(9) -0.005(8) 0.021(7) -0.013(8)
C41 0.068(14) 0.20(2) 0.14(2) -0.074(18) 0.056(13) -0.027(14)
C14O 0.091(12) 0.028(7) 0.054(8) -0.007(6) 0.016(8) 0.002(7)
C50 0.047(7) 0.029(6) 0.027(6) 0.001(5) -0.003(5) 0.000(5)
C51 0.070(11) 0.111(14) 0.034(7) -0.002(8) 0.012(7) 0.006(9)
C52 0.050(10) 0.099(13) 0.055(9) -0.001(8) 0.005(7) -0.011(8)
C53 0.043(12) 0.29(3) 0.085(14) -0.037(17) -0.001(10) -0.010(15)
C42 0.058(9) 0.045(7) 0.030(6) 0.010(5) 0.010(6) 0.005(6)
C43 0.049(8) 0.024(6) 0.051(7) 0.006(5) 0.005(6) -0.002(5)
C45 0.063(11) 0.096(13) 0.079(11) -0.008(10) 0.016(9) -0.001(9)
C24 0.048(7) 0.030(6) 0.022(5) 0.005(4) 0.018(5) 0.011(5)
C47 0.058(9) 0.046(8) 0.072(10) 0.022(7) 0.017(7) -0.002(7)
C9 0.061(9) 0.029(6) 0.031(6) 0.008(5) 0.007(6) 0.000(6)
C10 0.072(10) 0.037(7) 0.049(8) 0.021(6) 0.021(7) 0.002(7)
C8 0.051(8) 0.026(6) 0.032(6) 0.003(5) 0.011(5) 0.000(5)
C1 0.048(8) 0.021(6) 0.027(6) -0.002(4) 0.009(5) -0.004(5)
C2 0.041(7) 0.014(5) 0.032(6) -0.004(4) 0.010(5) 0.002(4)
C3 0.047(7) 0.024(6) 0.027(6) 0.001(4) 0.007(5) 0.009(5)
C4 0.060(8) 0.024(6) 0.028(6) -0.006(5) 0.008(5) -0.003(5)
C5 0.041(7) 0.025(6) 0.032(6) -0.004(5) 0.002(5) -0.003(5)
C6 0.032(7) 0.034(7) 0.046(7) -0.004(5) 0.010(5) -0.001(5)
C7 0.043(7) 0.013(5) 0.029(5) 0.000(4) 0.012(5) 0.003(5)
C12 0.060(10) 0.071(10) 0.053(8) -0.015(7) 0.016(7) -0.001(7)
C25 0.054(10) 0.124(15) 0.047(9) -0.008(9) 0.011(7) 0.018(9)
C20 0.039(9) 0.110(14) 0.078(11) -0.039(10) 0.010(8) -0.019(8)
C16 0.19(2) 0.088(14) 0.079(13) 0.033(11) 0.055(14) 0.093(15)
C17 0.22(3) 0.098(19) 0.20(3) -0.010(19) 0.00(2) 0.08(2)
C18 0.091(16) 0.063(13) 0.18(2) 0.013(14) -0.008(15) -0.004(11)
C19 0.40(6) 0.13(3) 0.28(4) -0.10(3) -0.22(4) 0.06(3)
C7O 0.12(2) 0.63(8) 0.043(12) 0.03(2) 0.027(13) 0.11(3)
C14 0.33(4) 0.32(4) 0.56(5) 0.32(4) 0.09(4) 0.03(3)
C23 0.65(9) 0.26(5) 0.44(7) 0.21(5) 0.03(6) -0.07(5)
C15 0.36(6) 0.32(5) 0.51(7) -0.19(5) 0.28(6) -0.11(5)
C1A 0.053(10) 0.083(12) 0.090(12) 0.019(9) 0.024(9) 0.015(9)
C1B 0.052(13) 0.14(2) 0.27(3) 0.11(2) 0.019(16) 0.020(13)
C1C 0.058(9) 0.046(8) 0.051(8) 0.013(6) 0.007(7) -0.006(6)
 
_geom_special_details
;
 All esds (except the esd in the dihedral angle between two l.s. planes)
 are estimated using the full covariance matrix.  The cell esds are taken
 into account individually in the estimation of esds in distances, angles
 and torsion angles; correlations between esds in cell parameters are only
 used when they are defined by crystal symmetry.  An approximate (isotropic)
 treatment of cell esds is used for estimating esds involving l.s. planes.
;
 
loop_
 _geom_bond_atom_site_label_1
 _geom_bond_atom_site_label_2
 _geom_bond_distance
 _geom_bond_site_symmetry_2
 _geom_bond_publ_flag
Sn4 O13 2.019(7) . ?
Sn4 C38 2.115(13) . ?
Sn4 C42 2.139(12) . ?
Sn4 O8 2.166(7) . ?
Sn4 O14 2.200(7) . ?
Sn3 O13 2.041(6) . ?
Sn3 C50 2.122(10) . ?
Sn3 O13 2.131(6) 3_675 ?
Sn3 C24 2.135(11) . ?
Sn3 O14 2.172(7) . ?
Sn1 O6 2.027(7) . ?
Sn1 O6 2.109(7) 3_765 ?
Sn1 C20 2.122(15) . ?
Sn1 C16 2.125(17) . ?
Sn1 O7 2.193(9) . ?
Sn2 O6 2.009(7) . ?
Sn2 C12 2.095(14) . ?
Sn2 O1 2.172(7) . ?
Sn2 C11 2.177(14) . ?
Sn2 O7 2.197(9) . ?
Cr1 C8 1.813(12) . ?
Cr1 C10 1.834(14) . ?
Cr1 C9 1.835(12) . ?
Cr1 C3 2.204(10) . ?
Cr1 C2 2.205(10) . ?
Cr1 C5 2.212(11) . ?
Cr1 C6 2.218(12) . ?
Cr1 C4 2.219(10) . ?
Cr1 C7 2.219(10) . ?
Cr2 C35 1.822(14) . ?
Cr2 C37 1.829(13) . ?
Cr2 C36 1.833(12) . ?
Cr2 C31 2.199(12) . ?
Cr2 C30 2.200(11) . ?
Cr2 C29 2.202(11) . ?
Cr2 C34 2.202(11) . ?
Cr2 C33 2.208(12) . ?
Cr2 C32 2.223(13) . ?
O3 C9 1.171(13) . ?
O4 C10 1.169(15) . ?
O1 C1 1.293(13) . ?
O2 C1 1.216(12) . ?
O6 Sn1 2.109(7) 3_765 ?
O7 C7O 1.39(2) . ?
O12 C37 1.165(13) . ?
O11 C35 1.157(15) . ?
O9 C28 1.235(11) . ?
O8 C28 1.276(12) . ?
O14 C14O 1.413(13) . ?
O13 Sn3 2.131(6) 3_675 ?
O10 C36 1.164(13) . ?
O5 C8 1.171(13) . ?
C26 C27 1.49(2) . ?
C26 C25 1.51(2) . ?
C22 C23 1.57(2) . ?
C22 C21 1.585(18) . ?
C21 C20 1.62(3) . ?
C11 C14 1.51(2) . ?
C13 C15 1.553(19) . ?
C13 C14 1.571(19) . ?
C28 C29 1.524(14) . ?
C30 C31 1.388(15) . ?
C30 C29 1.428(14) . ?
C31 C32 1.400(17) . ?
C32 C33 1.397(16) . ?
C33 C34 1.376(14) . ?
C34 C29 1.378(14) . ?
C38 C39 1.505(17) . ?
C39 C40 1.533(18) . ?
C40 C41 1.44(2) . ?
C50 C51 1.465(18) . ?
C51 C52 1.519(19) . ?
C52 C53 1.50(2) . ?
C42 C43 1.486(17) . ?
C43 C1C 1.540(16) . ?
C45 C1C 1.52(2) . ?
C24 C47 1.493(17) . ?
C47 C1A 1.515(19) . ?
C1 C2 1.499(15) . ?
C2 C7 1.398(15) . ?
C2 C3 1.407(14) . ?
C3 C4 1.412(15) . ?
C4 C5 1.372(16) . ?
C5 C6 1.412(15) . ?
C6 C7 1.394(15) . ?
C12 C25 1.519(19) . ?
C16 C17 1.54(3) . ?
C17 C18 1.53(3) . ?
C18 C19 1.60(4) . ?
C1A C1B 1.48(2) . ?
 
loop_
 _geom_angle_atom_site_label_1
 _geom_angle_atom_site_label_2
 _geom_angle_atom_site_label_3
 _geom_angle
 _geom_angle_site_symmetry_1
 _geom_angle_site_symmetry_3
 _geom_angle_publ_flag
O13 Sn4 C38 115.8(4) . . ?
O13 Sn4 C42 109.3(4) . . ?
C38 Sn4 C42 134.0(5) . . ?
O13 Sn4 O8 79.9(2) . . ?
C38 Sn4 O8 99.8(4) . . ?
C42 Sn4 O8 95.8(4) . . ?
O13 Sn4 O14 72.0(2) . . ?
C38 Sn4 O14 89.7(4) . . ?
C42 Sn4 O14 96.5(4) . . ?
O8 Sn4 O14 151.7(2) . . ?
O13 Sn3 C50 113.4(4) . . ?
O13 Sn3 O13 72.9(3) . 3_675 ?
C50 Sn3 O13 96.7(4) . 3_675 ?
O13 Sn3 C24 119.2(3) . . ?
C50 Sn3 C24 127.4(4) . . ?
O13 Sn3 C24 98.0(3) 3_675 . ?
O13 Sn3 O14 72.3(2) . . ?
C50 Sn3 O14 100.3(4) . . ?
O13 Sn3 O14 145.0(2) 3_675 . ?
C24 Sn3 O14 95.6(3) . . ?
O6 Sn1 O6 73.4(3) . 3_765 ?
O6 Sn1 C20 113.5(5) . . ?
O6 Sn1 C20 100.0(5) 3_765 . ?
O6 Sn1 C16 111.3(8) . . ?
O6 Sn1 C16 98.9(5) 3_765 . ?
C20 Sn1 C16 134.6(9) . . ?
O6 Sn1 O7 71.9(3) . . ?
O6 Sn1 O7 145.3(3) 3_765 . ?
C20 Sn1 O7 95.5(5) . . ?
C16 Sn1 O7 91.8(6) . . ?
O6 Sn2 C12 115.7(5) . . ?
O6 Sn2 O1 78.8(3) . . ?
C12 Sn2 O1 99.0(5) . . ?
O6 Sn2 C11 114.8(6) . . ?
C12 Sn2 C11 129.1(7) . . ?
O1 Sn2 C11 96.2(5) . . ?
O6 Sn2 O7 72.1(3) . . ?
C12 Sn2 O7 94.8(5) . . ?
O1 Sn2 O7 150.9(3) . . ?
C11 Sn2 O7 94.8(5) . . ?
C8 Cr1 C10 86.2(6) . . ?
C8 Cr1 C9 91.3(5) . . ?
C10 Cr1 C9 87.0(6) . . ?
C8 Cr1 C3 151.7(4) . . ?
C10 Cr1 C3 91.8(5) . . ?
C9 Cr1 C3 116.9(5) . . ?
C8 Cr1 C2 156.1(5) . . ?
C10 Cr1 C2 117.6(5) . . ?
C9 Cr1 C2 90.3(4) . . ?
C3 Cr1 C2 37.2(4) . . ?
C8 Cr1 C5 89.4(5) . . ?
C10 Cr1 C5 118.3(5) . . ?
C9 Cr1 C5 154.7(5) . . ?
C3 Cr1 C5 66.7(4) . . ?
C2 Cr1 C5 79.3(4) . . ?
C8 Cr1 C6 91.5(5) . . ?
C10 Cr1 C6 155.4(5) . . ?
C9 Cr1 C6 117.5(5) . . ?
C3 Cr1 C6 78.7(4) . . ?
C2 Cr1 C6 66.9(4) . . ?
C5 Cr1 C6 37.2(4) . . ?
C8 Cr1 C4 114.6(5) . . ?
C10 Cr1 C4 93.1(5) . . ?
C9 Cr1 C4 154.1(5) . . ?
C3 Cr1 C4 37.2(4) . . ?
C2 Cr1 C4 66.8(4) . . ?
C5 Cr1 C4 36.1(4) . . ?
C6 Cr1 C4 65.7(4) . . ?
C8 Cr1 C7 119.3(5) . . ?
C10 Cr1 C7 154.5(5) . . ?
C9 Cr1 C7 91.6(4) . . ?
C3 Cr1 C7 66.1(4) . . ?
C2 Cr1 C7 36.8(4) . . ?
C5 Cr1 C7 66.2(4) . . ?
C6 Cr1 C7 36.6(4) . . ?
C4 Cr1 C7 77.3(4) . . ?
C35 Cr2 C37 90.5(6) . . ?
C35 Cr2 C36 89.1(6) . . ?
C37 Cr2 C36 86.3(5) . . ?
C35 Cr2 C31 85.1(6) . . ?
C37 Cr2 C31 131.7(5) . . ?
C36 Cr2 C31 141.5(5) . . ?
C35 Cr2 C30 104.0(5) . . ?
C37 Cr2 C30 99.6(5) . . ?
C36 Cr2 C30 165.5(5) . . ?
C31 Cr2 C30 36.8(4) . . ?
C35 Cr2 C29 140.7(5) . . ?
C37 Cr2 C29 88.7(5) . . ?
C36 Cr2 C29 130.1(5) . . ?
C31 Cr2 C29 66.9(4) . . ?
C30 Cr2 C29 37.9(4) . . ?
C35 Cr2 C34 161.2(6) . . ?
C37 Cr2 C34 106.9(4) . . ?
C36 Cr2 C34 99.0(5) . . ?
C31 Cr2 C34 78.0(5) . . ?
C30 Cr2 C34 66.7(4) . . ?
C29 Cr2 C34 36.5(4) . . ?
C35 Cr2 C33 128.0(6) . . ?
C37 Cr2 C33 141.1(5) . . ?
C36 Cr2 C33 88.4(5) . . ?
C31 Cr2 C33 66.3(5) . . ?
C30 Cr2 C33 78.7(4) . . ?
C29 Cr2 C33 66.1(4) . . ?
C34 Cr2 C33 36.4(4) . . ?
C35 Cr2 C32 95.7(6) . . ?
C37 Cr2 C32 165.9(5) . . ?
C36 Cr2 C32 106.4(5) . . ?
C31 Cr2 C32 36.9(4) . . ?
C30 Cr2 C32 66.6(4) . . ?
C29 Cr2 C32 78.6(4) . . ?
C34 Cr2 C32 65.8(4) . . ?
C33 Cr2 C32 36.7(4) . . ?
C1 O1 Sn2 111.4(6) . . ?
Sn2 O6 Sn1 114.6(3) . . ?
Sn2 O6 Sn1 138.9(4) . 3_765 ?
Sn1 O6 Sn1 106.6(3) . 3_765 ?
C7O O7 Sn1 126.0(12) . . ?
C7O O7 Sn2 132.4(12) . . ?
Sn1 O7 Sn2 101.3(3) . . ?
C28 O8 Sn4 110.6(6) . . ?
C14O O14 Sn3 133.2(7) . . ?
C14O O14 Sn4 124.6(7) . . ?
Sn3 O14 Sn4 102.0(3) . . ?
Sn4 O13 Sn3 113.6(3) . . ?
Sn4 O13 Sn3 138.8(3) . 3_675 ?
Sn3 O13 Sn3 107.1(3) . 3_675 ?
O10 C36 Cr2 177.9(11) . . ?
C27 C26 C25 113.1(18) . . ?
C23 C22 C21 114(3) . . ?
C22 C21 C20 125(3) . . ?
C14 C11 Sn2 117.0(19) . . ?
C15 C13 C14 108(2) . . ?
O11 C35 Cr2 176.6(16) . . ?
O12 C37 Cr2 179.0(11) . . ?
O9 C28 O8 124.6(9) . . ?
O9 C28 C29 118.7(9) . . ?
O8 C28 C29 116.6(9) . . ?
C31 C30 C29 118.9(10) . . ?
C31 C30 Cr2 71.6(7) . . ?
C29 C30 Cr2 71.1(6) . . ?
C30 C31 C32 121.1(11) . . ?
C30 C31 Cr2 71.6(6) . . ?
C32 C31 Cr2 72.4(7) . . ?
C33 C32 C31 119.1(10) . . ?
C33 C32 Cr2 71.1(7) . . ?
C31 C32 Cr2 70.6(7) . . ?
C34 C33 C32 120.2(10) . . ?
C34 C33 Cr2 71.6(7) . . ?
C32 C33 Cr2 72.2(7) . . ?
C33 C34 C29 121.6(10) . . ?
C33 C34 Cr2 72.0(7) . . ?
C29 C34 Cr2 71.7(7) . . ?
C34 C29 C30 119.2(10) . . ?
C34 C29 C28 121.2(9) . . ?
C30 C29 C28 119.6(9) . . ?
C34 C29 Cr2 71.8(6) . . ?
C30 C29 Cr2 71.0(6) . . ?
C28 C29 Cr2 128.0(8) . . ?
C39 C38 Sn4 121.9(8) . . ?
C38 C39 C40 114.0(11) . . ?
C41 C40 C39 113.5(14) . . ?
C51 C50 Sn3 118.4(8) . . ?
C50 C51 C52 114.9(12) . . ?
C53 C52 C51 114.9(14) . . ?
C43 C42 Sn4 116.0(8) . . ?
C42 C43 C1C 113.2(11) . . ?
C47 C24 Sn3 117.5(8) . . ?
C24 C47 C1A 113.6(12) . . ?
O3 C9 Cr1 179.4(11) . . ?
O4 C10 Cr1 177.7(12) . . ?
O5 C8 Cr1 178.8(11) . . ?
O2 C1 O1 124.9(10) . . ?
O2 C1 C2 119.6(11) . . ?
O1 C1 C2 115.5(9) . . ?
C7 C2 C3 118.6(10) . . ?
C7 C2 C1 119.8(9) . . ?
C3 C2 C1 121.6(10) . . ?
C7 C2 Cr1 72.1(6) . . ?
C3 C2 Cr1 71.3(6) . . ?
C1 C2 Cr1 127.9(7) . . ?
C2 C3 C4 119.4(11) . . ?
C2 C3 Cr1 71.4(6) . . ?
C4 C3 Cr1 71.9(6) . . ?
C5 C4 C3 121.3(10) . . ?
C5 C4 Cr1 71.7(6) . . ?
C3 C4 Cr1 70.8(6) . . ?
C4 C5 C6 119.6(10) . . ?
C4 C5 Cr1 72.2(6) . . ?
C6 C5 Cr1 71.7(6) . . ?
C7 C6 C5 119.2(11) . . ?
C7 C6 Cr1 71.7(6) . . ?
C5 C6 Cr1 71.2(7) . . ?
C6 C7 C2 121.7(10) . . ?
C6 C7 Cr1 71.6(6) . . ?
C2 C7 Cr1 71.0(6) . . ?
C25 C12 Sn2 115.5(11) . . ?
C26 C25 C12 114.1(15) . . ?
C21 C20 Sn1 115.8(11) . . ?
C17 C16 Sn1 116.1(13) . . ?
C18 C17 C16 120(2) . . ?
C17 C18 C19 111(2) . . ?
C11 C14 C13 109(2) . . ?
C1B C1A C47 113.1(15) . . ?
C45 C1C C43 112.5(12) . . ?
 
_diffrn_measured_fraction_theta_max    0.994
_diffrn_reflns_theta_full              25.03
_diffrn_measured_fraction_theta_full   0.994
_refine_diff_density_max     3.750
_refine_diff_density_min   -1.524
_refine_diff_density_rms    0.181
#===============end
data_complex2
 
_audit_creation_method            SHELXL-97
_chemical_name_systematic
;
 ?
;
_chemical_name_common             ?
_chemical_melting_point           ?
_chemical_formula_moiety          'C28 H28 Cr2 O10 Sn '
_chemical_formula_sum
 'C28 H28 Cr2 O10 Sn '
_chemical_formula_weight         747.21
 
loop_
 _atom_type_symbol
 _atom_type_description
 _atom_type_scat_dispersion_real
 _atom_type_scat_dispersion_imag
 _atom_type_scat_source
 'C'  'C'   0.0033   0.0016
 'International Tables Vol C Tables 4.2.6.8 and 6.1.1.4'
 'H'  'H'   0.0000   0.0000
 'International Tables Vol C Tables 4.2.6.8 and 6.1.1.4'
 'O'  'O'   0.0106   0.0060
 'International Tables Vol C Tables 4.2.6.8 and 6.1.1.4'
 'Cr'  'Cr'   0.3209   0.6236
 'International Tables Vol C Tables 4.2.6.8 and 6.1.1.4'
 'Sn'  'Sn'  -0.6537   1.4246
 'International Tables Vol C Tables 4.2.6.8 and 6.1.1.4'
 
_symmetry_cell_setting            Triclinic
_symmetry_space_group_name_H-M    P-1
 
loop_
 _symmetry_equiv_pos_as_xyz
 'x, y, z'
 '-x, -y, -z'
 
_cell_length_a                    11.267(5)
_cell_length_b                    11.793(5)
_cell_length_c                    11.808(5)
_cell_angle_alpha                 98.599(5)
_cell_angle_beta                  108.484(5)
_cell_angle_gamma                 93.685(5)
_cell_volume                      1460.8(11)
_cell_formula_units_Z             2
_cell_measurement_temperature     100(2)
_cell_measurement_reflns_used     1545
_cell_measurement_theta_min       2.18
_cell_measurement_theta_max       22.98
 
_exptl_crystal_description        blocl
_exptl_crystal_colour             yellow
_exptl_crystal_size_max           0.16
_exptl_crystal_size_mid           0.14
_exptl_crystal_size_min           0.12
_exptl_crystal_density_meas       ?
_exptl_crystal_density_diffrn     1.699
_exptl_crystal_density_method     'not measured'
_exptl_crystal_F_000              748
_exptl_absorpt_coefficient_mu     1.634
_exptl_absorpt_correction_type    empirical
_exptl_absorpt_correction_T_min   0.538924
_exptl_absorpt_correction_T_max   1.00
_exptl_absorpt_process_details    sadabs
 
_exptl_special_details
;
 ?
;
 
_diffrn_ambient_temperature       100(2)
_diffrn_radiation_wavelength      0.71069
_diffrn_radiation_type            MoK\a
_diffrn_radiation_source          'fine-focus sealed tube'
_diffrn_radiation_monochromator   graphite
_diffrn_measurement_device_type   'CCD area detector'
_diffrn_measurement_method        'phi and omega scans'
_diffrn_detector_area_resol_mean  ?
_diffrn_standards_number          ?
_diffrn_standards_interval_count  ?
_diffrn_standards_interval_time   ?
_diffrn_standards_decay_%         ?
_diffrn_reflns_number             7788
_diffrn_reflns_av_R_equivalents   0.0421
_diffrn_reflns_av_sigmaI/netI     0.0943
_diffrn_reflns_limit_h_min        -12
_diffrn_reflns_limit_h_max        13
_diffrn_reflns_limit_k_min        -13
_diffrn_reflns_limit_k_max        14
_diffrn_reflns_limit_l_min        -14
_diffrn_reflns_limit_l_max        14
_diffrn_reflns_theta_min          1.92
_diffrn_reflns_theta_max          25.50
_reflns_number_total              5286
_reflns_number_gt                 3716
_reflns_threshold_expression      >2sigma(I)
 
_computing_data_collection        'Bruker SMART'
_computing_cell_refinement        'Bruker SMART'
_computing_data_reduction         'Bruker SAINT'
_computing_structure_solution     'SHELXS-97 (Sheldrick, 1990)'
_computing_structure_refinement   'SHELXL-97 (Sheldrick, 1997)'
_computing_molecular_graphics     'Bruker SHELXTL'
_computing_publication_material   'Bruker SHELXTL'
 
_refine_special_details
;
 Refinement of F^2^ against ALL reflections.  The weighted R-factor wR and
 goodness of fit S are based on F^2^, conventional R-factors R are based
 on F, with F set to zero for negative F^2^. The threshold expression of
 F^2^ > 2sigma(F^2^) is used only for calculating R-factors(gt) etc. and is
 not relevant to the choice of reflections for refinement.  R-factors based
 on F^2^ are statistically about twice as large as those based on F, and R-
 factors based on ALL data will be even larger.
;
 
_refine_ls_structure_factor_coef  Fsqd
_refine_ls_matrix_type            full
_refine_ls_weighting_scheme       calc
_refine_ls_weighting_details
 'calc w=1/[\s^2^(Fo^2^)+(0.0915P)^2^+0.0000P] where P=(Fo^2^+2Fc^2^)/3'
_atom_sites_solution_primary      direct
_atom_sites_solution_secondary    difmap
_atom_sites_solution_hydrogens    geom
_refine_ls_hydrogen_treatment     constr
_refine_ls_extinction_method      none
_refine_ls_extinction_coef        ?
_refine_ls_number_reflns          5286
_refine_ls_number_parameters      372
_refine_ls_number_restraints      0
_refine_ls_R_factor_all           0.0956
_refine_ls_R_factor_gt            0.0644
_refine_ls_wR_factor_ref          0.1663
_refine_ls_wR_factor_gt           0.1476
_refine_ls_goodness_of_fit_ref    0.981
_refine_ls_restrained_S_all       0.981
_refine_ls_shift/su_max           0.001
_refine_ls_shift/su_mean          0.000
 
loop_
 _atom_site_label
 _atom_site_type_symbol
 _atom_site_fract_x
 _atom_site_fract_y
 _atom_site_fract_z
 _atom_site_U_iso_or_equiv
 _atom_site_adp_type
 _atom_site_occupancy
 _atom_site_symmetry_multiplicity
 _atom_site_calc_flag
 _atom_site_refinement_flags
 _atom_site_disorder_assembly
 _atom_site_disorder_group
O7 O 0.0728(6) 0.4452(6) -0.2457(6) 0.0525(17) Uani 1 1 d . . .
Sn1 Sn 0.11650(5) 0.92356(4) 0.37150(5) 0.02511(19) Uani 1 1 d . . .
Cr1 Cr 0.32670(11) 1.40262(10) 0.57426(11) 0.0243(3) Uani 1 1 d . . .
Cr2 Cr 0.18703(12) 0.64919(11) -0.04451(11) 0.0297(3) Uani 1 1 d . . .
O1 O 0.2271(5) 0.8860(4) 0.2566(5) 0.0276(12) Uani 1 1 d . . .
O2 O 0.1509(5) 0.7184(5) 0.2826(5) 0.0316(12) Uani 1 1 d . . .
O3 O 0.1772(5) 1.0942(4) 0.3620(5) 0.0287(12) Uani 1 1 d . . .
O4 O 0.0660(4) 1.1205(4) 0.4870(4) 0.0258(11) Uani 1 1 d . . .
O5 O 0.1092(6) 0.8038(6) -0.2305(6) 0.0523(17) Uani 1 1 d . . .
O6 O -0.0723(6) 0.6421(5) -0.0248(6) 0.0442(15) Uani 1 1 d . . .
O8 O 0.5505(5) 1.2789(5) 0.5665(5) 0.0385(14) Uani 1 1 d . . .
O9 O 0.3376(5) 1.3093(5) 0.8014(5) 0.0428(15) Uani 1 1 d . . .
O10 O 0.4962(6) 1.6117(5) 0.7350(5) 0.0445(15) Uani 1 1 d . . .
C1 C 0.2139(6) 0.7748(6) 0.2352(6) 0.0232(16) Uani 1 1 d . . .
C2 C 0.2758(7) 0.7154(6) 0.1510(6) 0.0246(16) Uani 1 1 d . . .
C3 C 0.2683(7) 0.5936(6) 0.1299(7) 0.0294(18) Uani 1 1 d . . .
H3 H 0.2139 0.5487 0.1617 0.035 Uiso 1 1 calc R . .
C4 C 0.3206(7) 0.5368(7) 0.0485(7) 0.0305(18) Uani 1 1 d . . .
H4 H 0.3015 0.4528 0.0233 0.037 Uiso 1 1 calc R . .
C5 C 0.3806(7) 0.6010(7) -0.0150(7) 0.0344(19) Uani 1 1 d . . .
H5 H 0.4013 0.5604 -0.0837 0.041 Uiso 1 1 calc R . .
C6 C 0.3877(7) 0.7200(7) 0.0039(7) 0.0337(19) Uani 1 1 d . . .
H6 H 0.4136 0.7623 -0.0514 0.040 Uiso 1 1 calc R . .
C7 C 0.3357(7) 0.7803(7) 0.0898(7) 0.0294(18) Uani 1 1 d . . .
H7 H 0.3272 0.8627 0.0927 0.035 Uiso 1 1 calc R . .
C8 C 0.1177(8) 0.5255(8) -0.1691(8) 0.038(2) Uani 1 1 d . . .
C9 C 0.1396(8) 0.7456(7) -0.1571(8) 0.038(2) Uani 1 1 d . . .
C10 C 0.0271(8) 0.6461(6) -0.0306(7) 0.0326(19) Uani 1 1 d . . .
C11 C 0.1324(7) 1.1595(6) 0.4330(6) 0.0252(16) Uani 1 1 d . . .
C12 C 0.1633(7) 1.2868(6) 0.4422(6) 0.0241(16) Uani 1 1 d . . .
C13 C 0.2415(7) 1.3299(7) 0.3791(7) 0.0272(17) Uani 1 1 d . . .
H13 H 0.2858 1.2759 0.3406 0.033 Uiso 1 1 calc R . .
C14 C 0.2724(8) 1.4486(7) 0.3895(7) 0.036(2) Uani 1 1 d . . .
H14 H 0.3377 1.4767 0.3585 0.044 Uiso 1 1 calc R . .
C15 C 0.2280(8) 1.5251(7) 0.4640(7) 0.035(2) Uani 1 1 d . . .
H15 H 0.2641 1.6064 0.4848 0.042 Uiso 1 1 calc R . .
C16 C 0.1503(7) 1.4862(7) 0.5285(8) 0.0354(19) Uani 1 1 d . . .
H16 H 0.1325 1.5404 0.5909 0.042 Uiso 1 1 calc R . .
C17 C 0.1204(7) 1.3672(6) 0.5176(7) 0.0273(17) Uani 1 1 d . . .
H17 H 0.0819 1.3391 0.5735 0.033 Uiso 1 1 calc R . .
C18 C 0.4657(7) 1.3272(7) 0.5696(7) 0.0275(17) Uani 1 1 d . . .
C19 C 0.4328(7) 1.5297(7) 0.6740(7) 0.0293(18) Uani 1 1 d . . .
C20 C 0.3315(7) 1.3437(7) 0.7148(7) 0.0315(18) Uani 1 1 d . . .
C21 C 0.2388(6) 0.8996(6) 0.5399(6) 0.0243(16) Uani 1 1 d . . .
H21A H 0.1998 0.9194 0.6015 0.029 Uiso 1 1 calc R . .
H21B H 0.2517 0.8187 0.5356 0.029 Uiso 1 1 calc R . .
C22 C 0.3671(8) 0.9733(8) 0.5776(7) 0.039(2) Uani 1 1 d . . .
H22A H 0.3998 0.9622 0.5105 0.047 Uiso 1 1 calc R . .
H22B H 0.3551 1.0541 0.5934 0.047 Uiso 1 1 calc R . .
C23 C 0.4642(7) 0.9453(8) 0.6891(7) 0.036(2) Uani 1 1 d . . .
H23A H 0.5442 0.9899 0.7021 0.043 Uiso 1 1 calc R . .
H23B H 0.4752 0.8642 0.6735 0.043 Uiso 1 1 calc R . .
C24 C 0.4303(8) 0.9698(8) 0.8057(8) 0.040(2) Uani 1 1 d . . .
H24A H 0.4193 1.0500 0.8223 0.061 Uiso 1 1 calc R . .
H24B H 0.4969 0.9518 0.8722 0.061 Uiso 1 1 calc R . .
H24C H 0.3534 0.9231 0.7955 0.061 Uiso 1 1 calc R . .
C25 C -0.0688(7) 0.8913(7) 0.2464(7) 0.0316(18) Uani 1 1 d . . .
H25A H -0.1019 0.8119 0.2408 0.038 Uiso 1 1 calc R . .
H25B H -0.1217 0.9410 0.2764 0.038 Uiso 1 1 calc R . .
C26 C -0.0760(7) 0.9120(8) 0.1194(7) 0.0334(19) Uani 1 1 d . . .
H26A H -0.0183 0.8671 0.0914 0.040 Uiso 1 1 calc R . .
H26B H -0.0506 0.9930 0.1230 0.040 Uiso 1 1 calc R . .
C27 C -0.2106(8) 0.8774(9) 0.0296(7) 0.047(2) Uani 1 1 d . . .
H27A H -0.2382 0.7983 0.0315 0.057 Uiso 1 1 calc R . .
H27B H -0.2669 0.9264 0.0549 0.057 Uiso 1 1 calc R . .
C28 C -0.2190(10) 0.8876(9) -0.0969(8) 0.057(3) Uani 1 1 d . . .
H28A H -0.2022 0.9674 -0.1013 0.085 Uiso 1 1 calc R . .
H28B H -0.3021 0.8575 -0.1511 0.085 Uiso 1 1 calc R . .
H28C H -0.1582 0.8445 -0.1197 0.085 Uiso 1 1 calc R . .
 
loop_
 _atom_site_aniso_label
 _atom_site_aniso_U_11
 _atom_site_aniso_U_22
 _atom_site_aniso_U_33
 _atom_site_aniso_U_23
 _atom_site_aniso_U_13
 _atom_site_aniso_U_12
O7 0.043(4) 0.055(4) 0.061(4) -0.010(4) 0.033(3) -0.011(3)
Sn1 0.0195(3) 0.0244(3) 0.0355(3) 0.0072(2) 0.0143(2) -0.0002(2)
Cr1 0.0183(6) 0.0222(6) 0.0366(7) 0.0081(5) 0.0141(5) 0.0002(5)
Cr2 0.0263(7) 0.0295(7) 0.0376(7) 0.0075(6) 0.0165(6) 0.0014(6)
O1 0.022(3) 0.024(3) 0.039(3) 0.005(2) 0.014(2) 0.002(2)
O2 0.027(3) 0.035(3) 0.038(3) 0.009(3) 0.019(3) 0.000(2)
O3 0.026(3) 0.024(3) 0.042(3) 0.009(2) 0.017(3) 0.005(2)
O4 0.018(3) 0.031(3) 0.035(3) 0.011(2) 0.014(2) 0.000(2)
O5 0.042(4) 0.056(4) 0.062(4) 0.032(4) 0.015(3) -0.004(3)
O6 0.032(4) 0.040(4) 0.064(4) 0.004(3) 0.024(3) 0.004(3)
O8 0.022(3) 0.041(3) 0.056(4) 0.006(3) 0.018(3) 0.009(3)
O9 0.032(3) 0.063(4) 0.038(3) 0.025(3) 0.012(3) -0.003(3)
O10 0.043(4) 0.033(3) 0.053(4) -0.006(3) 0.017(3) -0.005(3)
C1 0.014(4) 0.029(4) 0.027(4) 0.007(3) 0.006(3) 0.003(3)
C2 0.019(4) 0.030(4) 0.027(4) 0.006(3) 0.010(3) 0.004(3)
C3 0.023(4) 0.028(4) 0.037(4) 0.010(3) 0.007(4) 0.004(3)
C4 0.022(4) 0.031(4) 0.037(4) 0.004(4) 0.008(4) 0.008(3)
C5 0.027(4) 0.046(5) 0.032(4) 0.009(4) 0.011(4) 0.011(4)
C6 0.014(4) 0.044(5) 0.045(5) 0.008(4) 0.014(4) -0.006(3)
C7 0.019(4) 0.033(4) 0.041(5) 0.011(4) 0.014(4) 0.002(3)
C8 0.032(5) 0.047(5) 0.040(5) 0.001(4) 0.023(4) -0.005(4)
C9 0.032(5) 0.038(5) 0.046(5) 0.018(4) 0.014(4) -0.004(4)
C10 0.037(5) 0.021(4) 0.045(5) 0.005(4) 0.022(4) 0.005(3)
C11 0.017(4) 0.032(4) 0.026(4) 0.007(3) 0.005(3) 0.001(3)
C12 0.017(4) 0.026(4) 0.031(4) 0.011(3) 0.007(3) -0.004(3)
C13 0.019(4) 0.034(4) 0.031(4) 0.008(3) 0.010(3) 0.003(3)
C14 0.025(4) 0.041(5) 0.045(5) 0.016(4) 0.012(4) -0.008(4)
C15 0.028(5) 0.030(4) 0.049(5) 0.020(4) 0.010(4) 0.003(4)
C16 0.021(4) 0.031(5) 0.050(5) 0.007(4) 0.007(4) 0.004(3)
C17 0.021(4) 0.030(4) 0.038(4) 0.015(3) 0.014(3) 0.009(3)
C18 0.017(4) 0.030(4) 0.032(4) 0.007(3) 0.004(3) -0.003(3)
C19 0.021(4) 0.038(5) 0.037(4) 0.008(4) 0.019(4) 0.008(4)
C20 0.021(4) 0.034(5) 0.042(5) 0.009(4) 0.013(4) 0.000(3)
C21 0.015(4) 0.021(4) 0.039(4) 0.003(3) 0.015(3) 0.002(3)
C22 0.027(5) 0.052(6) 0.042(5) 0.013(4) 0.017(4) -0.001(4)
C23 0.019(4) 0.047(5) 0.045(5) 0.005(4) 0.016(4) 0.000(4)
C24 0.020(4) 0.053(6) 0.049(5) 0.004(4) 0.018(4) -0.007(4)
C25 0.024(4) 0.034(5) 0.042(5) 0.005(4) 0.018(4) -0.001(3)
C26 0.021(4) 0.048(5) 0.035(4) 0.005(4) 0.014(4) 0.011(4)
C27 0.035(5) 0.077(7) 0.035(5) 0.011(5) 0.016(4) 0.017(5)
C28 0.046(6) 0.073(7) 0.051(6) 0.019(5) 0.010(5) 0.017(5)
 
_geom_special_details
;
 All esds (except the esd in the dihedral angle between two l.s. planes)
 are estimated using the full covariance matrix.  The cell esds are taken
 into account individually in the estimation of esds in distances, angles
 and torsion angles; correlations between esds in cell parameters are only
 used when they are defined by crystal symmetry.  An approximate (isotropic)
 treatment of cell esds is used for estimating esds involving l.s. planes.
;
 
loop_
 _geom_bond_atom_site_label_1
 _geom_bond_atom_site_label_2
 _geom_bond_distance
 _geom_bond_site_symmetry_2
 _geom_bond_publ_flag
O7 C8 1.168(9) . ?
Sn1 C21 2.101(7) . ?
Sn1 C25 2.112(8) . ?
Sn1 O3 2.114(5) . ?
Sn1 O1 2.133(5) . ?
Cr1 C19 1.847(9) . ?
Cr1 C18 1.862(8) . ?
Cr1 C20 1.879(8) . ?
Cr1 C17 2.198(8) . ?
Cr1 C13 2.207(7) . ?
Cr1 C15 2.207(8) . ?
Cr1 C12 2.215(7) . ?
Cr1 C16 2.223(8) . ?
Cr1 C14 2.231(8) . ?
Cr2 C8 1.840(9) . ?
Cr2 C9 1.850(8) . ?
Cr2 C10 1.859(9) . ?
Cr2 C3 2.190(7) . ?
Cr2 C2 2.199(7) . ?
Cr2 C4 2.207(8) . ?
Cr2 C6 2.221(7) . ?
Cr2 C5 2.222(8) . ?
Cr2 C7 2.227(8) . ?
O1 C1 1.288(9) . ?
O2 C1 1.250(9) . ?
O3 C11 1.296(9) . ?
O4 C11 1.234(9) . ?
O5 C9 1.166(9) . ?
O6 C10 1.143(10) . ?
O8 C18 1.150(9) . ?
O9 C20 1.139(9) . ?
O10 C19 1.158(9) . ?
C1 C2 1.503(10) . ?
C2 C7 1.404(10) . ?
C2 C3 1.413(10) . ?
C3 C4 1.391(11) . ?
C4 C5 1.420(11) . ?
C5 C6 1.382(11) . ?
C6 C7 1.446(11) . ?
C11 C12 1.499(10) . ?
C12 C17 1.417(10) . ?
C12 C13 1.435(10) . ?
C13 C14 1.399(11) . ?
C14 C15 1.393(12) . ?
C15 C16 1.426(11) . ?
C16 C17 1.399(11) . ?
C21 C22 1.536(10) . ?
C22 C23 1.517(11) . ?
C23 C24 1.534(11) . ?
C25 C26 1.533(10) . ?
C26 C27 1.537(11) . ?
C27 C28 1.490(12) . ?
 
loop_
 _geom_angle_atom_site_label_1
 _geom_angle_atom_site_label_2
 _geom_angle_atom_site_label_3
 _geom_angle
 _geom_angle_site_symmetry_1
 _geom_angle_site_symmetry_3
 _geom_angle_publ_flag
C21 Sn1 C25 146.5(3) . . ?
C21 Sn1 O3 103.0(2) . . ?
C25 Sn1 O3 103.7(3) . . ?
C21 Sn1 O1 101.8(2) . . ?
C25 Sn1 O1 102.1(2) . . ?
O3 Sn1 O1 80.92(19) . . ?
C19 Cr1 C18 90.1(3) . . ?
C19 Cr1 C20 87.9(3) . . ?
C18 Cr1 C20 88.8(3) . . ?
C19 Cr1 C17 129.6(3) . . ?
C18 Cr1 C17 139.8(3) . . ?
C20 Cr1 C17 87.0(3) . . ?
C19 Cr1 C13 139.3(3) . . ?
C18 Cr1 C13 86.8(3) . . ?
C20 Cr1 C13 132.5(3) . . ?
C17 Cr1 C13 67.6(3) . . ?
C19 Cr1 C15 86.6(3) . . ?
C18 Cr1 C15 131.1(3) . . ?
C20 Cr1 C15 139.7(3) . . ?
C17 Cr1 C15 66.8(3) . . ?
C13 Cr1 C15 66.0(3) . . ?
C19 Cr1 C12 164.0(3) . . ?
C18 Cr1 C12 104.4(3) . . ?
C20 Cr1 C12 98.9(3) . . ?
C17 Cr1 C12 37.5(3) . . ?
C13 Cr1 C12 37.9(3) . . ?
C15 Cr1 C12 78.9(3) . . ?
C19 Cr1 C16 97.3(3) . . ?
C18 Cr1 C16 165.2(3) . . ?
C20 Cr1 C16 104.2(3) . . ?
C17 Cr1 C16 36.9(3) . . ?
C13 Cr1 C16 79.3(3) . . ?
C15 Cr1 C16 37.5(3) . . ?
C12 Cr1 C16 67.1(3) . . ?
C19 Cr1 C14 104.4(3) . . ?
C18 Cr1 C14 98.6(3) . . ?
C20 Cr1 C14 165.6(3) . . ?
C17 Cr1 C14 79.4(3) . . ?
C13 Cr1 C14 36.7(3) . . ?
C15 Cr1 C14 36.6(3) . . ?
C12 Cr1 C14 67.3(3) . . ?
C16 Cr1 C14 67.2(3) . . ?
C8 Cr2 C9 88.3(4) . . ?
C8 Cr2 C10 85.4(4) . . ?
C9 Cr2 C10 88.9(4) . . ?
C8 Cr2 C3 111.8(3) . . ?
C9 Cr2 C3 160.0(3) . . ?
C10 Cr2 C3 92.9(3) . . ?
C8 Cr2 C2 149.1(3) . . ?
C9 Cr2 C2 122.5(3) . . ?
C10 Cr2 C2 91.4(3) . . ?
C3 Cr2 C2 37.6(3) . . ?
C8 Cr2 C4 88.1(4) . . ?
C9 Cr2 C4 150.5(4) . . ?
C10 Cr2 C4 119.9(3) . . ?
C3 Cr2 C4 36.9(3) . . ?
C2 Cr2 C4 67.0(3) . . ?
C8 Cr2 C6 120.4(3) . . ?
C9 Cr2 C6 90.5(3) . . ?
C10 Cr2 C6 154.2(3) . . ?
C3 Cr2 C6 79.3(3) . . ?
C2 Cr2 C6 67.4(3) . . ?
C4 Cr2 C6 66.5(3) . . ?
C8 Cr2 C5 92.2(4) . . ?
C9 Cr2 C5 113.6(3) . . ?
C10 Cr2 C5 157.3(3) . . ?
C3 Cr2 C5 67.1(3) . . ?
C2 Cr2 C5 79.2(3) . . ?
C4 Cr2 C5 37.4(3) . . ?
C6 Cr2 C5 36.2(3) . . ?
C8 Cr2 C7 158.1(3) . . ?
C9 Cr2 C7 94.2(3) . . ?
C10 Cr2 C7 116.4(3) . . ?
C3 Cr2 C7 67.2(3) . . ?
C2 Cr2 C7 37.0(3) . . ?
C4 Cr2 C7 79.1(3) . . ?
C6 Cr2 C7 37.9(3) . . ?
C5 Cr2 C7 66.9(3) . . ?
C1 O1 Sn1 102.5(4) . . ?
C11 O3 Sn1 104.9(4) . . ?
O2 C1 O1 120.8(7) . . ?
O2 C1 C2 121.3(7) . . ?
O1 C1 C2 118.0(6) . . ?
C7 C2 C3 120.4(7) . . ?
C7 C2 C1 120.1(7) . . ?
C3 C2 C1 119.4(7) . . ?
C7 C2 Cr2 72.6(4) . . ?
C3 C2 Cr2 70.9(4) . . ?
C1 C2 Cr2 126.6(5) . . ?
C4 C3 C2 120.3(7) . . ?
C4 C3 Cr2 72.2(4) . . ?
C2 C3 Cr2 71.6(4) . . ?
C3 C4 C5 120.2(8) . . ?
C3 C4 Cr2 70.9(4) . . ?
C5 C4 Cr2 71.9(4) . . ?
C6 C5 C4 120.2(8) . . ?
C6 C5 Cr2 71.8(5) . . ?
C4 C5 Cr2 70.7(4) . . ?
C5 C6 C7 120.2(7) . . ?
C5 C6 Cr2 71.9(5) . . ?
C7 C6 Cr2 71.3(4) . . ?
C2 C7 C6 118.8(7) . . ?
C2 C7 Cr2 70.4(4) . . ?
C6 C7 Cr2 70.8(4) . . ?
O7 C8 Cr2 177.9(7) . . ?
O5 C9 Cr2 178.1(8) . . ?
O6 C10 Cr2 178.2(8) . . ?
O4 C11 O3 122.7(7) . . ?
O4 C11 C12 122.1(7) . . ?
O3 C11 C12 115.2(6) . . ?
C17 C12 C13 118.6(7) . . ?
C17 C12 C11 120.5(7) . . ?
C13 C12 C11 120.9(7) . . ?
C17 C12 Cr1 70.6(4) . . ?
C13 C12 Cr1 70.8(4) . . ?
C11 C12 Cr1 128.0(5) . . ?
C14 C13 C12 120.9(7) . . ?
C14 C13 Cr1 72.6(5) . . ?
C12 C13 Cr1 71.4(4) . . ?
C15 C14 C13 119.0(8) . . ?
C15 C14 Cr1 70.8(5) . . ?
C13 C14 Cr1 70.7(4) . . ?
C14 C15 C16 122.0(8) . . ?
C14 C15 Cr1 72.7(5) . . ?
C16 C15 Cr1 71.9(4) . . ?
C17 C16 C15 118.4(8) . . ?
C17 C16 Cr1 70.6(4) . . ?
C15 C16 Cr1 70.6(5) . . ?
C16 C17 C12 121.1(7) . . ?
C16 C17 Cr1 72.5(4) . . ?
C12 C17 Cr1 71.9(4) . . ?
O8 C18 Cr1 178.9(7) . . ?
O10 C19 Cr1 177.7(7) . . ?
O9 C20 Cr1 178.2(7) . . ?
C22 C21 Sn1 112.5(5) . . ?
C23 C22 C21 113.9(7) . . ?
C22 C23 C24 114.5(7) . . ?
C26 C25 Sn1 112.9(5) . . ?
C25 C26 C27 110.7(7) . . ?
C28 C27 C26 112.2(8) . . ?
 
_diffrn_measured_fraction_theta_max    0.970
_diffrn_reflns_theta_full              25.50
_diffrn_measured_fraction_theta_full   0.970
_refine_diff_density_max    3.016
_refine_diff_density_min   -1.049
_refine_diff_density_rms    0.169
#=============end
data_complex3
 
_audit_creation_method            SHELXL-97
_chemical_name_systematic
;
 ?
;
_chemical_name_common             ?
_chemical_melting_point           ?
_chemical_formula_moiety          'C36 H48 Cr2 O12 Sn2'
_chemical_formula_sum
 'C36 H48 Cr2 O12 Sn2'
_chemical_formula_weight          1014.16
 
loop_
 _atom_type_symbol
 _atom_type_description
 _atom_type_scat_dispersion_real
 _atom_type_scat_dispersion_imag
 _atom_type_scat_source
 'C'  'C'   0.0033   0.0016
 'International Tables Vol C Tables 4.2.6.8 and 6.1.1.4'
 'H'  'H'   0.0000   0.0000
 'International Tables Vol C Tables 4.2.6.8 and 6.1.1.4'
 'O'  'O'   0.0106   0.0060
 'International Tables Vol C Tables 4.2.6.8 and 6.1.1.4'
 'Sn'  'Sn'  -0.6537   1.4246
 'International Tables Vol C Tables 4.2.6.8 and 6.1.1.4'
 'Cr'  'Cr'   0.3209   0.6236
 'International Tables Vol C Tables 4.2.6.8 and 6.1.1.4'
 'Cl'  'Cl'   0.1484   0.1585
 'International Tables Vol C Tables 4.2.6.8 and 6.1.1.4'
 
_symmetry_cell_setting            'triclinic'
_symmetry_space_group_name_H-M          'P -1'
 _symmetry_space_group_name_Hall '-P 1'
loop_
 _symmetry_equiv_pos_as_xyz
 'x, y, z'
 '-x, -y, -z'
 
_cell_length_a                    11.415(5)
_cell_length_b                    12.170(5)
_cell_length_c                    15.433(5)
_cell_angle_alpha                 89.680(5)
_cell_angle_beta                  73.644(5)
_cell_angle_gamma                 89.977(5)
_cell_volume                      2057.2(14)
_cell_formula_units_Z             2
_cell_measurement_temperature     100(2)
_cell_measurement_reflns_used     3882
_cell_measurement_theta_min       2.50
_cell_measurement_theta_max       28.00
 
_exptl_crystal_description        'block'
_exptl_crystal_colour            'dark yellow'
_exptl_crystal_size_max           0.14
_exptl_crystal_size_mid           0.13
_exptl_crystal_size_min           0.10
_exptl_crystal_density_meas       ?
_exptl_crystal_density_diffrn     1.637
_exptl_crystal_density_method     'not measured'
_exptl_crystal_F_000              1016.0
_exptl_absorpt_coefficient_mu     1.771
_exptl_absorpt_correction_type    'empirical'
_exptl_absorpt_correction_T_min   0.780
_exptl_absorpt_correction_T_max   0.838
_exptl_absorpt_process_details    'sadabs'
 
_exptl_special_details
;
 ?
;
 
_diffrn_ambient_temperature       100(2)
_diffrn_radiation_wavelength      0.71069
_diffrn_radiation_type            MoK\a
_diffrn_radiation_source          'fine-focus sealed tube'
_diffrn_radiation_monochromator   graphite
_diffrn_measurement_device_type   'CCD area detector'
_diffrn_measurement_method        'phi and omega scans'
_diffrn_detector_area_resol_mean  ?
_diffrn_standards_number          ?
_diffrn_standards_interval_count  ?
_diffrn_standards_interval_time   ?
_diffrn_standards_decay_%         ?
_diffrn_reflns_number             10017
_diffrn_reflns_av_R_equivalents   0.0278
_diffrn_reflns_av_sigmaI/netI     0.0584
_diffrn_reflns_limit_h_min        -13
_diffrn_reflns_limit_h_max        13
_diffrn_reflns_limit_k_min        -12
_diffrn_reflns_limit_k_max        14
_diffrn_reflns_limit_l_min        -17
_diffrn_reflns_limit_l_max        18
_diffrn_reflns_theta_min          4.08
_diffrn_reflns_theta_max          24.71
_reflns_number_total              6774
_reflns_number_gt                 5905
_reflns_threshold_expression      >2sigma(I)
 
_computing_data_collection      'Bruker SMART'
_computing_cell_refinement      'Bruker SMART'
_computing_data_reduction       'Bruker SAINT'
_computing_structure_solution   'Bruker SHELXTL'
_computing_structure_refinement 'Bruker SHELXTL'
_computing_molecular_graphics   'Bruker SHELXTL'
_computing_publication_material 'Bruker SHELXTL'
 
 
_refine_special_details
;
 Refinement of F^2^ against ALL reflections.  The weighted R-factor wR and
 goodness of fit S are based on F^2^, conventional R-factors R are based
 on F, with F set to zero for negative F^2^. The threshold expression of
 F^2^ > 2sigma(F^2^) is used only for calculating R-factors(gt) etc. and is
 not relevant to the choice of reflections for refinement.  R-factors based
 on F^2^ are statistically about twice as large as those based on F, and R-
 factors based on ALL data will be even larger.
;
 
_refine_ls_structure_factor_coef  Fsqd
_refine_ls_matrix_type            full
_refine_ls_weighting_scheme       calc
_refine_ls_weighting_details
 'calc w=1/[\s^2^(Fo^2^)+(0.0000P)^2^+75.7919P] where P=(Fo^2^+2Fc^2^)/3'
_atom_sites_solution_primary      direct
_atom_sites_solution_secondary    difmap
_atom_sites_solution_hydrogens    geom
_refine_ls_hydrogen_treatment     mixed
_refine_ls_extinction_method      none
_refine_ls_extinction_coef        ?
_refine_ls_number_reflns          6774
_refine_ls_number_parameters      489
_refine_ls_number_restraints      8
_refine_ls_R_factor_all           0.1018
_refine_ls_R_factor_gt            0.0917
_refine_ls_wR_factor_ref          0.2050
_refine_ls_wR_factor_gt           0.1987
_refine_ls_goodness_of_fit_ref    1.190
_refine_ls_restrained_S_all       1.190
_refine_ls_shift/su_max           0.000
_refine_ls_shift/su_mean          0.000
 
loop_
 _atom_site_label
 _atom_site_type_symbol
 _atom_site_fract_x
 _atom_site_fract_y
 _atom_site_fract_z
 _atom_site_U_iso_or_equiv
 _atom_site_adp_type
 _atom_site_occupancy
 _atom_site_symmetry_multiplicity
 _atom_site_calc_flag
 _atom_site_refinement_flags
 _atom_site_disorder_assembly
 _atom_site_disorder_group
Sn1 Sn 0.53767(8) 0.37561(7) 1.03981(6) 0.0190(2) Uani 1 1 d . . .
Sn2 Sn 0.52477(8) 0.12923(7) 0.53554(6) 0.0181(2) Uani 1 1 d . . .
Cr1 Cr 1.01259(19) 0.36270(16) 0.36401(14) 0.0193(5) Uani 1 1 d . . .
Cr2 Cr 1.02064(19) 0.14089(17) 0.85627(15) 0.0214(5) Uani 1 1 d . . .
O1 O 0.7733(8) 0.3710(7) 0.8378(6) 0.023(2) Uani 1 1 d . . .
O2 O 0.6794(8) 0.2685(7) 0.9593(6) 0.0213(19) Uani 1 1 d . . .
O7 O 0.6805(8) 0.2288(7) 0.4625(6) 0.0207(19) Uani 1 1 d . . .
O9 O 0.7785(8) 0.1294(7) 0.3415(6) 0.023(2) Uani 1 1 d . . .
O5 O 1.2200(9) 0.0016(9) 0.8913(7) 0.038(3) Uani 1 1 d . . .
O10 O 0.9592(10) 0.2817(10) 0.5560(8) 0.048(3) Uani 1 1 d . . .
O6 O 1.2117(11) 0.3116(10) 0.7790(9) 0.054(3) Uani 1 1 d . . .
O12 O 1.2256(9) 0.4921(8) 0.3870(7) 0.036(2) Uani 1 1 d . . .
O11 O 1.1770(10) 0.1690(10) 0.3108(9) 0.052(3) Uani 1 1 d . . .
O4 O 0.9898(12) 0.2402(11) 1.0371(9) 0.056(3) Uani 1 1 d . . .
O8 O 0.5940(8) 0.0146(7) 0.4413(6) 0.022(2) Uani 1 1 d D . .
O3 O 0.5805(9) 0.4783(7) 0.9310(6) 0.026(2) Uani 1 1 d D . .
C1 C 0.7592(11) 0.2140(11) 0.3852(9) 0.022(3) Uani 1 1 d . . .
C2 C 0.8343(11) 0.3150(10) 0.3476(9) 0.018(3) Uani 1 1 d . . .
C3 C 0.8187(11) 0.4143(10) 0.3996(9) 0.021(3) Uani 1 1 d . . .
H3 H 0.7690 0.4143 0.4628 0.025 Uiso 1 1 calc R . .
C4 C 0.8923(11) 0.5049(10) 0.3635(9) 0.020(3) Uani 1 1 d . . .
H4 H 0.8946 0.5666 0.4036 0.024 Uiso 1 1 calc R . .
C5 C 0.9808(11) 0.5007(10) 0.2797(9) 0.022(3) Uani 1 1 d . . .
H5 H 1.0414 0.5596 0.2616 0.026 Uiso 1 1 calc R . .
C6 C 0.9931(11) 0.4041(10) 0.2282(9) 0.020(3) Uani 1 1 d . . .
H6 H 1.0633 0.3958 0.1748 0.024 Uiso 1 1 calc R . .
C7 C 0.9218(12) 0.3136(11) 0.2631(8) 0.021(3) Uani 1 1 d . . .
H7 H 0.9436 0.2427 0.2330 0.025 Uiso 1 1 calc R . .
C8 C 0.7579(12) 0.2857(10) 0.8829(9) 0.020(3) Uani 1 1 d . . .
C9 C 0.8341(12) 0.1863(11) 0.8469(9) 0.023(3) Uani 1 1 d . . .
C10 C 0.9180(11) 0.1887(10) 0.7585(8) 0.017(3) Uani 1 1 d U . .
H10 H 0.9364 0.2591 0.7263 0.021 Uiso 1 1 calc R . .
C11 C 0.9876(13) 0.0978(11) 0.7242(9) 0.028(3) Uani 1 1 d . . .
H11 H 1.0548 0.1059 0.6686 0.034 Uiso 1 1 calc R . .
C12 C 0.9819(13) 0.0015(11) 0.7771(10) 0.028(3) Uani 1 1 d . . .
H12 H 1.0416 -0.0576 0.7572 0.034 Uiso 1 1 calc R . .
C13 C 0.8280(12) 0.0899(10) 0.8984(9) 0.022(3) Uani 1 1 d . . .
H13 H 0.7833 0.0911 0.9627 0.026 Uiso 1 1 calc R . .
C16 C 0.8972(12) -0.0018(10) 0.8636(9) 0.022(3) Uani 1 1 d . . .
H16 H 0.9008 -0.0630 0.9043 0.027 Uiso 1 1 calc R . .
C19 C 0.5815(14) 0.1256(12) 0.6572(10) 0.032(3) Uani 1 1 d . . .
C21 C 0.9996(14) 0.2039(12) 0.9691(10) 0.034(3) Uani 1 1 d . . .
C22 C 0.9805(13) 0.3132(13) 0.4822(11) 0.033(4) Uani 1 1 d . . .
C23 C 1.1432(13) 0.0551(11) 0.8770(9) 0.027(3) Uani 1 1 d . . .
C24 C 1.1439(12) 0.4423(10) 0.3779(9) 0.021(3) Uani 1 1 d . . .
C25 C 0.2750(14) 0.2973(14) 1.0986(13) 0.048(4) Uani 1 1 d . . .
H25A H 0.2532 0.3588 1.0671 0.072 Uiso 1 1 calc R . .
H25B H 0.2787 0.3203 1.1572 0.072 Uiso 1 1 calc R . .
H25C H 0.2148 0.2405 1.1052 0.072 Uiso 1 1 calc R . .
C27 C 1.1159(14) 0.2443(12) 0.3305(11) 0.035(4) Uani 1 1 d . . .
C28 C 1.1346(15) 0.2482(13) 0.8091(13) 0.043(4) Uani 1 1 d . . .
C29 C 0.4308(16) 0.2443(13) 0.3937(11) 0.042(4) Uani 1 1 d . . .
H29A H 0.4217 0.1710 0.3738 0.063 Uiso 1 1 calc R . .
H29B H 0.5137 0.2681 0.3688 0.063 Uiso 1 1 calc R . .
H29C H 0.3772 0.2929 0.3737 0.063 Uiso 1 1 calc R . .
C31 C 0.4231(18) 0.3593(14) 0.5307(14) 0.056(5) Uani 1 1 d . . .
H31A H 0.5026 0.3852 0.4975 0.084 Uiso 1 1 calc R . .
H31B H 0.4193 0.3526 0.5935 0.084 Uiso 1 1 calc R . .
H31C H 0.3624 0.4106 0.5239 0.084 Uiso 1 1 calc R . .
C32 C 0.6472(15) 0.4031(13) 1.1360(10) 0.038(4) Uani 1 1 d . . .
C33 C 0.4864(19) 0.0652(14) 0.7313(11) 0.052(5) Uani 1 1 d . . .
H33A H 0.4779 -0.0088 0.7125 0.078 Uiso 1 1 calc R . .
H33B H 0.4094 0.1023 0.7427 0.078 Uiso 1 1 calc R . .
H33C H 0.5119 0.0638 0.7855 0.078 Uiso 1 1 calc R . .
C34 C 0.4294(16) 0.1494(13) 1.0917(14) 0.053(5) Uani 1 1 d . . .
H34A H 0.3775 0.0902 1.0843 0.080 Uiso 1 1 calc R . .
H34B H 0.4165 0.1632 1.1549 0.080 Uiso 1 1 calc R . .
H34C H 0.5132 0.1298 1.0649 0.080 Uiso 1 1 calc R . .
C40 C 0.3992(12) 0.2459(11) 0.4942(12) 0.037(4) Uani 1 1 d . . .
C46 C 0.3993(17) 0.2319(17) 0.9494(16) 0.067(6) Uani 1 1 d . . .
H46A H 0.3360 0.1802 0.9489 0.101 Uiso 1 1 calc R . .
H46B H 0.4770 0.2022 0.9166 0.101 Uiso 1 1 calc R . .
H46C H 0.3852 0.2994 0.9214 0.101 Uiso 1 1 calc R . .
C53 C 0.2687(13) 0.2093(13) 0.5340(12) 0.039(4) Uani 1 1 d . . .
H53A H 0.2146 0.2657 0.5248 0.059 Uiso 1 1 calc R . .
H53B H 0.2540 0.1960 0.5976 0.059 Uiso 1 1 calc R . .
H53C H 0.2546 0.1430 0.5051 0.059 Uiso 1 1 calc R . .
C61 C 0.6681(19) 0.2866(14) 1.1675(12) 0.052(5) Uani 1 1 d . . .
H61A H 0.7171 0.2457 1.1173 0.078 Uiso 1 1 calc R . .
H61B H 0.5909 0.2505 1.1913 0.078 Uiso 1 1 calc R . .
H61C H 0.7095 0.2909 1.2136 0.078 Uiso 1 1 calc R . .
C65 C 0.7003(18) 0.0694(14) 0.6378(12) 0.052(5) Uani 1 1 d . . .
H65A H 0.7573 0.1049 0.5877 0.078 Uiso 1 1 calc R . .
H65B H 0.6906 -0.0060 0.6231 0.078 Uiso 1 1 calc R . .
H65C H 0.7302 0.0727 0.6899 0.078 Uiso 1 1 calc R . .
C68 C 0.598(2) 0.2439(14) 0.6827(11) 0.055(5) Uani 1 1 d . . .
H68A H 0.6385 0.2450 0.7293 0.083 Uiso 1 1 calc R . .
H68B H 0.5192 0.2781 0.7044 0.083 Uiso 1 1 calc R . .
H68C H 0.6458 0.2831 0.6307 0.083 Uiso 1 1 calc R . .
C73 C 0.3989(14) 0.2537(13) 1.0453(13) 0.042(4) Uani 1 1 d . . .
C90 C 0.568(2) 0.4686(14) 1.2179(11) 0.055(5) Uani 1 1 d . . .
H90A H 0.6122 0.4762 1.2622 0.083 Uiso 1 1 calc R . .
H90B H 0.4933 0.4299 1.2440 0.083 Uiso 1 1 calc R . .
H90C H 0.5507 0.5400 1.1981 0.083 Uiso 1 1 calc R . .
C98 C 0.7613(17) 0.4615(15) 1.0880(13) 0.053(5) Uani 1 1 d . . .
H98A H 0.8034 0.4838 1.1308 0.080 Uiso 1 1 calc R . .
H98B H 0.7417 0.5251 1.0578 0.080 Uiso 1 1 calc R . .
H98C H 0.8126 0.4133 1.0444 0.080 Uiso 1 1 calc R . .
H3H H 0.660(4) 0.475(11) 0.900(8) 0.02(4) Uiso 1 1 d D . .
H8H H 0.540(10) 0.035(11) 0.412(8) 0.03(4) Uiso 1 1 d D . .
 
loop_
 _atom_site_aniso_label
 _atom_site_aniso_U_11
 _atom_site_aniso_U_22
 _atom_site_aniso_U_33
 _atom_site_aniso_U_23
 _atom_site_aniso_U_13
 _atom_site_aniso_U_12
Sn1 0.0213(5) 0.0169(5) 0.0185(5) 0.0015(3) -0.0053(4) 0.0031(3)
Sn2 0.0209(5) 0.0148(4) 0.0183(5) -0.0011(3) -0.0048(4) -0.0052(3)
Cr1 0.0203(11) 0.0159(10) 0.0241(11) 0.0029(8) -0.0105(9) -0.0074(8)
Cr2 0.0217(11) 0.0187(11) 0.0254(12) -0.0014(9) -0.0094(9) -0.0036(8)
O1 0.023(5) 0.020(5) 0.024(5) 0.004(4) -0.005(4) 0.002(4)
O2 0.022(5) 0.018(4) 0.023(5) 0.003(4) -0.005(4) 0.005(4)
O7 0.017(4) 0.018(4) 0.024(5) -0.007(4) -0.001(4) -0.003(4)
O9 0.021(5) 0.015(5) 0.028(5) -0.005(4) 0.000(4) -0.008(4)
O5 0.027(6) 0.042(6) 0.047(7) 0.000(5) -0.013(5) 0.009(5)
O10 0.050(7) 0.068(8) 0.036(7) 0.030(6) -0.032(6) -0.030(6)
O6 0.049(7) 0.042(7) 0.085(10) 0.019(6) -0.042(7) -0.027(6)
O12 0.030(6) 0.033(6) 0.046(7) 0.000(5) -0.013(5) -0.011(5)
O11 0.044(7) 0.048(7) 0.081(9) -0.027(7) -0.043(7) 0.029(6)
O4 0.059(8) 0.065(8) 0.048(8) -0.031(7) -0.023(6) 0.021(7)
O8 0.020(5) 0.020(5) 0.024(5) -0.006(4) -0.005(4) -0.002(4)
O3 0.033(6) 0.020(5) 0.015(5) 0.008(4) 0.008(4) 0.010(4)
C1 0.020(7) 0.024(7) 0.022(7) 0.002(6) -0.008(6) -0.003(5)
C2 0.017(6) 0.017(6) 0.024(7) 0.004(5) -0.009(5) 0.004(5)
C3 0.018(6) 0.019(6) 0.026(7) -0.003(5) -0.005(5) 0.007(5)
C4 0.016(6) 0.017(6) 0.028(7) 0.003(5) -0.009(5) -0.004(5)
C5 0.013(6) 0.022(7) 0.032(8) 0.008(6) -0.012(6) -0.003(5)
C6 0.013(6) 0.024(7) 0.021(7) 0.007(5) -0.004(5) -0.004(5)
C7 0.025(7) 0.028(7) 0.012(6) 0.000(5) -0.009(5) 0.003(6)
C8 0.025(7) 0.012(6) 0.024(7) -0.004(5) -0.010(6) -0.007(5)
C9 0.020(7) 0.024(7) 0.024(7) -0.008(6) -0.005(6) -0.004(5)
C10 0.019(4) 0.020(4) 0.017(4) -0.003(4) -0.010(4) -0.002(4)
C11 0.030(8) 0.032(8) 0.022(7) -0.012(6) -0.006(6) -0.003(6)
C12 0.028(7) 0.020(7) 0.038(9) -0.008(6) -0.011(6) 0.002(6)
C13 0.026(7) 0.022(7) 0.024(7) 0.001(5) -0.018(6) 0.001(5)
C16 0.029(7) 0.012(6) 0.028(7) 0.001(5) -0.011(6) -0.007(5)
C19 0.041(9) 0.037(8) 0.027(8) -0.004(6) -0.021(7) -0.011(7)
C21 0.041(9) 0.035(8) 0.031(9) -0.009(7) -0.019(7) 0.014(7)
C22 0.027(8) 0.041(9) 0.038(9) -0.002(7) -0.020(7) -0.015(7)
C23 0.038(8) 0.021(7) 0.019(7) 0.000(5) -0.002(6) 0.006(6)
C24 0.020(7) 0.022(7) 0.020(7) -0.004(5) -0.005(5) 0.000(5)
C25 0.031(9) 0.045(10) 0.073(13) 0.006(9) -0.020(9) -0.011(7)
C27 0.033(8) 0.024(8) 0.057(10) -0.005(7) -0.027(8) -0.002(7)
C28 0.045(10) 0.027(8) 0.068(12) 0.015(8) -0.035(9) -0.001(7)
C29 0.048(10) 0.036(9) 0.042(10) 0.008(7) -0.014(8) -0.010(7)
C31 0.059(12) 0.034(10) 0.075(14) -0.010(9) -0.020(10) -0.001(8)
C32 0.054(10) 0.046(9) 0.023(8) -0.009(7) -0.023(7) 0.031(8)
C33 0.095(15) 0.042(10) 0.028(9) 0.013(7) -0.030(10) -0.023(10)
C34 0.044(10) 0.032(9) 0.078(14) 0.009(9) -0.008(10) -0.011(8)
C40 0.014(7) 0.017(7) 0.081(13) -0.011(7) -0.011(7) -0.002(5)
C46 0.042(11) 0.055(12) 0.113(19) -0.016(12) -0.034(12) -0.012(9)
C53 0.024(8) 0.036(9) 0.063(11) -0.010(8) -0.022(8) -0.007(6)
C61 0.084(14) 0.045(10) 0.044(10) -0.009(8) -0.045(10) 0.028(9)
C65 0.077(14) 0.042(10) 0.049(11) 0.005(8) -0.037(10) -0.016(9)
C68 0.097(16) 0.044(10) 0.029(9) 0.010(8) -0.024(10) -0.026(10)
C73 0.028(8) 0.030(8) 0.066(12) -0.001(8) -0.009(8) -0.001(7)
C90 0.115(17) 0.042(10) 0.023(9) -0.005(7) -0.043(10) 0.013(10)
C98 0.059(12) 0.053(11) 0.063(12) -0.001(9) -0.044(10) -0.007(9)
 
_geom_special_details
;
 All esds (except the esd in the dihedral angle between two l.s. planes)
 are estimated using the full covariance matrix.  The cell esds are taken
 into account individually in the estimation of esds in distances, angles
 and torsion angles; correlations between esds in cell parameters are only
 used when they are defined by crystal symmetry.  An approximate (isotropic)
 treatment of cell esds is used for estimating esds involving l.s. planes.
;
 
loop_
 _geom_bond_atom_site_label_1
 _geom_bond_atom_site_label_2
 _geom_bond_distance
 _geom_bond_site_symmetry_2
 _geom_bond_publ_flag
Sn1 O3 2.034(8) . ?
Sn1 C73 2.155(16) . ?
Sn1 O2 2.178(8) . ?
Sn1 O3 2.202(9) 2_667 ?
Sn1 C32 2.220(15) . ?
Sn2 O8 2.015(9) . ?
Sn2 C19 2.151(14) . ?
Sn2 O8 2.179(9) 2_656 ?
Sn2 O7 2.181(8) . ?
Sn2 C40 2.232(15) . ?
Cr1 C27 1.844(15) . ?
Cr1 C24 1.848(13) . ?
Cr1 C22 1.853(16) . ?
Cr1 C7 2.186(13) . ?
Cr1 C2 2.199(12) . ?
Cr1 C4 2.210(13) . ?
Cr1 C5 2.211(13) . ?
Cr1 C3 2.217(12) . ?
Cr1 C6 2.224(13) . ?
Cr2 C28 1.840(17) . ?
Cr2 C23 1.843(15) . ?
Cr2 C21 1.860(15) . ?
Cr2 C13 2.199(13) . ?
Cr2 C12 2.212(14) . ?
Cr2 C16 2.219(12) . ?
Cr2 C10 2.230(12) . ?
Cr2 C11 2.240(14) . ?
Cr2 C9 2.243(13) . ?
O1 C8 1.231(15) . ?
O2 C8 1.281(15) . ?
O7 C1 1.289(15) . ?
O9 C1 1.220(15) . ?
O5 C23 1.161(17) . ?
O10 C22 1.160(18) . ?
O6 C28 1.163(19) . ?
O12 C24 1.154(15) . ?
O11 C27 1.140(18) . ?
O4 C21 1.117(18) . ?
O8 Sn2 2.179(9) 2_656 ?
O3 Sn1 2.202(9) 2_667 ?
C1 C2 1.515(17) . ?
C2 C7 1.403(18) . ?
C2 C3 1.437(18) . ?
C3 C4 1.400(17) . ?
C4 C5 1.401(18) . ?
C5 C6 1.407(19) . ?
C6 C7 1.383(18) . ?
C8 C9 1.505(18) . ?
C9 C13 1.403(18) . ?
C9 C10 1.429(18) . ?
C10 C11 1.380(18) . ?
C11 C12 1.42(2) . ?
C12 C16 1.411(19) . ?
C13 C16 1.387(18) . ?
C19 C65 1.47(2) . ?
C19 C68 1.52(2) . ?
C19 C33 1.52(2) . ?
C25 C73 1.52(2) . ?
C29 C40 1.49(2) . ?
C31 C40 1.55(2) . ?
C32 C98 1.48(2) . ?
C32 C61 1.54(2) . ?
C32 C90 1.55(2) . ?
C34 C73 1.54(2) . ?
C40 C53 1.508(19) . ?
C46 C73 1.50(3) . ?
 
loop_
 _geom_angle_atom_site_label_1
 _geom_angle_atom_site_label_2
 _geom_angle_atom_site_label_3
 _geom_angle
 _geom_angle_site_symmetry_1
 _geom_angle_site_symmetry_3
 _geom_angle_publ_flag
O3 Sn1 C73 117.1(6) . . ?
O3 Sn1 O2 85.9(3) . . ?
C73 Sn1 O2 91.6(5) . . ?
O3 Sn1 O3 70.5(4) . 2_667 ?
C73 Sn1 O3 98.5(5) . 2_667 ?
O2 Sn1 O3 156.4(3) . 2_667 ?
O3 Sn1 C32 114.1(6) . . ?
C73 Sn1 C32 128.8(7) . . ?
O2 Sn1 C32 90.4(4) . . ?
O3 Sn1 C32 99.6(5) 2_667 . ?
O8 Sn2 C19 117.8(5) . . ?
O8 Sn2 O8 70.1(4) . 2_656 ?
C19 Sn2 O8 99.8(5) . 2_656 ?
O8 Sn2 O7 85.1(3) . . ?
C19 Sn2 O7 93.3(5) . . ?
O8 Sn2 O7 155.1(3) 2_656 . ?
O8 Sn2 C40 112.8(5) . . ?
C19 Sn2 C40 129.4(6) . . ?
O8 Sn2 C40 97.8(4) 2_656 . ?
O7 Sn2 C40 89.8(4) . . ?
C27 Cr1 C24 88.2(6) . . ?
C27 Cr1 C22 87.7(7) . . ?
C24 Cr1 C22 89.8(6) . . ?
C27 Cr1 C7 88.7(6) . . ?
C24 Cr1 C7 142.3(5) . . ?
C22 Cr1 C7 127.6(5) . . ?
C27 Cr1 C2 107.5(5) . . ?
C24 Cr1 C2 163.7(5) . . ?
C22 Cr1 C2 95.5(5) . . ?
C7 Cr1 C2 37.3(5) . . ?
C27 Cr1 C4 164.0(6) . . ?
C24 Cr1 C4 96.6(5) . . ?
C22 Cr1 C4 107.6(6) . . ?
C7 Cr1 C4 78.2(5) . . ?
C2 Cr1 C4 67.1(4) . . ?
C27 Cr1 C5 128.7(6) . . ?
C24 Cr1 C5 86.8(5) . . ?
C22 Cr1 C5 143.2(6) . . ?
C7 Cr1 C5 66.5(5) . . ?
C2 Cr1 C5 79.7(4) . . ?
C4 Cr1 C5 36.9(5) . . ?
C27 Cr1 C3 143.9(6) . . ?
C24 Cr1 C3 127.4(5) . . ?
C22 Cr1 C3 86.6(6) . . ?
C7 Cr1 C3 67.4(5) . . ?
C2 Cr1 C3 38.0(5) . . ?
C4 Cr1 C3 36.9(4) . . ?
C5 Cr1 C3 67.2(5) . . ?
C27 Cr1 C6 97.8(6) . . ?
C24 Cr1 C6 107.0(5) . . ?
C22 Cr1 C6 162.5(5) . . ?
C7 Cr1 C6 36.6(5) . . ?
C2 Cr1 C6 67.0(4) . . ?
C4 Cr1 C6 66.2(5) . . ?
C5 Cr1 C6 37.0(5) . . ?
C3 Cr1 C6 79.2(5) . . ?
C28 Cr2 C23 89.0(6) . . ?
C28 Cr2 C21 88.0(8) . . ?
C23 Cr2 C21 88.7(6) . . ?
C28 Cr2 C13 148.5(6) . . ?
C23 Cr2 C13 122.3(5) . . ?
C21 Cr2 C13 89.2(6) . . ?
C28 Cr2 C12 123.8(7) . . ?
C23 Cr2 C12 86.6(6) . . ?
C21 Cr2 C12 147.7(6) . . ?
C13 Cr2 C12 66.9(5) . . ?
C28 Cr2 C16 160.4(7) . . ?
C23 Cr2 C16 92.9(6) . . ?
C21 Cr2 C16 111.5(6) . . ?
C13 Cr2 C16 36.6(5) . . ?
C12 Cr2 C16 37.1(5) . . ?
C28 Cr2 C10 89.9(6) . . ?
C23 Cr2 C10 146.3(5) . . ?
C21 Cr2 C10 124.9(5) . . ?
C13 Cr2 C10 66.4(5) . . ?
C12 Cr2 C10 66.4(5) . . ?
C16 Cr2 C10 77.8(5) . . ?
C28 Cr2 C11 95.2(7) . . ?
C23 Cr2 C11 110.7(6) . . ?
C21 Cr2 C11 160.4(6) . . ?
C13 Cr2 C11 77.9(5) . . ?
C12 Cr2 C11 37.1(5) . . ?
C16 Cr2 C11 65.9(5) . . ?
C10 Cr2 C11 36.0(5) . . ?
C28 Cr2 C9 112.3(6) . . ?
C23 Cr2 C9 158.5(6) . . ?
C21 Cr2 C9 94.8(6) . . ?
C13 Cr2 C9 36.8(5) . . ?
C12 Cr2 C9 79.2(5) . . ?
C16 Cr2 C9 66.1(5) . . ?
C10 Cr2 C9 37.3(5) . . ?
C11 Cr2 C9 66.0(5) . . ?
C8 O2 Sn1 130.1(8) . . ?
C1 O7 Sn2 130.7(8) . . ?
Sn2 O8 Sn2 109.9(4) . 2_656 ?
Sn1 O3 Sn1 109.5(4) . 2_667 ?
O9 C1 O7 127.1(12) . . ?
O9 C1 C2 118.7(11) . . ?
O7 C1 C2 114.1(11) . . ?
C7 C2 C3 118.5(11) . . ?
C7 C2 C1 121.3(11) . . ?
C3 C2 C1 120.1(11) . . ?
C7 C2 Cr1 70.8(7) . . ?
C3 C2 Cr1 71.7(7) . . ?
C1 C2 Cr1 127.8(8) . . ?
C4 C3 C2 118.3(12) . . ?
C4 C3 Cr1 71.3(7) . . ?
C2 C3 Cr1 70.3(7) . . ?
C3 C4 C5 122.0(12) . . ?
C3 C4 Cr1 71.8(7) . . ?
C5 C4 Cr1 71.6(7) . . ?
C4 C5 C6 119.2(11) . . ?
C4 C5 Cr1 71.5(7) . . ?
C6 C5 Cr1 72.0(7) . . ?
C7 C6 C5 119.5(12) . . ?
C7 C6 Cr1 70.2(7) . . ?
C5 C6 Cr1 71.0(7) . . ?
C6 C7 C2 122.3(12) . . ?
C6 C7 Cr1 73.2(8) . . ?
C2 C7 Cr1 71.8(7) . . ?
O1 C8 O2 127.3(12) . . ?
O1 C8 C9 119.5(12) . . ?
O2 C8 C9 113.2(11) . . ?
C13 C9 C10 117.8(12) . . ?
C13 C9 C8 122.1(12) . . ?
C10 C9 C8 120.1(12) . . ?
C13 C9 Cr2 69.9(8) . . ?
C10 C9 Cr2 70.9(7) . . ?
C8 C9 Cr2 129.4(9) . . ?
C11 C10 C9 120.8(12) . . ?
C11 C10 Cr2 72.4(8) . . ?
C9 C10 Cr2 71.9(7) . . ?
C10 C11 C12 120.8(13) . . ?
C10 C11 Cr2 71.6(7) . . ?
C12 C11 Cr2 70.4(8) . . ?
C16 C12 C11 118.3(12) . . ?
C16 C12 Cr2 71.7(7) . . ?
C11 C12 Cr2 72.5(8) . . ?
C16 C13 C9 121.3(13) . . ?
C16 C13 Cr2 72.5(8) . . ?
C9 C13 Cr2 73.3(8) . . ?
C13 C16 C12 120.7(12) . . ?
C13 C16 Cr2 70.9(7) . . ?
C12 C16 Cr2 71.2(7) . . ?
C65 C19 C68 108.7(14) . . ?
C65 C19 C33 110.5(14) . . ?
C68 C19 C33 111.9(14) . . ?
C65 C19 Sn2 108.4(11) . . ?
C68 C19 Sn2 107.5(10) . . ?
C33 C19 Sn2 109.7(10) . . ?
O4 C21 Cr2 178.1(14) . . ?
O10 C22 Cr1 179.2(12) . . ?
O5 C23 Cr2 179.0(12) . . ?
O12 C24 Cr1 179.6(13) . . ?
O11 C27 Cr1 178.0(15) . . ?
O6 C28 Cr2 176.1(14) . . ?
C98 C32 C61 113.8(14) . . ?
C98 C32 C90 112.7(16) . . ?
C61 C32 C90 108.9(13) . . ?
C98 C32 Sn1 108.7(10) . . ?
C61 C32 Sn1 103.7(11) . . ?
C90 C32 Sn1 108.5(11) . . ?
C29 C40 C53 109.9(14) . . ?
C29 C40 C31 112.3(14) . . ?
C53 C40 C31 111.7(13) . . ?
C29 C40 Sn2 107.4(10) . . ?
C53 C40 Sn2 109.7(11) . . ?
C31 C40 Sn2 105.6(11) . . ?
C46 C73 C25 110.0(15) . . ?
C46 C73 C34 111.7(15) . . ?
C25 C73 C34 109.6(15) . . ?
C46 C73 Sn1 106.8(12) . . ?
C25 C73 Sn1 109.9(11) . . ?
C34 C73 Sn1 108.9(11) . . ?
 
_diffrn_measured_fraction_theta_max    0.964
_diffrn_reflns_theta_full              24.71
_diffrn_measured_fraction_theta_full   0.964
_refine_diff_density_max    3.469
_refine_diff_density_min   -2.923
_refine_diff_density_rms    0.222
#==============end
data_complex4
 
_audit_creation_method            SHELXL-97
_chemical_name_systematic
;
 ?
;
_chemical_name_common             ?
_chemical_melting_point           ?
_chemical_formula_moiety          'C17 H22 Cr O7 Sn2'
_chemical_formula_sum
 'C17 H22 Cr O7 Sn2'
_chemical_formula_weight          627.73
 
loop_
 _atom_type_symbol
 _atom_type_description
 _atom_type_scat_dispersion_real
 _atom_type_scat_dispersion_imag
 _atom_type_scat_source
 'C'  'C'   0.0033   0.0016
 'International Tables Vol C Tables 4.2.6.8 and 6.1.1.4'
 'H'  'H'   0.0000   0.0000
 'International Tables Vol C Tables 4.2.6.8 and 6.1.1.4'
 'O'  'O'   0.0106   0.0060
 'International Tables Vol C Tables 4.2.6.8 and 6.1.1.4'
 'Cr'  'Cr'   0.3209   0.6236
 'International Tables Vol C Tables 4.2.6.8 and 6.1.1.4'
 'Sn'  'Sn'  -0.6537   1.4246
 'International Tables Vol C Tables 4.2.6.8 and 6.1.1.4'
 
_symmetry_cell_setting            'Triclinic'
_symmetry_space_group_name_H-M    'P -1'
 _symmetry_space_group_name_Hall '-P 1'
loop_
 _symmetry_equiv_pos_as_xyz
 'x, y, z'
 '-x, -y, -z'
 
_cell_length_a                    9.9186(14)
_cell_length_b                    10.343(2)
_cell_length_c                    12.9428(18)
_cell_angle_alpha                 107.696(3)
_cell_angle_beta                  91.561(3)
_cell_angle_gamma                 118.564(2)
_cell_volume                      1087.1(3)
_cell_formula_units_Z             2
_cell_measurement_temperature     100(2)
_cell_measurement_reflns_used      6323
_cell_measurement_theta_min        2.37
_cell_measurement_theta_max       28.30
 
_exptl_crystal_description        'block'
_exptl_crystal_colour             'yellow'
_exptl_crystal_size_max           0.15
_exptl_crystal_size_mid           0.14
_exptl_crystal_size_min           0.13
_exptl_crystal_density_meas       ?
_exptl_crystal_density_diffrn     1.918
_exptl_crystal_density_method     'not measured'
_exptl_crystal_F_000              608
_exptl_absorpt_coefficient_mu     2.803
_exptl_absorpt_correction_type    'empirical'
_exptl_absorpt_correction_T_min   0.663
_exptl_absorpt_correction_T_max   0.695
_exptl_absorpt_process_details    'sadabs'
 
_exptl_special_details
;
 ?
;
 
_diffrn_ambient_temperature       100(2)
_diffrn_radiation_wavelength      0.71073
_diffrn_radiation_type            MoK\a
_diffrn_radiation_source          'fine-focus sealed tube'
_diffrn_radiation_monochromator   graphite
_diffrn_measurement_device_type  'Bruker APEX-II CCD'
_diffrn_measurement_method       '\f and \w scans'
_diffrn_detector_area_resol_mean  ?
_diffrn_standards_number          ?
_diffrn_standards_interval_count  ?
_diffrn_standards_interval_time   ?
_diffrn_standards_decay_%         ?
_diffrn_reflns_number             6814
_diffrn_reflns_av_R_equivalents   0.0198
_diffrn_reflns_av_sigmaI/netI     0.0315
_diffrn_reflns_limit_h_min        -12
_diffrn_reflns_limit_h_max        11
_diffrn_reflns_limit_k_min        -12
_diffrn_reflns_limit_k_max        12
_diffrn_reflns_limit_l_min        -7
_diffrn_reflns_limit_l_max        15
_diffrn_reflns_theta_min          2.37
_diffrn_reflns_theta_max          26.00
_reflns_number_total              4175
_reflns_number_gt                 3884
_reflns_threshold_expression      >2sigma(I)
 
_computing_data_collection       'Bruker APEX2'
_computing_cell_refinement       'Bruker SAINT'
_computing_data_reduction        'Bruker SAINT'
_computing_structure_solution    'SHELXS-97 (Sheldrick 2008)'
_computing_structure_refinement  'SHELXL-2014 (Sheldrick 2014)'
_computing_molecular_graphics    'Bruker SHELXTL'
_computing_publication_material  'Bruker SHELXTL'
 
 
_refine_special_details
;
 Refinement of F^2^ against ALL reflections.  The weighted R-factor wR and
 goodness of fit S are based on F^2^, conventional R-factors R are based
 on F, with F set to zero for negative F^2^. The threshold expression of
 F^2^ > 2sigma(F^2^) is used only for calculating R-factors(gt) etc. and is
 not relevant to the choice of reflections for refinement.  R-factors based
 on F^2^ are statistically about twice as large as those based on F, and R-
 factors based on ALL data will be even larger.
;
 
_refine_ls_structure_factor_coef  Fsqd
_refine_ls_matrix_type            full
_refine_ls_weighting_scheme       calc
_refine_ls_weighting_details
 'calc w=1/[\s^2^(Fo^2^)+(0.0402P)^2^+13.6374P] where P=(Fo^2^+2Fc^2^)/3'
_atom_sites_solution_primary      direct
_atom_sites_solution_secondary    difmap
_atom_sites_solution_hydrogens    geom
_refine_ls_hydrogen_treatment     mixed
_refine_ls_extinction_method      none
_refine_ls_extinction_coef        ?
_refine_ls_number_reflns          4175
_refine_ls_number_parameters      250
_refine_ls_number_restraints      0
_refine_ls_R_factor_all           0.0522
_refine_ls_R_factor_gt            0.0486
_refine_ls_wR_factor_ref          0.1219
_refine_ls_wR_factor_gt           0.1202
_refine_ls_goodness_of_fit_ref    1.186
_refine_ls_restrained_S_all       1.186
_refine_ls_shift/su_max           0.014
_refine_ls_shift/su_mean          0.000
 
loop_
 _atom_site_label
 _atom_site_type_symbol
 _atom_site_fract_x
 _atom_site_fract_y
 _atom_site_fract_z
 _atom_site_U_iso_or_equiv
 _atom_site_adp_type
 _atom_site_occupancy
 _atom_site_symmetry_multiplicity
 _atom_site_calc_flag
 _atom_site_refinement_flags
 _atom_site_disorder_assembly
 _atom_site_disorder_group
Sn2 Sn 1.18267(5) 0.26639(5) 0.68246(4) 0.01565(14) Uani 1 1 d . . .
Sn1 Sn 0.76770(5) 0.42716(5) 0.69333(4) 0.01397(14) Uani 1 1 d . . .
Cr1 Cr 0.67792(13) 0.92996(13) 0.85636(9) 0.0151(2) Uani 1 1 d . . .
O4 O 0.9385(6) 0.0868(6) 0.6603(4) 0.0196(10) Uani 1 1 d . . .
O3 O 0.8556(6) 0.2574(6) 0.7200(5) 0.0223(11) Uani 1 1 d . . .
O1 O 0.6884(6) 0.5779(6) 0.6643(4) 0.0193(10) Uani 1 1 d . . .
O2 O 0.4540(6) 0.4560(6) 0.7032(5) 0.0273(12) Uani 1 1 d . . .
O7 O 0.8228(10) 1.2536(8) 1.0331(6) 0.0502(19) Uani 1 1 d . . .
O5 O 0.5969(9) 0.7989(9) 1.0382(6) 0.0460(17) Uani 1 1 d . . .
C3 C 0.4420(8) 0.7451(8) 0.7558(6) 0.0192(15) Uani 1 1 d . . .
H3 H 0.3696 0.6698 0.7871 0.023 Uiso 1 1 calc R . .
C4 C 0.4497(8) 0.8903(9) 0.7796(6) 0.0204(15) Uani 1 1 d . . .
H4 H 0.3838 0.9141 0.8279 0.024 Uiso 1 1 calc R . .
O6 O 0.9884(8) 0.9420(10) 0.8772(5) 0.0485(19) Uani 1 1 d . . .
C17 C 1.2476(10) 0.0924(9) 0.6514(8) 0.0308(19) Uani 1 1 d . . .
H17A H 1.3552 0.1409 0.6868 0.046 Uiso 1 1 calc R . .
H17B H 1.2351 0.0438 0.5730 0.046 Uiso 1 1 calc R . .
H17C H 1.1820 0.0136 0.6805 0.046 Uiso 1 1 calc R . .
C14 C 0.8378(8) 0.1243(8) 0.6945(6) 0.0165(14) Uani 1 1 d . . .
C1 C 0.5618(8) 0.5695(8) 0.6889(6) 0.0163(14) Uani 1 1 d . . .
C2 C 0.5544(8) 0.7164(8) 0.7048(6) 0.0147(13) Uani 1 1 d . . .
C9 C 0.7671(11) 1.1298(10) 0.9656(7) 0.0285(18) Uani 1 1 d . . .
C8 C 0.6256(10) 0.8455(10) 0.9677(7) 0.0291(18) Uani 1 1 d . . .
C5 C 0.5762(8) 1.0148(8) 0.7578(6) 0.0161(14) Uani 1 1 d . . .
H5 H 0.5944 1.1221 0.7894 0.019 Uiso 1 1 calc R . .
C6 C 0.6903(8) 0.9900(8) 0.7070(6) 0.0148(13) Uani 1 1 d . . .
C7 C 0.6794(8) 0.8419(8) 0.6812(5) 0.0134(13) Uani 1 1 d . . .
H7 H 0.7689 0.8318 0.6598 0.016 Uiso 1 1 calc R . .
C10 C 0.8705(10) 0.9388(11) 0.8739(6) 0.0287(18) Uani 1 1 d . . .
C11 C 0.6292(10) 0.2375(9) 0.5437(6) 0.0255(17) Uani 1 1 d . . .
H11A H 0.5899 0.1395 0.5555 0.038 Uiso 1 1 calc R . .
H11B H 0.6919 0.2403 0.4883 0.038 Uiso 1 1 calc R . .
H11C H 0.5427 0.2463 0.5192 0.038 Uiso 1 1 calc R . .
C12 C 0.7145(11) 0.4523(10) 0.8535(6) 0.0262(17) Uani 1 1 d . . .
H12A H 0.6062 0.3772 0.8468 0.039 Uiso 1 1 calc R . .
H12B H 0.7340 0.5572 0.8898 0.039 Uiso 1 1 calc R . .
H12C H 0.7795 0.4337 0.8963 0.039 Uiso 1 1 calc R . .
C13 C 1.0021(9) 0.5951(9) 0.6926(7) 0.0264(17) Uani 1 1 d . . .
H13A H 1.0748 0.5790 0.7296 0.040 Uiso 1 1 calc R . .
H13B H 1.0221 0.7000 0.7303 0.040 Uiso 1 1 calc R . .
H13C H 1.0147 0.5818 0.6174 0.040 Uiso 1 1 calc R . .
C16 C 1.2075(10) 0.3911(10) 0.8531(6) 0.0268(17) Uani 1 1 d . . .
H16A H 1.1442 0.3178 0.8869 0.040 Uiso 1 1 calc R . .
H16B H 1.1741 0.4658 0.8596 0.040 Uiso 1 1 calc R . .
H16C H 1.3155 0.4459 0.8898 0.040 Uiso 1 1 calc R . .
C15 C 1.1336(11) 0.3255(11) 0.5477(7) 0.0330(19) Uani 1 1 d . . .
H15A H 1.1068 0.2402 0.4792 0.050 Uiso 1 1 calc R . .
H15B H 1.2245 0.4194 0.5474 0.050 Uiso 1 1 calc R . .
H15C H 1.0473 0.3433 0.5556 0.050 Uiso 1 1 calc R . .
 
loop_
 _atom_site_aniso_label
 _atom_site_aniso_U_11
 _atom_site_aniso_U_22
 _atom_site_aniso_U_33
 _atom_site_aniso_U_23
 _atom_site_aniso_U_13
 _atom_site_aniso_U_12
Sn2 0.0142(2) 0.0120(2) 0.0189(3) 0.00542(19) 0.00400(18) 0.00550(19)
Sn1 0.0140(2) 0.0113(2) 0.0154(2) 0.00433(18) 0.00178(17) 0.00591(19)
Cr1 0.0148(5) 0.0151(5) 0.0155(5) 0.0053(4) 0.0032(4) 0.0079(5)
O4 0.014(2) 0.015(2) 0.025(3) 0.006(2) 0.006(2) 0.004(2)
O3 0.024(3) 0.015(3) 0.030(3) 0.011(2) 0.003(2) 0.010(2)
O1 0.020(3) 0.019(3) 0.027(3) 0.012(2) 0.007(2) 0.014(2)
O2 0.018(3) 0.015(3) 0.049(4) 0.015(3) 0.010(2) 0.006(2)
O7 0.079(5) 0.025(3) 0.032(4) -0.002(3) -0.006(3) 0.023(4)
O5 0.053(4) 0.054(4) 0.039(4) 0.035(4) 0.018(3) 0.023(4)
C3 0.010(3) 0.014(3) 0.028(4) 0.007(3) 0.003(3) 0.003(3)
C4 0.014(3) 0.018(4) 0.029(4) 0.006(3) 0.004(3) 0.009(3)
O6 0.032(4) 0.086(6) 0.028(3) 0.007(3) -0.004(3) 0.039(4)
C17 0.022(4) 0.016(4) 0.050(5) 0.008(4) 0.010(4) 0.009(3)
C14 0.013(3) 0.018(4) 0.015(3) 0.008(3) 0.000(3) 0.004(3)
C1 0.014(3) 0.013(3) 0.020(3) 0.005(3) -0.001(3) 0.006(3)
C2 0.012(3) 0.011(3) 0.020(3) 0.005(3) 0.000(3) 0.004(3)
C9 0.044(5) 0.026(4) 0.021(4) 0.011(4) 0.004(3) 0.021(4)
C8 0.036(5) 0.024(4) 0.028(4) 0.011(4) 0.011(4) 0.014(4)
C5 0.015(3) 0.014(3) 0.020(3) 0.006(3) 0.003(3) 0.007(3)
C6 0.011(3) 0.015(3) 0.017(3) 0.007(3) -0.001(3) 0.006(3)
C7 0.010(3) 0.016(3) 0.012(3) 0.004(3) 0.000(2) 0.006(3)
C10 0.032(5) 0.041(5) 0.014(4) 0.006(3) 0.001(3) 0.021(4)
C11 0.033(4) 0.024(4) 0.020(4) 0.004(3) 0.000(3) 0.016(4)
C12 0.043(5) 0.025(4) 0.018(4) 0.009(3) 0.012(3) 0.022(4)
C13 0.014(3) 0.020(4) 0.043(5) 0.012(4) 0.004(3) 0.006(3)
C16 0.029(4) 0.028(4) 0.016(4) 0.007(3) 0.002(3) 0.010(4)
C15 0.039(5) 0.044(5) 0.020(4) 0.014(4) 0.012(4) 0.022(4)
 
_geom_special_details
;
 All esds (except the esd in the dihedral angle between two l.s. planes)
 are estimated using the full covariance matrix.  The cell esds are taken
 into account individually in the estimation of esds in distances, angles
 and torsion angles; correlations between esds in cell parameters are only
 used when they are defined by crystal symmetry.  An approximate (isotropic)
 treatment of cell esds is used for estimating esds involving l.s. planes.
;
 
loop_
 _geom_bond_atom_site_label_1
 _geom_bond_atom_site_label_2
 _geom_bond_distance
 _geom_bond_site_symmetry_2
 _geom_bond_publ_flag
Sn2 C17 2.122(8) . ?
Sn2 C15 2.131(8) . ?
Sn2 C16 2.130(8) . ?
Sn2 O4 2.176(5) . ?
Sn2 O2 2.399(5) 1_655 ?
Sn1 C11 2.111(8) . ?
Sn1 C12 2.122(7) . ?
Sn1 C13 2.138(8) . ?
Sn1 O1 2.169(5) . ?
Sn1 O3 2.404(5) . ?
Cr1 C9 1.860(8) . ?
Cr1 C10 1.872(8) . ?
Cr1 C8 1.866(8) . ?
Cr1 C7 2.175(7) . ?
Cr1 C6 2.192(7) . ?
Cr1 C5 2.207(7) . ?
Cr1 C3 2.206(7) . ?
Cr1 C2 2.208(7) . ?
Cr1 C4 2.241(7) . ?
O4 C14 1.278(9) . ?
O3 C14 1.234(9) . ?
O1 C1 1.273(9) . ?
O2 C1 1.224(9) . ?
O2 Sn2 2.399(5) 1_455 ?
O7 C9 1.151(10) . ?
O5 C8 1.138(10) . ?
C3 C4 1.402(10) . ?
C3 C2 1.416(10) . ?
C3 H3 0.9800 . ?
C4 C5 1.417(10) . ?
C4 H4 0.9800 . ?
O6 C10 1.153(10) . ?
C17 H17A 0.9600 . ?
C17 H17B 0.9600 . ?
C17 H17C 0.9600 . ?
C14 C6 1.518(9) 1_545 ?
C1 C2 1.507(9) . ?
C2 C7 1.428(9) . ?
C5 C6 1.412(10) . ?
C5 H5 0.9800 . ?
C6 C7 1.414(9) . ?
C6 C14 1.518(9) 1_565 ?
C7 H7 0.9800 . ?
C11 H11A 0.9600 . ?
C11 H11B 0.9600 . ?
C11 H11C 0.9600 . ?
C12 H12A 0.9600 . ?
C12 H12B 0.9600 . ?
C12 H12C 0.9600 . ?
C13 H13A 0.9600 . ?
C13 H13B 0.9600 . ?
C13 H13C 0.9600 . ?
C16 H16A 0.9600 . ?
C16 H16B 0.9600 . ?
C16 H16C 0.9600 . ?
C15 H15A 0.9600 . ?
C15 H15B 0.9600 . ?
C15 H15C 0.9600 . ?
 
loop_
 _geom_angle_atom_site_label_1
 _geom_angle_atom_site_label_2
 _geom_angle_atom_site_label_3
 _geom_angle
 _geom_angle_site_symmetry_1
 _geom_angle_site_symmetry_3
 _geom_angle_publ_flag
C17 Sn2 C15 118.8(4) . . ?
C17 Sn2 C16 114.9(4) . . ?
C15 Sn2 C16 125.6(3) . . ?
C17 Sn2 O4 90.2(3) . . ?
C15 Sn2 O4 92.9(3) . . ?
C16 Sn2 O4 95.0(3) . . ?
C17 Sn2 O2 87.5(3) . 1_655 ?
C15 Sn2 O2 87.6(3) . 1_655 ?
C16 Sn2 O2 86.5(3) . 1_655 ?
O4 Sn2 O2 177.67(18) . 1_655 ?
C11 Sn1 C12 126.8(3) . . ?
C11 Sn1 C13 118.0(3) . . ?
C12 Sn1 C13 114.3(3) . . ?
C11 Sn1 O1 94.1(3) . . ?
C12 Sn1 O1 94.8(3) . . ?
C13 Sn1 O1 89.6(3) . . ?
C11 Sn1 O3 84.6(2) . . ?
C12 Sn1 O3 86.8(3) . . ?
C13 Sn1 O3 90.1(2) . . ?
O1 Sn1 O3 178.36(19) . . ?
C9 Cr1 C10 89.8(4) . . ?
C9 Cr1 C8 88.2(4) . . ?
C10 Cr1 C8 89.6(4) . . ?
C9 Cr1 C7 134.5(3) . . ?
C10 Cr1 C7 82.9(3) . . ?
C8 Cr1 C7 136.3(3) . . ?
C9 Cr1 C6 100.4(3) . . ?
C10 Cr1 C6 98.5(3) . . ?
C8 Cr1 C6 168.2(3) . . ?
C7 Cr1 C6 37.8(3) . . ?
C9 Cr1 C5 86.7(3) . . ?
C10 Cr1 C5 133.5(3) . . ?
C8 Cr1 C5 136.5(3) . . ?
C7 Cr1 C5 67.7(3) . . ?
C6 Cr1 C5 37.4(2) . . ?
C9 Cr1 C3 136.6(3) . . ?
C10 Cr1 C3 133.4(3) . . ?
C8 Cr1 C3 88.3(3) . . ?
C7 Cr1 C3 67.6(3) . . ?
C6 Cr1 C3 79.8(3) . . ?
C5 Cr1 C3 67.1(3) . . ?
C9 Cr1 C2 167.0(3) . . ?
C10 Cr1 C2 98.3(3) . . ?
C8 Cr1 C2 102.0(3) . . ?
C7 Cr1 C2 38.0(3) . . ?
C6 Cr1 C2 68.5(3) . . ?
C5 Cr1 C2 80.3(3) . . ?
C3 Cr1 C2 37.4(3) . . ?
C9 Cr1 C4 102.9(3) . . ?
C10 Cr1 C4 162.1(3) . . ?
C8 Cr1 C4 103.2(3) . . ?
C7 Cr1 C4 79.2(3) . . ?
C6 Cr1 C4 67.1(3) . . ?
C5 Cr1 C4 37.1(3) . . ?
C3 Cr1 C4 36.7(3) . . ?
C2 Cr1 C4 67.0(3) . . ?
C14 O4 Sn2 121.1(4) . . ?
C14 O3 Sn1 149.4(5) . . ?
C1 O1 Sn1 122.2(4) . . ?
C1 O2 Sn2 153.9(5) . 1_455 ?
C4 C3 C2 121.4(7) . . ?
C4 C3 Cr1 73.0(4) . . ?
C2 C3 Cr1 71.4(4) . . ?
C4 C3 H3 118.8 . . ?
C2 C3 H3 118.8 . . ?
Cr1 C3 H3 118.8 . . ?
C3 C4 C5 120.0(6) . . ?
C3 C4 Cr1 70.3(4) . . ?
C5 C4 Cr1 70.1(4) . . ?
C3 C4 H4 119.1 . . ?
C5 C4 H4 119.1 . . ?
Cr1 C4 H4 119.1 . . ?
Sn2 C17 H17A 109.5 . . ?
Sn2 C17 H17B 109.5 . . ?
H17A C17 H17B 109.5 . . ?
Sn2 C17 H17C 109.5 . . ?
H17A C17 H17C 109.5 . . ?
H17B C17 H17C 109.5 . . ?
O3 C14 O4 125.3(6) . . ?
O3 C14 C6 120.5(6) . 1_545 ?
O4 C14 C6 114.1(6) . 1_545 ?
O2 C1 O1 124.8(6) . . ?
O2 C1 C2 120.5(6) . . ?
O1 C1 C2 114.7(6) . . ?
C3 C2 C7 117.9(6) . . ?
C3 C2 C1 123.3(6) . . ?
C7 C2 C1 118.2(6) . . ?
C3 C2 Cr1 71.2(4) . . ?
C7 C2 Cr1 69.7(4) . . ?
C1 C2 Cr1 122.9(5) . . ?
O7 C9 Cr1 179.8(9) . . ?
O5 C8 Cr1 177.7(8) . . ?
C6 C5 C4 120.0(6) . . ?
C6 C5 Cr1 70.7(4) . . ?
C4 C5 Cr1 72.7(4) . . ?
C6 C5 H5 119.6 . . ?
C4 C5 H5 119.6 . . ?
Cr1 C5 H5 119.6 . . ?
C5 C6 C7 119.5(6) . . ?
C5 C6 C14 121.9(6) . 1_565 ?
C7 C6 C14 118.1(6) . 1_565 ?
C5 C6 Cr1 71.8(4) . . ?
C7 C6 Cr1 70.4(4) . . ?
C14 C6 Cr1 122.0(4) 1_565 . ?
C6 C7 C2 121.2(6) . . ?
C6 C7 Cr1 71.8(4) . . ?
C2 C7 Cr1 72.3(4) . . ?
C6 C7 H7 118.9 . . ?
C2 C7 H7 118.9 . . ?
Cr1 C7 H7 118.9 . . ?
O6 C10 Cr1 175.5(7) . . ?
Sn1 C11 H11A 109.5 . . ?
Sn1 C11 H11B 109.5 . . ?
H11A C11 H11B 109.5 . . ?
Sn1 C11 H11C 109.5 . . ?
H11A C11 H11C 109.5 . . ?
H11B C11 H11C 109.5 . . ?
Sn1 C12 H12A 109.5 . . ?
Sn1 C12 H12B 109.5 . . ?
H12A C12 H12B 109.5 . . ?
Sn1 C12 H12C 109.5 . . ?
H12A C12 H12C 109.5 . . ?
H12B C12 H12C 109.5 . . ?
Sn1 C13 H13A 109.5 . . ?
Sn1 C13 H13B 109.5 . . ?
H13A C13 H13B 109.5 . . ?
Sn1 C13 H13C 109.5 . . ?
H13A C13 H13C 109.5 . . ?
H13B C13 H13C 109.5 . . ?
Sn2 C16 H16A 109.5 . . ?
Sn2 C16 H16B 109.5 . . ?
H16A C16 H16B 109.5 . . ?
Sn2 C16 H16C 109.5 . . ?
H16A C16 H16C 109.5 . . ?
H16B C16 H16C 109.5 . . ?
Sn2 C15 H15A 109.5 . . ?
Sn2 C15 H15B 109.5 . . ?
H15A C15 H15B 109.5 . . ?
Sn2 C15 H15C 109.5 . . ?
H15A C15 H15C 109.5 . . ?
H15B C15 H15C 109.5 . . ?
 
loop_
 _geom_torsion_atom_site_label_1
 _geom_torsion_atom_site_label_2
 _geom_torsion_atom_site_label_3
 _geom_torsion_atom_site_label_4
 _geom_torsion
 _geom_torsion_site_symmetry_1
 _geom_torsion_site_symmetry_2
 _geom_torsion_site_symmetry_3
 _geom_torsion_site_symmetry_4
 _geom_torsion_publ_flag
C17 Sn2 O4 C14 163.2(6) . . . . ?
C15 Sn2 O4 C14 -78.0(6) . . . . ?
C16 Sn2 O4 C14 48.2(6) . . . . ?
O2 Sn2 O4 C14 -180(100) 1_655 . . . ?
C11 Sn1 O3 C14 -15.4(10) . . . . ?
C12 Sn1 O3 C14 112.1(10) . . . . ?
C13 Sn1 O3 C14 -133.6(10) . . . . ?
O1 Sn1 O3 C14 -54(7) . . . . ?
C11 Sn1 O1 C1 84.2(6) . . . . ?
C12 Sn1 O1 C1 -43.3(6) . . . . ?
C13 Sn1 O1 C1 -157.7(6) . . . . ?
O3 Sn1 O1 C1 122(6) . . . . ?
C9 Cr1 C3 C4 29.4(7) . . . . ?
C10 Cr1 C3 C4 -157.2(5) . . . . ?
C8 Cr1 C3 C4 114.9(5) . . . . ?
C7 Cr1 C3 C4 -102.4(5) . . . . ?
C6 Cr1 C3 C4 -65.0(5) . . . . ?
C5 Cr1 C3 C4 -28.2(4) . . . . ?
C2 Cr1 C3 C4 -132.7(7) . . . . ?
C9 Cr1 C3 C2 162.1(5) . . . . ?
C10 Cr1 C3 C2 -24.5(6) . . . . ?
C8 Cr1 C3 C2 -112.3(5) . . . . ?
C7 Cr1 C3 C2 30.3(4) . . . . ?
C6 Cr1 C3 C2 67.7(4) . . . . ?
C5 Cr1 C3 C2 104.6(5) . . . . ?
C4 Cr1 C3 C2 132.7(7) . . . . ?
C2 C3 C4 C5 -3.2(11) . . . . ?
Cr1 C3 C4 C5 51.5(6) . . . . ?
C2 C3 C4 Cr1 -54.7(6) . . . . ?
C9 Cr1 C4 C3 -159.8(5) . . . . ?
C10 Cr1 C4 C3 66.0(12) . . . . ?
C8 Cr1 C4 C3 -68.6(5) . . . . ?
C7 Cr1 C4 C3 66.8(5) . . . . ?
C6 Cr1 C4 C3 104.3(5) . . . . ?
C5 Cr1 C4 C3 133.9(7) . . . . ?
C2 Cr1 C4 C3 29.0(4) . . . . ?
C9 Cr1 C4 C5 66.3(5) . . . . ?
C10 Cr1 C4 C5 -67.9(12) . . . . ?
C8 Cr1 C4 C5 157.5(5) . . . . ?
C7 Cr1 C4 C5 -67.1(4) . . . . ?
C6 Cr1 C4 C5 -29.6(4) . . . . ?
C3 Cr1 C4 C5 -133.9(7) . . . . ?
C2 Cr1 C4 C5 -104.9(5) . . . . ?
Sn1 O3 C14 O4 122.0(9) . . . . ?
Sn1 O3 C14 C6 -60.7(12) . . . 1_545 ?
Sn2 O4 C14 O3 16.3(10) . . . . ?
Sn2 O4 C14 C6 -161.2(4) . . . 1_545 ?
Sn2 O2 C1 O1 -137.1(9) 1_455 . . . ?
Sn2 O2 C1 C2 45.6(15) 1_455 . . . ?
Sn1 O1 C1 O2 -19.7(10) . . . . ?
Sn1 O1 C1 C2 157.8(4) . . . . ?
C4 C3 C2 C7 1.8(10) . . . . ?
Cr1 C3 C2 C7 -53.5(6) . . . . ?
C4 C3 C2 C1 173.0(7) . . . . ?
Cr1 C3 C2 C1 117.6(6) . . . . ?
C4 C3 C2 Cr1 55.4(7) . . . . ?
O2 C1 C2 C3 12.2(11) . . . . ?
O1 C1 C2 C3 -165.4(7) . . . . ?
O2 C1 C2 C7 -176.7(7) . . . . ?
O1 C1 C2 C7 5.7(9) . . . . ?
O2 C1 C2 Cr1 100.3(7) . . . . ?
O1 C1 C2 Cr1 -77.3(7) . . . . ?
C9 Cr1 C2 C3 -69.6(16) . . . . ?
C10 Cr1 C2 C3 162.3(5) . . . . ?
C8 Cr1 C2 C3 70.9(5) . . . . ?
C7 Cr1 C2 C3 -130.7(6) . . . . ?
C6 Cr1 C2 C3 -101.8(5) . . . . ?
C5 Cr1 C2 C3 -64.8(4) . . . . ?
C4 Cr1 C2 C3 -28.5(4) . . . . ?
C9 Cr1 C2 C7 61.1(16) . . . . ?
C10 Cr1 C2 C7 -67.0(5) . . . . ?
C8 Cr1 C2 C7 -158.3(4) . . . . ?
C6 Cr1 C2 C7 29.0(4) . . . . ?
C5 Cr1 C2 C7 66.0(4) . . . . ?
C3 Cr1 C2 C7 130.7(6) . . . . ?
C4 Cr1 C2 C7 102.2(4) . . . . ?
C9 Cr1 C2 C1 172.2(13) . . . . ?
C10 Cr1 C2 C1 44.2(6) . . . . ?
C8 Cr1 C2 C1 -47.2(6) . . . . ?
C7 Cr1 C2 C1 111.1(7) . . . . ?
C6 Cr1 C2 C1 140.1(6) . . . . ?
C5 Cr1 C2 C1 177.1(6) . . . . ?
C3 Cr1 C2 C1 -118.1(7) . . . . ?
C4 Cr1 C2 C1 -146.6(6) . . . . ?
C10 Cr1 C9 O7 24(100) . . . . ?
C8 Cr1 C9 O7 114(100) . . . . ?
C7 Cr1 C9 O7 -55(100) . . . . ?
C6 Cr1 C9 O7 -74(100) . . . . ?
C5 Cr1 C9 O7 -109(100) . . . . ?
C3 Cr1 C9 O7 -160(100) . . . . ?
C2 Cr1 C9 O7 -105(100) . . . . ?
C4 Cr1 C9 O7 -143(100) . . . . ?
C9 Cr1 C8 O5 -13(21) . . . . ?
C10 Cr1 C8 O5 77(21) . . . . ?
C7 Cr1 C8 O5 156(20) . . . . ?
C6 Cr1 C8 O5 -149(20) . . . . ?
C5 Cr1 C8 O5 -96(21) . . . . ?
C3 Cr1 C8 O5 -149(21) . . . . ?
C2 Cr1 C8 O5 176(100) . . . . ?
C4 Cr1 C8 O5 -115(21) . . . . ?
C3 C4 C5 C6 3.1(11) . . . . ?
Cr1 C4 C5 C6 54.6(6) . . . . ?
C3 C4 C5 Cr1 -51.5(6) . . . . ?
C9 Cr1 C5 C6 111.9(5) . . . . ?
C10 Cr1 C5 C6 25.3(6) . . . . ?
C8 Cr1 C5 C6 -164.3(5) . . . . ?
C7 Cr1 C5 C6 -29.6(4) . . . . ?
C3 Cr1 C5 C6 -103.7(5) . . . . ?
C2 Cr1 C5 C6 -67.0(4) . . . . ?
C4 Cr1 C5 C6 -131.5(6) . . . . ?
C9 Cr1 C5 C4 -116.6(5) . . . . ?
C10 Cr1 C5 C4 156.8(5) . . . . ?
C8 Cr1 C5 C4 -32.7(6) . . . . ?
C7 Cr1 C5 C4 101.9(5) . . . . ?
C6 Cr1 C5 C4 131.5(6) . . . . ?
C3 Cr1 C5 C4 27.9(4) . . . . ?
C2 Cr1 C5 C4 64.5(4) . . . . ?
C4 C5 C6 C7 -1.8(10) . . . . ?
Cr1 C5 C6 C7 53.8(6) . . . . ?
C4 C5 C6 C14 -172.6(6) . . . 1_565 ?
Cr1 C5 C6 C14 -117.0(6) . . . 1_565 ?
C4 C5 C6 Cr1 -55.6(6) . . . . ?
C9 Cr1 C6 C5 -70.4(5) . . . . ?
C10 Cr1 C6 C5 -161.7(5) . . . . ?
C8 Cr1 C6 C5 65.3(17) . . . . ?
C7 Cr1 C6 C5 131.8(6) . . . . ?
C3 Cr1 C6 C5 65.5(4) . . . . ?
C2 Cr1 C6 C5 102.6(4) . . . . ?
C4 Cr1 C6 C5 29.4(4) . . . . ?
C9 Cr1 C6 C7 157.9(4) . . . . ?
C10 Cr1 C6 C7 66.5(5) . . . . ?
C8 Cr1 C6 C7 -66.4(16) . . . . ?
C5 Cr1 C6 C7 -131.8(6) . . . . ?
C3 Cr1 C6 C7 -66.3(4) . . . . ?
C2 Cr1 C6 C7 -29.1(4) . . . . ?
C4 Cr1 C6 C7 -102.4(4) . . . . ?
C9 Cr1 C6 C14 46.4(6) . . . 1_565 ?
C10 Cr1 C6 C14 -45.0(6) . . . 1_565 ?
C8 Cr1 C6 C14 -177.9(14) . . . 1_565 ?
C7 Cr1 C6 C14 -111.5(7) . . . 1_565 ?
C5 Cr1 C6 C14 116.7(7) . . . 1_565 ?
C3 Cr1 C6 C14 -177.8(6) . . . 1_565 ?
C2 Cr1 C6 C14 -140.6(6) . . . 1_565 ?
C4 Cr1 C6 C14 146.1(6) . . . 1_565 ?
C5 C6 C7 C2 0.4(10) . . . . ?
C14 C6 C7 C2 171.6(6) 1_565 . . . ?
Cr1 C6 C7 C2 55.0(6) . . . . ?
C5 C6 C7 Cr1 -54.5(6) . . . . ?
C14 C6 C7 Cr1 116.7(6) 1_565 . . . ?
C3 C2 C7 C6 -0.5(10) . . . . ?
C1 C2 C7 C6 -172.1(6) . . . . ?
Cr1 C2 C7 C6 -54.7(6) . . . . ?
C3 C2 C7 Cr1 54.3(6) . . . . ?
C1 C2 C7 Cr1 -117.4(6) . . . . ?
C9 Cr1 C7 C6 -31.3(6) . . . . ?
C10 Cr1 C7 C6 -113.9(5) . . . . ?
C8 Cr1 C7 C6 164.2(5) . . . . ?
C5 Cr1 C7 C6 29.4(4) . . . . ?
C3 Cr1 C7 C6 102.8(4) . . . . ?
C2 Cr1 C7 C6 132.7(6) . . . . ?
C4 Cr1 C7 C6 66.3(4) . . . . ?
C9 Cr1 C7 C2 -163.9(5) . . . . ?
C10 Cr1 C7 C2 113.4(5) . . . . ?
C8 Cr1 C7 C2 31.5(6) . . . . ?
C6 Cr1 C7 C2 -132.7(6) . . . . ?
C5 Cr1 C7 C2 -103.3(4) . . . . ?
C3 Cr1 C7 C2 -29.9(4) . . . . ?
C4 Cr1 C7 C2 -66.4(4) . . . . ?
C9 Cr1 C10 O6 -126(11) . . . . ?
C8 Cr1 C10 O6 146(11) . . . . ?
C7 Cr1 C10 O6 9(11) . . . . ?
C6 Cr1 C10 O6 -26(11) . . . . ?
C5 Cr1 C10 O6 -41(11) . . . . ?
C3 Cr1 C10 O6 58(11) . . . . ?
C2 Cr1 C10 O6 43(11) . . . . ?
C4 Cr1 C10 O6 9(12) . . . . ?
 
_diffrn_measured_fraction_theta_max    0.976
_diffrn_reflns_theta_full              26.00
_diffrn_measured_fraction_theta_full   0.976
_refine_diff_density_max    4.265
_refine_diff_density_min   -1.515
_refine_diff_density_rms    0.185
#============end
data_complex5
 
_audit_creation_method            SHELXL-97
_chemical_name_systematic
;
 ?
;
_chemical_name_common             ?
_chemical_melting_point           ?
_chemical_formula_moiety          'C17 H22 Cr O7 Sn2'
_chemical_formula_sum
 'C17 H22 Cr O7 Sn2'
_chemical_formula_weight          627.73
 
loop_
 _atom_type_symbol
 _atom_type_description
 _atom_type_scat_dispersion_real
 _atom_type_scat_dispersion_imag
 _atom_type_scat_source
 'C'  'C'   0.0033   0.0016
 'International Tables Vol C Tables 4.2.6.8 and 6.1.1.4'
 'H'  'H'   0.0000   0.0000
 'International Tables Vol C Tables 4.2.6.8 and 6.1.1.4'
 'Cr'  'Cr'   0.3209   0.6236
 'International Tables Vol C Tables 4.2.6.8 and 6.1.1.4'
 'O'  'O'   0.0106   0.0060
 'International Tables Vol C Tables 4.2.6.8 and 6.1.1.4'
 'Sn'  'Sn'  -0.6537   1.4246
 'International Tables Vol C Tables 4.2.6.8 and 6.1.1.4'
 
_symmetry_cell_setting            'monoclinic'
_symmetry_space_group_name_H-M    '     I 2/a'
_symmetry_space_group_name_Hall '-I 2ya'
loop_
 _symmetry_equiv_pos_as_xyz
 'x, y, z'
 '-x+1/2, y, -z'
 'x+1/2, y+1/2, z+1/2'
 '-x+1, y+1/2, -z+1/2'
 '-x, -y, -z'
 'x-1/2, -y, z'
 '-x+1/2, -y+1/2, -z+1/2'
 'x, -y+1/2, z+1/2'
 
_cell_length_a                    18.317(7)
_cell_length_b                    10.150(4)
_cell_length_c                    25.277(13)
_cell_angle_alpha                 90.00
_cell_angle_beta                  110.942(11)
_cell_angle_gamma                 90.00
_cell_volume                      4389(3)
_cell_formula_units_Z             8
_cell_measurement_temperature     100(2)
_cell_measurement_reflns_used    3355
_cell_measurement_theta_min        2.33
_cell_measurement_theta_max       28.22
_exptl_crystal_description        'block'
_exptl_crystal_colour             'yellow'
_exptl_crystal_size_max           0.10
_exptl_crystal_size_mid           0.10
_exptl_crystal_size_min           0.10
_exptl_crystal_density_meas       ?
_exptl_crystal_density_diffrn     1.900
_exptl_crystal_density_method     'not measured'
_exptl_crystal_F_000              2432
_exptl_absorpt_coefficient_mu     2.777
_exptl_absorpt_correction_type    'empirical'
_exptl_absorpt_correction_T_min   0.7687
_exptl_absorpt_correction_T_max   0.7687
_exptl_absorpt_process_details    'sadabs'
 
_exptl_special_details
;
 ?
;
 
_diffrn_ambient_temperature       100(2)
_diffrn_radiation_wavelength      0.71073
_diffrn_radiation_type            MoK\a
_diffrn_radiation_source          'fine-focus sealed tube'
_diffrn_radiation_monochromator   graphite
_diffrn_measurement_device_type  'CCD area detector'
_diffrn_measurement_method       'phi and omega scans'
_diffrn_detector_area_resol_mean  ?
_diffrn_standards_number          ?
_diffrn_standards_interval_count  ?
_diffrn_standards_interval_time   ?
_diffrn_standards_decay_%         ?
_diffrn_reflns_number             8058
_diffrn_reflns_av_R_equivalents   0.0793
_diffrn_reflns_av_sigmaI/netI     0.0944
_diffrn_reflns_limit_h_min        -21
_diffrn_reflns_limit_h_max        20
_diffrn_reflns_limit_k_min        -12
_diffrn_reflns_limit_k_max        12
_diffrn_reflns_limit_l_min        -30
_diffrn_reflns_limit_l_max        21
_diffrn_reflns_theta_min          2.18
_diffrn_reflns_theta_max          25.49
_reflns_number_total              3891
_reflns_number_gt                 2603
_reflns_threshold_expression      >2sigma(I)
 
_computing_data_collection      'Bruker SMART'
_computing_cell_refinement      'Bruker SMART'
_computing_data_reduction       'Bruker SAINT'
_computing_structure_solution   'Bruker SHELXTL'
_computing_structure_refinement 'Bruker SHELXTL'
_computing_molecular_graphics   'Bruker SHELXTL'
_computing_publication_material 'Bruker SHELXTL'
 
 
_refine_special_details
;
 Refinement of F^2^ against ALL reflections.  The weighted R-factor wR and
 goodness of fit S are based on F^2^, conventional R-factors R are based
 on F, with F set to zero for negative F^2^. The threshold expression of
 F^2^ > 2sigma(F^2^) is used only for calculating R-factors(gt) etc. and is
 not relevant to the choice of reflections for refinement.  R-factors based
 on F^2^ are statistically about twice as large as those based on F, and R-
 factors based on ALL data will be even larger.
;
 
_refine_ls_structure_factor_coef  Fsqd
_refine_ls_matrix_type            full
_refine_ls_weighting_scheme       calc
_refine_ls_weighting_details
 'calc w=1/[\s^2^(Fo^2^)+(0.1016P)^2^+0.0000P] where P=(Fo^2^+2Fc^2^)/3'
_atom_sites_solution_primary      direct
_atom_sites_solution_secondary    difmap
_atom_sites_solution_hydrogens    geom
_refine_ls_hydrogen_treatment     mixed
_refine_ls_extinction_method      none
_refine_ls_extinction_coef        ?
_refine_ls_number_reflns          3891
_refine_ls_number_parameters      226
_refine_ls_number_restraints      0
_refine_ls_R_factor_all           0.1034
_refine_ls_R_factor_gt            0.0673
_refine_ls_wR_factor_ref          0.1853
_refine_ls_wR_factor_gt           0.1640
_refine_ls_goodness_of_fit_ref    1.047
_refine_ls_restrained_S_all       1.047
_refine_ls_shift/su_max           0.040
_refine_ls_shift/su_mean          0.001
 
loop_
 _atom_site_label
 _atom_site_type_symbol
 _atom_site_fract_x
 _atom_site_fract_y
 _atom_site_fract_z
 _atom_site_U_iso_or_equiv
 _atom_site_adp_type
 _atom_site_occupancy
 _atom_site_symmetry_multiplicity
 _atom_site_calc_flag
 _atom_site_refinement_flags
 _atom_site_disorder_assembly
 _atom_site_disorder_group
Sn1 Sn 0.64935(4) 0.32656(6) 0.61184(3) 0.0169(2) Uani 1 1 d . . .
Sn2 Sn 0.72411(4) 0.82475(7) 0.60306(3) 0.0171(2) Uani 1 1 d . . .
Cr3 Cr 0.48055(11) 0.76831(16) 0.67786(7) 0.0184(4) Uani 1 1 d . . .
O2 O 0.5592(4) 0.4659(7) 0.6068(3) 0.0237(18) Uani 1 1 d . . .
O4 O 0.8116(4) 0.9669(7) 0.6039(3) 0.0230(13) Uani 1 1 d . . .
O5 O 0.7476(5) 1.1453(7) 0.6172(3) 0.0230(13) Uani 1 1 d . . .
O1 O 0.6276(5) 0.6433(7) 0.6000(3) 0.0238(18) Uani 1 1 d . . .
C1 C 0.5714(7) 0.1658(10) 0.6091(5) 0.028(3) Uani 1 1 d . . .
H1A H 0.5222 0.2001 0.6084 0.043 Uiso 1 1 calc R . .
H1B H 0.5939 0.1115 0.6420 0.043 Uiso 1 1 calc R . .
H1C H 0.5633 0.1142 0.5757 0.043 Uiso 1 1 calc R . .
C11 C 0.8021(8) 0.6698(11) 0.6013(6) 0.036(3) Uani 1 1 d . . .
H11A H 0.8531 0.7057 0.6080 0.054 Uiso 1 1 calc R . .
H11B H 0.7832 0.6276 0.5649 0.054 Uiso 1 1 calc R . .
H11C H 0.8051 0.6065 0.6302 0.054 Uiso 1 1 calc R . .
C4 C 0.5005(6) 0.6725(9) 0.6057(4) 0.016(2) Uani 1 1 d . . .
C7 C 0.3730(7) 0.8272(9) 0.6084(4) 0.0173(11) Uani 1 1 d . . .
C8 C 0.3730(7) 0.6855(9) 0.6150(4) 0.0173(11) Uani 1 1 d . . .
H8 H 0.3340 0.6449 0.6282 0.021 Uiso 1 1 calc R . .
C5 C 0.4990(7) 0.8125(9) 0.5978(4) 0.017(2) Uani 1 1 d . . .
H5 H 0.5470 0.8577 0.5993 0.020 Uiso 1 1 calc R . .
O6 O 0.5846(5) 0.9858(8) 0.7451(3) 0.035(2) Uani 1 1 d . . .
C9 C 0.4357(6) 0.6110(10) 0.6141(4) 0.0173(11) Uani 1 1 d . . .
H9 H 0.4400 0.5189 0.6265 0.021 Uiso 1 1 calc R . .
C13 C 0.8040(7) 1.0925(10) 0.6110(4) 0.021(2) Uani 1 1 d . . .
C3 C 0.5691(7) 0.5918(10) 0.6037(4) 0.020(2) Uani 1 1 d . . .
O7 O 0.4041(6) 0.7898(8) 0.7647(3) 0.039(2) Uani 1 1 d . . .
O8 O 0.5954(5) 0.5848(8) 0.7594(3) 0.040(2) Uani 1 1 d . . .
C12 C 0.7300(6) 0.3935(11) 0.6895(4) 0.024(3) Uani 1 1 d . . .
H12A H 0.7572 0.4691 0.6831 0.036 Uiso 1 1 calc R . .
H12B H 0.7669 0.3248 0.7067 0.036 Uiso 1 1 calc R . .
H12C H 0.7028 0.4171 0.7143 0.036 Uiso 1 1 calc R . .
C6 C 0.4362(6) 0.8867(10) 0.6002(4) 0.0173(11) Uani 1 1 d . . .
H6 H 0.4412 0.9828 0.6030 0.021 Uiso 1 1 calc R . .
C10 C 0.6420(7) 0.8842(11) 0.5236(4) 0.025(3) Uani 1 1 d . . .
H10A H 0.5990 0.8234 0.5121 0.038 Uiso 1 1 calc R . .
H10B H 0.6667 0.8851 0.4959 0.038 Uiso 1 1 calc R . .
H10C H 0.6231 0.9709 0.5270 0.038 Uiso 1 1 calc R . .
C2 C 0.6593(8) 0.3695(11) 0.5330(5) 0.029(3) Uani 1 1 d . . .
H2A H 0.7066 0.4180 0.5390 0.044 Uiso 1 1 calc R . .
H2B H 0.6153 0.4213 0.5105 0.044 Uiso 1 1 calc R . .
H2C H 0.6606 0.2888 0.5135 0.044 Uiso 1 1 calc R . .
C15 C 0.5457(7) 0.9027(11) 0.7183(5) 0.025(3) Uani 1 1 d . . .
C14 C 0.5501(7) 0.6533(11) 0.7277(5) 0.025(3) Uani 1 1 d . . .
C16 C 0.4306(8) 0.7804(11) 0.7313(5) 0.028(3) Uani 1 1 d . . .
C17 C 0.7151(7) 0.8690(11) 0.6821(4) 0.025(3) Uani 1 1 d . . .
H17A H 0.7085 0.9622 0.6849 0.037 Uiso 1 1 calc R . .
H17B H 0.7618 0.8411 0.7120 0.037 Uiso 1 1 calc R . .
H17C H 0.6709 0.8237 0.6854 0.037 Uiso 1 1 calc R . .
 
loop_
 _atom_site_aniso_label
 _atom_site_aniso_U_11
 _atom_site_aniso_U_22
 _atom_site_aniso_U_33
 _atom_site_aniso_U_23
 _atom_site_aniso_U_13
 _atom_site_aniso_U_12
Sn1 0.0138(5) 0.0067(4) 0.0311(5) -0.0016(3) 0.0089(3) -0.0004(3)
Sn2 0.0146(5) 0.0065(4) 0.0320(5) 0.0007(3) 0.0103(3) -0.0004(3)
Cr3 0.0144(10) 0.0114(8) 0.0296(9) -0.0001(7) 0.0082(8) -0.0003(7)
O2 0.018(5) 0.007(4) 0.050(5) 0.005(3) 0.016(4) 0.002(3)
O4 0.017(3) 0.007(3) 0.047(3) 0.001(2) 0.014(3) 0.001(2)
O5 0.017(3) 0.007(3) 0.047(3) 0.001(2) 0.014(3) 0.001(2)
O1 0.014(5) 0.013(4) 0.047(5) 0.002(3) 0.014(4) 0.003(3)
C1 0.027(8) 0.016(6) 0.043(7) -0.003(5) 0.014(6) -0.008(5)
C11 0.021(8) 0.022(7) 0.070(9) 0.007(6) 0.024(7) 0.005(6)
C4 0.012(6) 0.006(5) 0.029(6) 0.003(4) 0.006(5) 0.006(4)
C7 0.015(3) 0.009(3) 0.028(3) 0.002(2) 0.007(2) 0.000(2)
C8 0.015(3) 0.009(3) 0.028(3) 0.002(2) 0.007(2) 0.000(2)
C5 0.018(7) 0.007(5) 0.031(6) -0.005(4) 0.014(5) -0.004(4)
O6 0.027(5) 0.028(5) 0.052(5) -0.024(4) 0.015(4) -0.007(4)
C9 0.015(3) 0.009(3) 0.028(3) 0.002(2) 0.007(2) 0.000(2)
C13 0.024(7) 0.015(6) 0.020(6) 0.000(4) 0.003(5) 0.006(5)
C3 0.021(7) 0.019(6) 0.019(5) -0.003(4) 0.007(5) -0.002(5)
O7 0.052(7) 0.036(5) 0.038(5) 0.007(4) 0.026(5) 0.006(5)
O8 0.031(6) 0.031(5) 0.044(5) 0.013(4) -0.001(5) 0.005(4)
C12 0.010(7) 0.028(7) 0.036(6) -0.005(5) 0.010(5) 0.008(5)
C6 0.015(3) 0.009(3) 0.028(3) 0.002(2) 0.007(2) 0.000(2)
C10 0.014(7) 0.030(7) 0.028(6) 0.003(5) 0.004(5) -0.005(5)
C2 0.031(8) 0.027(7) 0.034(7) -0.009(5) 0.017(6) -0.001(5)
C15 0.014(7) 0.021(7) 0.040(7) -0.007(5) 0.010(6) 0.004(5)
C14 0.014(7) 0.028(7) 0.033(6) -0.007(5) 0.008(5) 0.000(5)
C16 0.035(8) 0.014(6) 0.035(7) 0.002(5) 0.014(6) -0.010(5)
C17 0.021(7) 0.027(6) 0.023(6) -0.001(5) 0.004(5) 0.000(5)
 
_geom_special_details
;
 All esds (except the esd in the dihedral angle between two l.s. planes)
 are estimated using the full covariance matrix.  The cell esds are taken
 into account individually in the estimation of esds in distances, angles
 and torsion angles; correlations between esds in cell parameters are only
 used when they are defined by crystal symmetry.  An approximate (isotropic)
 treatment of cell esds is used for estimating esds involving l.s. planes.
;
 
loop_
 _geom_bond_atom_site_label_1
 _geom_bond_atom_site_label_2
 _geom_bond_distance
 _geom_bond_site_symmetry_2
 _geom_bond_publ_flag
Sn1 C12 2.104(11) . ?
Sn1 C2 2.112(10) . ?
Sn1 O2 2.144(7) . ?
Sn1 C1 2.153(11) . ?
Sn1 O5 2.542(7) 1_545 ?
Sn2 C17 2.111(10) . ?
Sn2 C10 2.121(11) . ?
Sn2 C11 2.136(11) . ?
Sn2 O4 2.151(7) . ?
Sn2 O1 2.534(8) . ?
Cr3 C14 1.851(12) . ?
Cr3 C15 1.860(12) . ?
Cr3 C16 1.887(12) . ?
Cr3 C6 2.195(10) . ?
Cr3 C7 2.202(11) . ?
Cr3 C9 2.208(10) . ?
Cr3 C8 2.209(11) . ?
Cr3 C4 2.210(10) . ?
Cr3 C5 2.213(10) . ?
O2 C3 1.297(12) . ?
O4 C13 1.301(12) . ?
O5 C13 1.223(13) . ?
O5 Sn1 2.542(7) 1_565 ?
O1 C3 1.226(13) . ?
C4 C9 1.424(14) . ?
C4 C5 1.433(12) . ?
C4 C3 1.516(14) . ?
C7 C6 1.386(14) . ?
C7 C8 1.448(13) . ?
C7 C13 1.524(15) 6_575 ?
C8 C9 1.382(14) . ?
C5 C6 1.395(14) . ?
O6 C15 1.154(13) . ?
C13 C7 1.524(15) 6_675 ?
O7 C16 1.120(13) . ?
O8 C14 1.157(13) . ?
 
loop_
 _geom_angle_atom_site_label_1
 _geom_angle_atom_site_label_2
 _geom_angle_atom_site_label_3
 _geom_angle
 _geom_angle_site_symmetry_1
 _geom_angle_site_symmetry_3
 _geom_angle_publ_flag
C12 Sn1 C2 123.1(5) . . ?
C12 Sn1 O2 96.4(3) . . ?
C2 Sn1 O2 97.6(4) . . ?
C12 Sn1 C1 120.7(5) . . ?
C2 Sn1 C1 114.0(5) . . ?
O2 Sn1 C1 90.6(4) . . ?
C12 Sn1 O5 86.4(3) . 1_545 ?
C2 Sn1 O5 84.3(4) . 1_545 ?
O2 Sn1 O5 174.9(3) . 1_545 ?
C1 Sn1 O5 84.4(4) . 1_545 ?
C17 Sn2 C10 124.5(5) . . ?
C17 Sn2 C11 117.1(5) . . ?
C10 Sn2 C11 116.3(5) . . ?
C17 Sn2 O4 99.1(4) . . ?
C10 Sn2 O4 95.3(4) . . ?
C11 Sn2 O4 89.6(4) . . ?
C17 Sn2 O1 83.9(4) . . ?
C10 Sn2 O1 85.8(4) . . ?
C11 Sn2 O1 85.9(4) . . ?
O4 Sn2 O1 175.4(2) . . ?
C14 Cr3 C15 86.5(5) . . ?
C14 Cr3 C16 86.9(5) . . ?
C15 Cr3 C16 86.5(5) . . ?
C14 Cr3 C6 154.0(5) . . ?
C15 Cr3 C6 92.8(5) . . ?
C16 Cr3 C6 119.0(5) . . ?
C14 Cr3 C7 156.3(4) . . ?
C15 Cr3 C7 117.0(4) . . ?
C16 Cr3 C7 91.6(5) . . ?
C6 Cr3 C7 36.7(4) . . ?
C14 Cr3 C9 91.5(4) . . ?
C15 Cr3 C9 158.4(4) . . ?
C16 Cr3 C9 114.8(4) . . ?
C6 Cr3 C9 79.7(4) . . ?
C7 Cr3 C9 67.7(4) . . ?
C14 Cr3 C8 118.0(4) . . ?
C15 Cr3 C8 155.1(4) . . ?
C16 Cr3 C8 90.2(5) . . ?
C6 Cr3 C8 67.3(4) . . ?
C7 Cr3 C8 38.3(3) . . ?
C9 Cr3 C8 36.5(4) . . ?
C14 Cr3 C4 90.5(4) . . ?
C15 Cr3 C4 120.9(4) . . ?
C16 Cr3 C4 152.3(4) . . ?
C6 Cr3 C4 67.7(4) . . ?
C7 Cr3 C4 80.0(4) . . ?
C9 Cr3 C4 37.6(4) . . ?
C8 Cr3 C4 66.8(4) . . ?
C14 Cr3 C5 117.2(5) . . ?
C15 Cr3 C5 94.3(4) . . ?
C16 Cr3 C5 155.9(5) . . ?
C6 Cr3 C5 36.9(4) . . ?
C7 Cr3 C5 66.6(4) . . ?
C9 Cr3 C5 67.5(4) . . ?
C8 Cr3 C5 78.9(4) . . ?
C4 Cr3 C5 37.8(3) . . ?
C3 O2 Sn1 122.1(7) . . ?
C13 O4 Sn2 122.8(7) . . ?
C13 O5 Sn1 157.7(7) . 1_565 ?
C3 O1 Sn2 157.9(7) . . ?
C9 C4 C5 118.7(9) . . ?
C9 C4 C3 120.9(8) . . ?
C5 C4 C3 120.4(9) . . ?
C9 C4 Cr3 71.1(6) . . ?
C5 C4 Cr3 71.2(5) . . ?
C3 C4 Cr3 130.4(7) . . ?
C6 C7 C8 118.9(10) . . ?
C6 C7 C13 121.5(9) . 6_575 ?
C8 C7 C13 119.5(9) . 6_575 ?
C6 C7 Cr3 71.4(6) . . ?
C8 C7 Cr3 71.1(6) . . ?
C13 C7 Cr3 129.1(7) 6_575 . ?
C9 C8 C7 120.5(10) . . ?
C9 C8 Cr3 71.7(6) . . ?
C7 C8 Cr3 70.6(6) . . ?
C6 C5 C4 120.3(10) . . ?
C6 C5 Cr3 70.9(6) . . ?
C4 C5 Cr3 71.0(6) . . ?
C8 C9 C4 120.3(9) . . ?
C8 C9 Cr3 71.8(6) . . ?
C4 C9 Cr3 71.3(6) . . ?
O5 C13 O4 125.8(10) . . ?
O5 C13 C7 121.4(9) . 6_675 ?
O4 C13 C7 112.7(9) . 6_675 ?
O1 C3 O2 124.8(10) . . ?
O1 C3 C4 122.0(9) . . ?
O2 C3 C4 113.2(9) . . ?
C7 C6 C5 121.2(9) . . ?
C7 C6 Cr3 71.9(6) . . ?
C5 C6 Cr3 72.2(6) . . ?
O6 C15 Cr3 176.9(10) . . ?
O8 C14 Cr3 177.6(11) . . ?
O7 C16 Cr3 176.8(12) . . ?
 
_diffrn_measured_fraction_theta_max    0.952
_diffrn_reflns_theta_full              25.49
_diffrn_measured_fraction_theta_full   0.952
_refine_diff_density_max    3.857
_refine_diff_density_min   -1.524
_refine_diff_density_rms    0.260
#============end
data_complex6
 
_audit_creation_method            SHELXL-97
_chemical_name_systematic
;
 ?
;
_chemical_name_common             ?
_chemical_melting_point           ?
_chemical_formula_moiety          'C27 H30 Cr N2 O7 Sn2 '
_chemical_formula_sum
 'C27 H30 Cr N2 O7 Sn2'
_chemical_formula_weight          783.91
 
loop_
 _atom_type_symbol
 _atom_type_description
 _atom_type_scat_dispersion_real
 _atom_type_scat_dispersion_imag
 _atom_type_scat_source
 'C'  'C'   0.0033   0.0016
 'International Tables Vol C Tables 4.2.6.8 and 6.1.1.4'
 'N'  'N'   0.0061   0.0033
 'International Tables Vol C Tables 4.2.6.8 and 6.1.1.4'
 'O'  'O'   0.0106   0.0060
 'International Tables Vol C Tables 4.2.6.8 and 6.1.1.4'
 'Sn'  'Sn'  -0.6537   1.4246
 'International Tables Vol C Tables 4.2.6.8 and 6.1.1.4'
 'Cr'  'Cr'   0.3209   0.6236
 'International Tables Vol C Tables 4.2.6.8 and 6.1.1.4'
 'H'  'H'   0.0000   0.0000
 'International Tables Vol C Tables 4.2.6.8 and 6.1.1.4'
 
_symmetry_cell_setting            'monoclinic'
_symmetry_space_group_name_H-M    'P 21/c '
_symmetry_space_group_name_Hall '-P 2ybc'
loop_
 _symmetry_equiv_pos_as_xyz
 'x, y, z'
 '-x, y+1/2, -z+1/2'
 '-x, -y, -z'
 'x, -y-1/2, z-1/2'
 
_cell_length_a                    13.8560(10)
_cell_length_b                    10.3151(8)
_cell_length_c                    20.5239(15)
_cell_angle_alpha                 90.00
_cell_angle_beta                  96.6260(10)
_cell_angle_gamma                 90.00
_cell_volume                      2913.8(4)
_cell_formula_units_Z             4
_cell_measurement_temperature     100(2)
_cell_measurement_reflns_used      9929
_cell_measurement_theta_min        2.21
_cell_measurement_theta_max       28.31
 
_exptl_crystal_description        'block'
_exptl_crystal_colour             'yellow'
_exptl_crystal_size_max           0.14
_exptl_crystal_size_mid           0.13
_exptl_crystal_size_min           0.11
_exptl_crystal_density_meas       ?
_exptl_crystal_density_diffrn     1.787
_exptl_crystal_density_method     'not measured'
_exptl_crystal_F_000              1544
_exptl_absorpt_coefficient_mu     2.114
_exptl_absorpt_correction_type    'empirical'
_exptl_absorpt_correction_T_min   0.751
_exptl_absorpt_correction_T_max   0.793
_exptl_absorpt_process_details    'sadabs'
 
_exptl_special_details
;
 ?
;
 
_diffrn_ambient_temperature       100(2)
_diffrn_radiation_wavelength      0.71073
_diffrn_radiation_type            MoK\a
_diffrn_radiation_source          'fine-focus sealed tube'
_diffrn_radiation_monochromator   graphite
_diffrn_measurement_device_type  'Bruker APEX-II CCD'
_diffrn_measurement_method       '\f and \w scans'
_diffrn_detector_area_resol_mean  ?
_diffrn_standards_number          ?
_diffrn_standards_interval_count  ?
_diffrn_standards_interval_time   ?
_diffrn_standards_decay_%         ?
_diffrn_reflns_number             18670
_diffrn_reflns_av_R_equivalents   0.0259
_diffrn_reflns_av_sigmaI/netI     0.0233
_diffrn_reflns_limit_h_min        -16
_diffrn_reflns_limit_h_max        12
_diffrn_reflns_limit_k_min        -12
_diffrn_reflns_limit_k_max        11
_diffrn_reflns_limit_l_min        -24
_diffrn_reflns_limit_l_max        23
_diffrn_reflns_theta_min          2.21
_diffrn_reflns_theta_max          25.50
_reflns_number_total              5398
_reflns_number_gt                 5010
_reflns_threshold_expression      >2sigma(I)
 
_computing_data_collection       'Bruker APEX2'
_computing_cell_refinement       'Bruker SAINT'
_computing_data_reduction        'Bruker SAINT'
_computing_structure_solution    'SHELXS-97 (Sheldrick 2008)'
_computing_structure_refinement  'SHELXL-2014 (Sheldrick 2014)'
_computing_molecular_graphics    'Bruker SHELXTL'
_computing_publication_material  'Bruker SHELXTL'
 
_refine_special_details
;
 Refinement of F^2^ against ALL reflections.  The weighted R-factor wR and
 goodness of fit S are based on F^2^, conventional R-factors R are based
 on F, with F set to zero for negative F^2^. The threshold expression of
 F^2^ > 2sigma(F^2^) is used only for calculating R-factors(gt) etc. and is
 not relevant to the choice of reflections for refinement.  R-factors based
 on F^2^ are statistically about twice as large as those based on F, and R-
 factors based on ALL data will be even larger.
;
 
_refine_ls_structure_factor_coef  Fsqd
_refine_ls_matrix_type            full
_refine_ls_weighting_scheme       calc
_refine_ls_weighting_details
 'calc w=1/[\s^2^(Fo^2^)+(0.0241P)^2^+1.6629P] where P=(Fo^2^+2Fc^2^)/3'
_atom_sites_solution_primary      direct
_atom_sites_solution_secondary    difmap
_atom_sites_solution_hydrogens    geom
_refine_ls_hydrogen_treatment     mixed
_refine_ls_extinction_method      none
_refine_ls_extinction_coef        ?
_refine_ls_number_reflns          5398
_refine_ls_number_parameters      358
_refine_ls_number_restraints      0
_refine_ls_R_factor_all           0.0231
_refine_ls_R_factor_gt            0.0203
_refine_ls_wR_factor_ref          0.0489
_refine_ls_wR_factor_gt           0.0478
_refine_ls_goodness_of_fit_ref    1.082
_refine_ls_restrained_S_all       1.082
_refine_ls_shift/su_max           0.014
_refine_ls_shift/su_mean          0.000
 
loop_
 _atom_site_label
 _atom_site_type_symbol
 _atom_site_fract_x
 _atom_site_fract_y
 _atom_site_fract_z
 _atom_site_U_iso_or_equiv
 _atom_site_adp_type
 _atom_site_occupancy
 _atom_site_symmetry_multiplicity
 _atom_site_calc_flag
 _atom_site_refinement_flags
 _atom_site_disorder_assembly
 _atom_site_disorder_group
Sn1 Sn 0.049927(10) 0.649428(15) 0.311670(7) 0.01210(5) Uani 1 1 d . . .
Sn2 Sn 0.560842(10) 0.766713(15) 0.788636(7) 0.01228(5) Uani 1 1 d . . .
O1 O 0.15084(11) 0.60851(17) 0.39667(7) 0.0172(3) Uani 1 1 d . . .
O2 O 0.05136(11) 0.65860(18) 0.47220(8) 0.0217(4) Uani 1 1 d . . .
O3 O 0.45844(11) 0.72908(17) 0.70274(8) 0.0181(4) Uani 1 1 d . . .
O4 O 0.55760(12) 0.65837(17) 0.63102(8) 0.0216(4) Uani 1 1 d . . .
C9 C 0.41978(17) 0.9103(2) 0.55568(11) 0.0169(5) Uani 1 1 d . . .
O5 O 0.48735(12) 0.97233(18) 0.57163(9) 0.0253(4) Uani 1 1 d . . .
C2 C 0.22034(16) 0.6344(2) 0.50578(11) 0.0129(5) Uani 1 1 d . . .
C3 C 0.31506(16) 0.6107(2) 0.48732(11) 0.0136(5) Uani 1 1 d . . .
H3 H 0.3236 0.6046 0.4407 0.016 Uiso 1 1 calc R . .
C4 C 0.39709(16) 0.6220(2) 0.53361(11) 0.0133(5) Uani 1 1 d . . .
H4 H 0.4616 0.6242 0.5184 0.016 Uiso 1 1 calc R . .
N2 N 0.65847(13) 0.79428(19) 0.89865(9) 0.0146(4) Uani 1 1 d . . .
C23 C 0.83355(16) 0.7449(2) 1.08309(11) 0.0135(5) Uani 1 1 d . . .
C10 C 0.23295(17) 0.9325(2) 0.56303(11) 0.0164(5) Uani 1 1 d . . .
C14 C 0.0179(2) 0.8428(2) 0.33834(13) 0.0239(6) Uani 1 1 d . . .
H14A H 0.0697 0.8751 0.3692 0.036 Uiso 1 1 calc R . .
H14B H -0.0417 0.8438 0.3580 0.036 Uiso 1 1 calc R . .
H14C H 0.0114 0.8966 0.2999 0.036 Uiso 1 1 calc R . .
C13 C -0.05135(16) 0.5014(2) 0.32878(12) 0.0174(5) Uani 1 1 d . . .
H13A H -0.0643 0.5046 0.3737 0.026 Uiso 1 1 calc R . .
H13B H -0.0247 0.4182 0.3199 0.026 Uiso 1 1 calc R . .
H13C H -0.1107 0.5146 0.3005 0.026 Uiso 1 1 calc R . .
C1 C 0.13169(16) 0.6342(2) 0.45554(11) 0.0150(5) Uani 1 1 d . . .
C5 C 0.38725(16) 0.6594(2) 0.59926(11) 0.0133(5) Uani 1 1 d . . .
C8 C 0.47722(16) 0.6834(2) 0.64745(11) 0.0148(5) Uani 1 1 d . . .
C17 C 0.63335(16) 0.9242(2) 0.74826(11) 0.0171(5) Uani 1 1 d . . .
H17A H 0.7006 0.9242 0.7660 0.026 Uiso 1 1 calc R . .
H17B H 0.6038 1.0043 0.7592 0.026 Uiso 1 1 calc R . .
H17C H 0.6284 0.9152 0.7014 0.026 Uiso 1 1 calc R . .
C18 C 0.75329(16) 0.8223(2) 0.90598(11) 0.0159(5) Uani 1 1 d . . .
H18 H 0.7808 0.8517 0.8695 0.019 Uiso 1 1 calc R . .
C19 C 0.81319(16) 0.8104(2) 0.96454(11) 0.0154(5) Uani 1 1 d . . .
H19 H 0.8789 0.8307 0.9668 0.018 Uiso 1 1 calc R . .
C20 C 0.77320(16) 0.7674(2) 1.02000(11) 0.0133(5) Uani 1 1 d . . .
C21 C 0.67334(17) 0.7399(2) 1.01330(11) 0.0160(5) Uani 1 1 d . . .
H21 H 0.6434 0.7125 1.0492 0.019 Uiso 1 1 calc R . .
C22 C 0.62025(17) 0.7540(2) 0.95255(12) 0.0169(5) Uani 1 1 d . . .
H22 H 0.5543 0.7346 0.9486 0.020 Uiso 1 1 calc R . .
C24 C 0.92719(16) 0.6929(2) 1.08464(11) 0.0156(5) Uani 1 1 d . . .
H24 H 0.9535 0.6764 1.0458 0.019 Uiso 1 1 calc R . .
C25 C 0.97977(16) 0.6666(2) 1.14408(11) 0.0148(5) Uani 1 1 d . . .
H25 H 1.0411 0.6300 1.1441 0.018 Uiso 1 1 calc R . .
N1 N 0.94739(13) 0.6909(2) 1.20219(9) 0.0147(4) Uani 1 1 d . . .
C26 C 0.85777(16) 0.7421(2) 1.20040(12) 0.0162(5) Uani 1 1 d . . .
H26 H 0.8342 0.7600 1.2401 0.019 Uiso 1 1 calc R . .
C27 C 0.79885(17) 0.7696(2) 1.14333(11) 0.0167(5) Uani 1 1 d . . .
H27 H 0.7371 0.8040 1.1448 0.020 Uiso 1 1 calc R . .
C15 C 0.62783(18) 0.5815(2) 0.78866(12) 0.0217(5) Uani 1 1 d . . .
H15A H 0.5896 0.5198 0.8096 0.032 Uiso 1 1 calc R . .
H15B H 0.6918 0.5861 0.8121 0.032 Uiso 1 1 calc R . .
H15C H 0.6323 0.5549 0.7443 0.032 Uiso 1 1 calc R . .
C16 C 0.43771(16) 0.8075(3) 0.83818(12) 0.0205(5) Uani 1 1 d . . .
H16A H 0.4242 0.7342 0.8645 0.031 Uiso 1 1 calc R . .
H16B H 0.3826 0.8246 0.8066 0.031 Uiso 1 1 calc R . .
H16C H 0.4508 0.8819 0.8658 0.031 Uiso 1 1 calc R . .
C6 C 0.29369(16) 0.6779(2) 0.61837(11) 0.0135(5) Uani 1 1 d . . .
H6 H 0.2869 0.7167 0.6612 0.016 Uiso 1 1 calc R . .
C7 C 0.21087(16) 0.6663(2) 0.57146(11) 0.0129(5) Uani 1 1 d . . .
H7 H 0.1480 0.6974 0.5827 0.016 Uiso 1 1 calc R . .
Cr1 Cr 0.31148(2) 0.80542(4) 0.533935(17) 0.01081(8) Uani 1 1 d . . .
O6 O 0.18065(13) 1.00836(18) 0.58133(9) 0.0269(4) Uani 1 1 d . . .
C11 C 0.29023(16) 0.8817(2) 0.45079(12) 0.0168(5) Uani 1 1 d . . .
O7 O 0.27431(13) 0.93108(18) 0.40062(8) 0.0272(4) Uani 1 1 d . . .
C12 C 0.16731(18) 0.6166(3) 0.25545(12) 0.0299(6) Uani 1 1 d . . .
H12A H 0.1794 0.6939 0.2316 0.045 Uiso 1 1 calc R . .
H12B H 0.1510 0.5470 0.2251 0.045 Uiso 1 1 calc R . .
H12C H 0.2245 0.5942 0.2842 0.045 Uiso 1 1 calc R . .
 
loop_
 _atom_site_aniso_label
 _atom_site_aniso_U_11
 _atom_site_aniso_U_22
 _atom_site_aniso_U_33
 _atom_site_aniso_U_23
 _atom_site_aniso_U_13
 _atom_site_aniso_U_12
Sn1 0.01024(8) 0.01394(9) 0.01192(8) -0.00024(6) 0.00041(6) -0.00078(5)
Sn2 0.01022(8) 0.01534(9) 0.01102(8) 0.00035(6) 0.00004(6) 0.00107(5)
O1 0.0164(8) 0.0229(9) 0.0115(8) -0.0020(7) -0.0015(6) 0.0033(7)
O2 0.0109(9) 0.0338(11) 0.0199(9) -0.0026(8) -0.0006(7) 0.0004(7)
O3 0.0153(9) 0.0238(10) 0.0142(8) -0.0018(7) -0.0024(6) -0.0002(6)
O4 0.0129(9) 0.0326(11) 0.0190(9) 0.0040(8) 0.0002(7) 0.0005(7)
C9 0.0189(13) 0.0165(13) 0.0153(11) 0.0039(10) 0.0020(9) 0.0013(10)
O5 0.0202(9) 0.0247(10) 0.0299(10) 0.0027(8) -0.0011(7) -0.0093(8)
C2 0.0118(11) 0.0122(12) 0.0148(11) 0.0016(9) 0.0015(9) -0.0004(8)
C3 0.0162(12) 0.0115(11) 0.0132(11) 0.0010(9) 0.0021(9) -0.0002(9)
C4 0.0110(11) 0.0115(11) 0.0173(11) 0.0012(9) 0.0017(8) 0.0004(8)
N2 0.0139(10) 0.0168(11) 0.0130(10) -0.0009(8) 0.0005(7) -0.0002(8)
C23 0.0143(12) 0.0101(12) 0.0156(11) 0.0009(9) -0.0004(9) -0.0031(8)
C10 0.0185(12) 0.0138(12) 0.0169(11) 0.0031(10) 0.0017(9) -0.0040(9)
C14 0.0345(15) 0.0149(13) 0.0204(13) -0.0014(10) -0.0049(11) 0.0016(10)
C13 0.0178(12) 0.0149(12) 0.0199(12) -0.0002(10) 0.0032(9) -0.0028(9)
C1 0.0162(12) 0.0110(12) 0.0173(12) 0.0011(9) 0.0004(9) -0.0013(9)
C5 0.0146(12) 0.0104(12) 0.0144(11) 0.0026(9) -0.0008(9) 0.0004(8)
C8 0.0174(12) 0.0127(12) 0.0138(11) 0.0057(9) -0.0009(9) -0.0004(9)
C17 0.0161(12) 0.0182(13) 0.0172(12) 0.0011(10) 0.0023(9) -0.0003(9)
C18 0.0159(12) 0.0192(13) 0.0127(11) 0.0007(10) 0.0026(9) -0.0023(9)
C19 0.0121(11) 0.0160(12) 0.0180(12) 0.0000(10) 0.0014(9) -0.0003(9)
C20 0.0149(12) 0.0116(12) 0.0133(11) -0.0028(9) 0.0003(9) 0.0012(8)
C21 0.0153(12) 0.0203(13) 0.0126(11) 0.0013(10) 0.0034(9) -0.0023(9)
C22 0.0126(12) 0.0201(13) 0.0178(12) -0.0005(10) 0.0011(9) -0.0014(9)
C24 0.0170(12) 0.0142(12) 0.0156(12) 0.0002(10) 0.0024(9) -0.0005(9)
C25 0.0136(12) 0.0121(12) 0.0184(12) 0.0004(9) 0.0003(9) -0.0004(8)
N1 0.0155(10) 0.0130(10) 0.0150(10) 0.0009(8) 0.0001(8) -0.0032(7)
C26 0.0142(12) 0.0209(13) 0.0138(11) -0.0009(10) 0.0027(9) -0.0021(9)
C27 0.0139(12) 0.0191(13) 0.0170(12) -0.0001(10) 0.0011(9) 0.0003(9)
C15 0.0245(13) 0.0203(14) 0.0190(12) 0.0004(10) -0.0025(10) 0.0077(10)
C16 0.0129(12) 0.0305(15) 0.0186(12) 0.0018(11) 0.0033(9) 0.0029(10)
C6 0.0166(12) 0.0117(12) 0.0120(11) 0.0026(9) 0.0014(9) -0.0013(9)
C7 0.0110(11) 0.0129(12) 0.0151(11) 0.0035(9) 0.0028(8) 0.0007(8)
Cr1 0.00988(18) 0.01214(19) 0.01034(17) 0.00081(14) 0.00089(13) -0.00024(13)
O6 0.0274(10) 0.0203(10) 0.0348(10) -0.0024(8) 0.0111(8) 0.0060(8)
C11 0.0162(12) 0.0154(12) 0.0190(13) -0.0010(10) 0.0028(9) -0.0001(9)
O7 0.0351(11) 0.0284(11) 0.0178(9) 0.0078(8) 0.0018(7) 0.0035(8)
C12 0.0129(13) 0.059(2) 0.0179(13) -0.0027(13) 0.0012(10) -0.0006(12)
 
_geom_special_details
;
 All esds (except the esd in the dihedral angle between two l.s. planes)
 are estimated using the full covariance matrix.  The cell esds are taken
 into account individually in the estimation of esds in distances, angles
 and torsion angles; correlations between esds in cell parameters are only
 used when they are defined by crystal symmetry.  An approximate (isotropic)
 treatment of cell esds is used for estimating esds involving l.s. planes.
;
 
loop_
 _geom_bond_atom_site_label_1
 _geom_bond_atom_site_label_2
 _geom_bond_distance
 _geom_bond_site_symmetry_2
 _geom_bond_publ_flag
Sn1 C12 2.127(2) . ?
Sn1 C14 2.128(2) . ?
Sn1 C13 2.130(2) . ?
Sn1 O1 2.1479(15) . ?
Sn1 N1 2.5521(18) 1_454 ?
Sn2 C15 2.124(2) . ?
Sn2 C16 2.126(2) . ?
Sn2 C17 2.128(2) . ?
Sn2 O3 2.1668(15) . ?
Sn2 N2 2.5107(19) . ?
O1 C1 1.294(3) . ?
O2 C1 1.228(3) . ?
O3 C8 1.283(3) . ?
O4 C8 1.228(3) . ?
C9 O5 1.150(3) . ?
C9 Cr1 1.862(2) . ?
C2 C7 1.409(3) . ?
C2 C3 1.429(3) . ?
C2 C1 1.510(3) . ?
C2 Cr1 2.207(2) . ?
C3 C4 1.400(3) . ?
C3 Cr1 2.228(2) . ?
C3 H3 0.9800 . ?
C4 C5 1.423(3) . ?
C4 Cr1 2.234(2) . ?
C4 H4 0.9800 . ?
N2 C18 1.337(3) . ?
N2 C22 1.346(3) . ?
C23 C27 1.401(3) . ?
C23 C24 1.401(3) . ?
C23 C20 1.476(3) . ?
C10 O6 1.158(3) . ?
C10 Cr1 1.846(2) . ?
C14 H14A 0.9600 . ?
C14 H14B 0.9600 . ?
C14 H14C 0.9600 . ?
C13 H13A 0.9600 . ?
C13 H13B 0.9600 . ?
C13 H13C 0.9600 . ?
C5 C6 1.410(3) . ?
C5 C8 1.519(3) . ?
C5 Cr1 2.201(2) . ?
C17 H17A 0.9600 . ?
C17 H17B 0.9600 . ?
C17 H17C 0.9600 . ?
C18 C19 1.385(3) . ?
C18 H18 0.9300 . ?
C19 C20 1.395(3) . ?
C19 H19 0.9300 . ?
C20 C21 1.404(3) . ?
C21 C22 1.380(3) . ?
C21 H21 0.9300 . ?
C22 H22 0.9300 . ?
C24 C25 1.374(3) . ?
C24 H24 0.9300 . ?
C25 N1 1.346(3) . ?
C25 H25 0.9300 . ?
N1 C26 1.346(3) . ?
N1 Sn1 2.5521(18) 1_656 ?
C26 C27 1.378(3) . ?
C26 H26 0.9300 . ?
C27 H27 0.9300 . ?
C15 H15A 0.9600 . ?
C15 H15B 0.9600 . ?
C15 H15C 0.9600 . ?
C16 H16A 0.9600 . ?
C16 H16B 0.9600 . ?
C16 H16C 0.9600 . ?
C6 C7 1.415(3) . ?
C6 Cr1 2.212(2) . ?
C6 H6 0.9800 . ?
C7 Cr1 2.200(2) . ?
C7 H7 0.9800 . ?
Cr1 C11 1.871(2) . ?
C11 O7 1.147(3) . ?
C12 H12A 0.9600 . ?
C12 H12B 0.9600 . ?
C12 H12C 0.9600 . ?
 
loop_
 _geom_angle_atom_site_label_1
 _geom_angle_atom_site_label_2
 _geom_angle_atom_site_label_3
 _geom_angle
 _geom_angle_site_symmetry_1
 _geom_angle_site_symmetry_3
 _geom_angle_publ_flag
C12 Sn1 C14 118.91(12) . . ?
C12 Sn1 C13 122.33(11) . . ?
C14 Sn1 C13 117.95(10) . . ?
C12 Sn1 O1 86.70(8) . . ?
C14 Sn1 O1 96.35(8) . . ?
C13 Sn1 O1 96.01(8) . . ?
C12 Sn1 N1 86.09(8) . 1_454 ?
C14 Sn1 N1 87.59(8) . 1_454 ?
C13 Sn1 N1 87.42(8) . 1_454 ?
O1 Sn1 N1 172.78(6) . 1_454 ?
C15 Sn2 C16 123.53(10) . . ?
C15 Sn2 C17 117.45(10) . . ?
C16 Sn2 C17 118.44(10) . . ?
C15 Sn2 O3 94.83(8) . . ?
C16 Sn2 O3 86.46(8) . . ?
C17 Sn2 O3 96.56(8) . . ?
C15 Sn2 N2 84.93(8) . . ?
C16 Sn2 N2 85.78(8) . . ?
C17 Sn2 N2 91.95(8) . . ?
O3 Sn2 N2 170.50(6) . . ?
C1 O1 Sn1 122.26(14) . . ?
C8 O3 Sn2 127.22(14) . . ?
O5 C9 Cr1 177.1(2) . . ?
C7 C2 C3 118.9(2) . . ?
C7 C2 C1 119.7(2) . . ?
C3 C2 C1 121.2(2) . . ?
C7 C2 Cr1 71.09(13) . . ?
C3 C2 Cr1 72.00(13) . . ?
C1 C2 Cr1 125.14(15) . . ?
C4 C3 C2 120.3(2) . . ?
C4 C3 Cr1 71.93(13) . . ?
C2 C3 Cr1 70.43(13) . . ?
C4 C3 H3 119.2 . . ?
C2 C3 H3 119.2 . . ?
Cr1 C3 H3 119.2 . . ?
C3 C4 C5 120.4(2) . . ?
C3 C4 Cr1 71.51(13) . . ?
C5 C4 Cr1 70.03(13) . . ?
C3 C4 H4 119.0 . . ?
C5 C4 H4 119.0 . . ?
Cr1 C4 H4 119.0 . . ?
C18 N2 C22 116.68(19) . . ?
C18 N2 Sn2 123.12(15) . . ?
C22 N2 Sn2 118.81(15) . . ?
C27 C23 C24 117.4(2) . . ?
C27 C23 C20 121.9(2) . . ?
C24 C23 C20 120.6(2) . . ?
O6 C10 Cr1 177.2(2) . . ?
Sn1 C14 H14A 109.5 . . ?
Sn1 C14 H14B 109.5 . . ?
H14A C14 H14B 109.5 . . ?
Sn1 C14 H14C 109.5 . . ?
H14A C14 H14C 109.5 . . ?
H14B C14 H14C 109.5 . . ?
Sn1 C13 H13A 109.5 . . ?
Sn1 C13 H13B 109.5 . . ?
H13A C13 H13B 109.5 . . ?
Sn1 C13 H13C 109.5 . . ?
H13A C13 H13C 109.5 . . ?
H13B C13 H13C 109.5 . . ?
O2 C1 O1 126.3(2) . . ?
O2 C1 C2 120.1(2) . . ?
O1 C1 C2 113.55(19) . . ?
C6 C5 C4 119.4(2) . . ?
C6 C5 C8 120.6(2) . . ?
C4 C5 C8 120.0(2) . . ?
C6 C5 Cr1 71.81(12) . . ?
C4 C5 Cr1 72.54(13) . . ?
C8 C5 Cr1 125.68(15) . . ?
O4 C8 O3 127.1(2) . . ?
O4 C8 C5 119.3(2) . . ?
O3 C8 C5 113.61(19) . . ?
Sn2 C17 H17A 109.5 . . ?
Sn2 C17 H17B 109.5 . . ?
H17A C17 H17B 109.5 . . ?
Sn2 C17 H17C 109.5 . . ?
H17A C17 H17C 109.5 . . ?
H17B C17 H17C 109.5 . . ?
N2 C18 C19 124.1(2) . . ?
N2 C18 H18 117.9 . . ?
C19 C18 H18 117.9 . . ?
C18 C19 C20 118.8(2) . . ?
C18 C19 H19 120.6 . . ?
C20 C19 H19 120.6 . . ?
C19 C20 C21 117.7(2) . . ?
C19 C20 C23 121.8(2) . . ?
C21 C20 C23 120.4(2) . . ?
C22 C21 C20 118.9(2) . . ?
C22 C21 H21 120.5 . . ?
C20 C21 H21 120.5 . . ?
N2 C22 C21 123.8(2) . . ?
N2 C22 H22 118.1 . . ?
C21 C22 H22 118.1 . . ?
C25 C24 C23 119.4(2) . . ?
C25 C24 H24 120.3 . . ?
C23 C24 H24 120.3 . . ?
N1 C25 C24 123.6(2) . . ?
N1 C25 H25 118.2 . . ?
C24 C25 H25 118.2 . . ?
C25 N1 C26 116.73(19) . . ?
C25 N1 Sn1 122.72(15) . 1_656 ?
C26 N1 Sn1 120.53(15) . 1_656 ?
N1 C26 C27 123.9(2) . . ?
N1 C26 H26 118.0 . . ?
C27 C26 H26 118.0 . . ?
C26 C27 C23 118.9(2) . . ?
C26 C27 H27 120.6 . . ?
C23 C27 H27 120.6 . . ?
Sn2 C15 H15A 109.5 . . ?
Sn2 C15 H15B 109.5 . . ?
H15A C15 H15B 109.5 . . ?
Sn2 C15 H15C 109.5 . . ?
H15A C15 H15C 109.5 . . ?
H15B C15 H15C 109.5 . . ?
Sn2 C16 H16A 109.5 . . ?
Sn2 C16 H16B 109.5 . . ?
H16A C16 H16B 109.5 . . ?
Sn2 C16 H16C 109.5 . . ?
H16A C16 H16C 109.5 . . ?
H16B C16 H16C 109.5 . . ?
C5 C6 C7 119.9(2) . . ?
C5 C6 Cr1 70.93(13) . . ?
C7 C6 Cr1 70.85(13) . . ?
C5 C6 H6 119.4 . . ?
C7 C6 H6 119.4 . . ?
Cr1 C6 H6 119.4 . . ?
C2 C7 C6 120.9(2) . . ?
C2 C7 Cr1 71.64(13) . . ?
C6 C7 Cr1 71.74(13) . . ?
C2 C7 H7 119.0 . . ?
C6 C7 H7 119.0 . . ?
Cr1 C7 H7 119.0 . . ?
C10 Cr1 C9 89.92(10) . . ?
C10 Cr1 C11 87.70(10) . . ?
C9 Cr1 C11 90.67(10) . . ?
C10 Cr1 C7 85.91(9) . . ?
C9 Cr1 C7 145.14(9) . . ?
C11 Cr1 C7 123.64(9) . . ?
C10 Cr1 C5 123.11(9) . . ?
C9 Cr1 C5 86.39(9) . . ?
C11 Cr1 C5 149.00(10) . . ?
C7 Cr1 C5 67.52(8) . . ?
C10 Cr1 C2 108.14(9) . . ?
C9 Cr1 C2 161.45(10) . . ?
C11 Cr1 C2 94.15(9) . . ?
C7 Cr1 C2 37.27(8) . . ?
C5 Cr1 C2 80.26(8) . . ?
C10 Cr1 C6 92.62(9) . . ?
C9 Cr1 C6 108.51(9) . . ?
C11 Cr1 C6 160.81(9) . . ?
C7 Cr1 C6 37.41(8) . . ?
C5 Cr1 C6 37.27(8) . . ?
C2 Cr1 C6 67.52(8) . . ?
C10 Cr1 C3 145.30(9) . . ?
C9 Cr1 C3 124.72(9) . . ?
C11 Cr1 C3 89.81(9) . . ?
C7 Cr1 C3 66.98(8) . . ?
C5 Cr1 C3 67.16(8) . . ?
C2 Cr1 C3 37.57(8) . . ?
C6 Cr1 C3 79.06(9) . . ?
C10 Cr1 C4 159.29(9) . . ?
C9 Cr1 C4 94.56(9) . . ?
C11 Cr1 C4 112.41(9) . . ?
C7 Cr1 C4 78.87(8) . . ?
C5 Cr1 C4 37.43(8) . . ?
C2 Cr1 C4 67.05(8) . . ?
C6 Cr1 C4 66.78(8) . . ?
C3 Cr1 C4 36.56(8) . . ?
O7 C11 Cr1 177.4(2) . . ?
Sn1 C12 H12A 109.5 . . ?
Sn1 C12 H12B 109.5 . . ?
H12A C12 H12B 109.5 . . ?
Sn1 C12 H12C 109.5 . . ?
H12A C12 H12C 109.5 . . ?
H12B C12 H12C 109.5 . . ?
 
loop_
 _geom_torsion_atom_site_label_1
 _geom_torsion_atom_site_label_2
 _geom_torsion_atom_site_label_3
 _geom_torsion_atom_site_label_4
 _geom_torsion
 _geom_torsion_site_symmetry_1
 _geom_torsion_site_symmetry_2
 _geom_torsion_site_symmetry_3
 _geom_torsion_site_symmetry_4
 _geom_torsion_publ_flag
C12 Sn1 O1 C1 166.76(19) . . . . ?
C14 Sn1 O1 C1 48.02(19) . . . . ?
C13 Sn1 O1 C1 -71.05(18) . . . . ?
N1 Sn1 O1 C1 170.9(4) 1_454 . . . ?
C15 Sn2 O3 C8 -49.6(2) . . . . ?
C16 Sn2 O3 C8 -173.0(2) . . . . ?
C17 Sn2 O3 C8 68.8(2) . . . . ?
N2 Sn2 O3 C8 -137.7(4) . . . . ?
C7 C2 C3 C4 -1.4(3) . . . . ?
C1 C2 C3 C4 174.6(2) . . . . ?
Cr1 C2 C3 C4 53.9(2) . . . . ?
C7 C2 C3 Cr1 -55.32(19) . . . . ?
C1 C2 C3 Cr1 120.7(2) . . . . ?
C2 C3 C4 C5 -1.1(3) . . . . ?
Cr1 C3 C4 C5 52.12(19) . . . . ?
C2 C3 C4 Cr1 -53.21(19) . . . . ?
C15 Sn2 N2 C18 77.49(19) . . . . ?
C16 Sn2 N2 C18 -158.3(2) . . . . ?
C17 Sn2 N2 C18 -39.90(19) . . . . ?
O3 Sn2 N2 C18 166.4(3) . . . . ?
C15 Sn2 N2 C22 -88.57(18) . . . . ?
C16 Sn2 N2 C22 35.67(18) . . . . ?
C17 Sn2 N2 C22 154.04(18) . . . . ?
O3 Sn2 N2 C22 0.4(5) . . . . ?
Sn1 O1 C1 O2 15.6(3) . . . . ?
Sn1 O1 C1 C2 -163.47(14) . . . . ?
C7 C2 C1 O2 -1.8(3) . . . . ?
C3 C2 C1 O2 -177.8(2) . . . . ?
Cr1 C2 C1 O2 -88.7(2) . . . . ?
C7 C2 C1 O1 177.3(2) . . . . ?
C3 C2 C1 O1 1.3(3) . . . . ?
Cr1 C2 C1 O1 90.4(2) . . . . ?
C3 C4 C5 C6 3.6(3) . . . . ?
Cr1 C4 C5 C6 56.40(19) . . . . ?
C3 C4 C5 C8 -174.4(2) . . . . ?
Cr1 C4 C5 C8 -121.6(2) . . . . ?
C3 C4 C5 Cr1 -52.8(2) . . . . ?
Sn2 O3 C8 O4 -4.2(4) . . . . ?
Sn2 O3 C8 C5 175.63(14) . . . . ?
C6 C5 C8 O4 175.2(2) . . . . ?
C4 C5 C8 O4 -6.8(3) . . . . ?
Cr1 C5 C8 O4 -96.1(2) . . . . ?
C6 C5 C8 O3 -4.7(3) . . . . ?
C4 C5 C8 O3 173.3(2) . . . . ?
Cr1 C5 C8 O3 84.0(2) . . . . ?
C22 N2 C18 C19 1.1(3) . . . . ?
Sn2 N2 C18 C19 -165.26(18) . . . . ?
N2 C18 C19 C20 -0.5(4) . . . . ?
C18 C19 C20 C21 -0.7(3) . . . . ?
C18 C19 C20 C23 176.3(2) . . . . ?
C27 C23 C20 C19 145.3(2) . . . . ?
C24 C23 C20 C19 -37.2(3) . . . . ?
C27 C23 C20 C21 -37.8(3) . . . . ?
C24 C23 C20 C21 139.8(2) . . . . ?
C19 C20 C21 C22 1.2(3) . . . . ?
C23 C20 C21 C22 -175.8(2) . . . . ?
C18 N2 C22 C21 -0.5(3) . . . . ?
Sn2 N2 C22 C21 166.46(19) . . . . ?
C20 C21 C22 N2 -0.6(4) . . . . ?
C27 C23 C24 C25 1.1(3) . . . . ?
C20 C23 C24 C25 -176.6(2) . . . . ?
C23 C24 C25 N1 -1.7(4) . . . . ?
C24 C25 N1 C26 1.0(3) . . . . ?
C24 C25 N1 Sn1 -177.38(17) . . . 1_656 ?
C25 N1 C26 C27 0.3(3) . . . . ?
Sn1 N1 C26 C27 178.70(18) 1_656 . . . ?
N1 C26 C27 C23 -0.8(4) . . . . ?
C24 C23 C27 C26 0.1(3) . . . . ?
C20 C23 C27 C26 177.7(2) . . . . ?
C4 C5 C6 C7 -3.6(3) . . . . ?
C8 C5 C6 C7 174.4(2) . . . . ?
Cr1 C5 C6 C7 53.17(19) . . . . ?
C4 C5 C6 Cr1 -56.75(19) . . . . ?
C8 C5 C6 Cr1 121.3(2) . . . . ?
C3 C2 C7 C6 1.4(3) . . . . ?
C1 C2 C7 C6 -174.7(2) . . . . ?
Cr1 C2 C7 C6 -54.34(19) . . . . ?
C3 C2 C7 Cr1 55.77(19) . . . . ?
C1 C2 C7 Cr1 -120.3(2) . . . . ?
C5 C6 C7 C2 1.1(3) . . . . ?
Cr1 C6 C7 C2 54.29(19) . . . . ?
C5 C6 C7 Cr1 -53.20(19) . . . . ?
O6 C10 Cr1 C9 -164(4) . . . . ?
O6 C10 Cr1 C11 105(4) . . . . ?
O6 C10 Cr1 C7 -19(4) . . . . ?
O6 C10 Cr1 C5 -79(4) . . . . ?
O6 C10 Cr1 C2 12(4) . . . . ?
O6 C10 Cr1 C6 -56(4) . . . . ?
O6 C10 Cr1 C3 19(4) . . . . ?
O6 C10 Cr1 C4 -61(4) . . . . ?
O5 C9 Cr1 C10 96(4) . . . . ?
O5 C9 Cr1 C11 -176(4) . . . . ?
O5 C9 Cr1 C7 13(4) . . . . ?
O5 C9 Cr1 C5 -27(4) . . . . ?
O5 C9 Cr1 C2 -71(4) . . . . ?
O5 C9 Cr1 C6 3(4) . . . . ?
O5 C9 Cr1 C3 -86(4) . . . . ?
O5 C9 Cr1 C4 -64(4) . . . . ?
C2 C7 Cr1 C10 127.54(14) . . . . ?
C6 C7 Cr1 C10 -99.72(14) . . . . ?
C2 C7 Cr1 C9 -148.48(17) . . . . ?
C6 C7 Cr1 C9 -15.7(2) . . . . ?
C2 C7 Cr1 C11 43.05(17) . . . . ?
C6 C7 Cr1 C11 175.79(14) . . . . ?
C2 C7 Cr1 C5 -103.97(14) . . . . ?
C6 C7 Cr1 C5 28.77(13) . . . . ?
C6 C7 Cr1 C2 132.7(2) . . . . ?
C2 C7 Cr1 C6 -132.7(2) . . . . ?
C2 C7 Cr1 C3 -30.26(13) . . . . ?
C6 C7 Cr1 C3 102.48(14) . . . . ?
C2 C7 Cr1 C4 -66.57(13) . . . . ?
C6 C7 Cr1 C4 66.17(14) . . . . ?
C6 C5 Cr1 C10 39.90(17) . . . . ?
C4 C5 Cr1 C10 170.13(13) . . . . ?
C8 C5 Cr1 C10 -75.1(2) . . . . ?
C6 C5 Cr1 C9 127.45(15) . . . . ?
C4 C5 Cr1 C9 -102.32(14) . . . . ?
C8 C5 Cr1 C9 12.4(2) . . . . ?
C6 C5 Cr1 C11 -147.25(18) . . . . ?
C4 C5 Cr1 C11 -17.0(2) . . . . ?
C8 C5 Cr1 C11 97.7(2) . . . . ?
C6 C5 Cr1 C7 -28.87(13) . . . . ?
C4 C5 Cr1 C7 101.36(14) . . . . ?
C8 C5 Cr1 C7 -143.9(2) . . . . ?
C6 C5 Cr1 C2 -65.48(14) . . . . ?
C4 C5 Cr1 C2 64.75(13) . . . . ?
C8 C5 Cr1 C2 179.5(2) . . . . ?
C4 C5 Cr1 C6 130.23(19) . . . . ?
C8 C5 Cr1 C6 -115.0(2) . . . . ?
C6 C5 Cr1 C3 -102.32(14) . . . . ?
C4 C5 Cr1 C3 27.91(13) . . . . ?
C8 C5 Cr1 C3 142.7(2) . . . . ?
C6 C5 Cr1 C4 -130.23(19) . . . . ?
C8 C5 Cr1 C4 114.7(2) . . . . ?
C7 C2 Cr1 C10 -56.33(15) . . . . ?
C3 C2 Cr1 C10 173.20(13) . . . . ?
C1 C2 Cr1 C10 57.2(2) . . . . ?
C7 C2 Cr1 C9 110.1(3) . . . . ?
C3 C2 Cr1 C9 -20.4(3) . . . . ?
C1 C2 Cr1 C9 -136.4(3) . . . . ?
C7 C2 Cr1 C11 -145.27(14) . . . . ?
C3 C2 Cr1 C11 84.26(14) . . . . ?
C1 C2 Cr1 C11 -31.7(2) . . . . ?
C3 C2 Cr1 C7 -130.47(19) . . . . ?
C1 C2 Cr1 C7 113.5(2) . . . . ?
C7 C2 Cr1 C5 65.47(13) . . . . ?
C3 C2 Cr1 C5 -65.00(13) . . . . ?
C1 C2 Cr1 C5 179.0(2) . . . . ?
C7 C2 Cr1 C6 28.87(13) . . . . ?
C3 C2 Cr1 C6 -101.59(14) . . . . ?
C1 C2 Cr1 C6 142.4(2) . . . . ?
C7 C2 Cr1 C3 130.47(19) . . . . ?
C1 C2 Cr1 C3 -116.0(2) . . . . ?
C7 C2 Cr1 C4 102.13(14) . . . . ?
C3 C2 Cr1 C4 -28.34(13) . . . . ?
C1 C2 Cr1 C4 -144.3(2) . . . . ?
C5 C6 Cr1 C10 -147.46(14) . . . . ?
C7 C6 Cr1 C10 79.79(14) . . . . ?
C5 C6 Cr1 C9 -56.67(15) . . . . ?
C7 C6 Cr1 C9 170.59(14) . . . . ?
C5 C6 Cr1 C11 122.0(3) . . . . ?
C7 C6 Cr1 C11 -10.7(3) . . . . ?
C5 C6 Cr1 C7 132.7(2) . . . . ?
C7 C6 Cr1 C5 -132.7(2) . . . . ?
C5 C6 Cr1 C2 103.97(15) . . . . ?
C7 C6 Cr1 C2 -28.77(13) . . . . ?
C5 C6 Cr1 C3 66.50(13) . . . . ?
C7 C6 Cr1 C3 -66.24(13) . . . . ?
C5 C6 Cr1 C4 30.33(13) . . . . ?
C7 C6 Cr1 C4 -102.42(15) . . . . ?
C4 C3 Cr1 C10 -144.19(17) . . . . ?
C2 C3 Cr1 C10 -11.4(2) . . . . ?
C4 C3 Cr1 C9 39.45(17) . . . . ?
C2 C3 Cr1 C9 172.24(13) . . . . ?
C4 C3 Cr1 C11 130.13(14) . . . . ?
C2 C3 Cr1 C11 -97.07(14) . . . . ?
C4 C3 Cr1 C7 -102.75(14) . . . . ?
C2 C3 Cr1 C7 30.04(13) . . . . ?
C4 C3 Cr1 C5 -28.53(13) . . . . ?
C2 C3 Cr1 C5 104.26(14) . . . . ?
C4 C3 Cr1 C2 -132.8(2) . . . . ?
C4 C3 Cr1 C6 -65.58(13) . . . . ?
C2 C3 Cr1 C6 67.21(13) . . . . ?
C2 C3 Cr1 C4 132.8(2) . . . . ?
C3 C4 Cr1 C10 109.6(3) . . . . ?
C5 C4 Cr1 C10 -24.0(3) . . . . ?
C3 C4 Cr1 C9 -148.41(14) . . . . ?
C5 C4 Cr1 C9 78.00(14) . . . . ?
C3 C4 Cr1 C11 -55.79(15) . . . . ?
C5 C4 Cr1 C11 170.61(13) . . . . ?
C3 C4 Cr1 C7 66.19(14) . . . . ?
C5 C4 Cr1 C7 -67.41(13) . . . . ?
C3 C4 Cr1 C5 133.6(2) . . . . ?
C3 C4 Cr1 C2 29.07(13) . . . . ?
C5 C4 Cr1 C2 -104.53(14) . . . . ?
C3 C4 Cr1 C6 103.40(14) . . . . ?
C5 C4 Cr1 C6 -30.20(13) . . . . ?
C5 C4 Cr1 C3 -133.6(2) . . . . ?
C10 Cr1 C11 O7 -15(5) . . . . ?
C9 Cr1 C11 O7 -105(5) . . . . ?
C7 Cr1 C11 O7 69(5) . . . . ?
C5 Cr1 C11 O7 171(5) . . . . ?
C2 Cr1 C11 O7 93(5) . . . . ?
C6 Cr1 C11 O7 76(5) . . . . ?
C3 Cr1 C11 O7 130(5) . . . . ?
C4 Cr1 C11 O7 160(5) . . . . ?
 
_diffrn_measured_fraction_theta_max    0.997
_diffrn_reflns_theta_full              25.50
_diffrn_measured_fraction_theta_full   0.997
_refine_diff_density_max    0.433
_refine_diff_density_min   -0.602
_refine_diff_density_rms    0.101
#=============end
data_complex7
 
_audit_creation_method            SHELXL-97
_chemical_name_systematic
;
 ?
;
_chemical_name_common             ?
_chemical_melting_point           ?
_chemical_formula_moiety          'C48 H40 Cr O9 Sn2'
_chemical_formula_sum
 'C48 H40 Cr O9 Sn2'
_chemical_formula_weight          1050.18
 
loop_
 _atom_type_symbol
 _atom_type_description
 _atom_type_scat_dispersion_real
 _atom_type_scat_dispersion_imag
 _atom_type_scat_source
 'C'  'C'   0.0033   0.0016
 'International Tables Vol C Tables 4.2.6.8 and 6.1.1.4'
 'H'  'H'   0.0000   0.0000
 'International Tables Vol C Tables 4.2.6.8 and 6.1.1.4'
 'O'  'O'   0.0106   0.0060
 'International Tables Vol C Tables 4.2.6.8 and 6.1.1.4'
 'Cr'  'Cr'   0.3209   0.6236
 'International Tables Vol C Tables 4.2.6.8 and 6.1.1.4'
 'Sn'  'Sn'  -0.6537   1.4246
 'International Tables Vol C Tables 4.2.6.8 and 6.1.1.4'
 
_symmetry_cell_setting            'monoclinic'
_symmetry_space_group_name_H-M    'P 21/n '
_symmetry_space_group_name_Hall '-P 2yn'
loop_
 _symmetry_equiv_pos_as_xyz
 'x, y, z'
 '-x+1/2, y+1/2, -z+1/2'
 '-x, -y, -z'
 'x-1/2, -y-1/2, z-1/2'
 
_cell_length_a                    13.193(5)
_cell_length_b                    18.567(5)
_cell_length_c                    18.021(5)
_cell_angle_alpha                 90.00
_cell_angle_beta                  93.435(5)
_cell_angle_gamma                 90.00
_cell_volume                      4406(2)
_cell_formula_units_Z             4
_cell_measurement_temperature     100(2)
_cell_measurement_reflns_used      9880
_cell_measurement_theta_min        2.19
_cell_measurement_theta_max       28.33
 
_exptl_crystal_description        'block'
_exptl_crystal_colour             'yellow'
_exptl_crystal_size_max           0.17
_exptl_crystal_size_mid           0.15
_exptl_crystal_size_min           0.13
_exptl_crystal_density_meas       ?
_exptl_crystal_density_diffrn     1.583
_exptl_crystal_density_method     'not measured'
_exptl_crystal_F_000              2096
_exptl_absorpt_coefficient_mu     1.422
_exptl_absorpt_correction_type    'empirical'
_exptl_absorpt_correction_T_min   0.785
_exptl_absorpt_correction_T_max   0.831
_exptl_absorpt_process_details    'sadabs'
 
_exptl_special_details
;
 ?
;
 
_diffrn_ambient_temperature       100(2)
_diffrn_radiation_wavelength      0.71073
_diffrn_radiation_type            MoK\a
_diffrn_radiation_source          'fine-focus sealed tube'
_diffrn_radiation_monochromator   graphite
_diffrn_measurement_device_type  'Bruker APEX-II CCD'
_diffrn_measurement_method       '\f and \w scans'
_diffrn_detector_area_resol_mean  ?
_diffrn_standards_number          ?
_diffrn_standards_interval_count  ?
_diffrn_standards_interval_time   ?
_diffrn_standards_decay_%         ?
_diffrn_reflns_number             30927
_diffrn_reflns_av_R_equivalents   0.0388
_diffrn_reflns_av_sigmaI/netI     0.0353
_diffrn_reflns_limit_h_min        -15
_diffrn_reflns_limit_h_max        15
_diffrn_reflns_limit_k_min        -22
_diffrn_reflns_limit_k_max        22
_diffrn_reflns_limit_l_min        -16
_diffrn_reflns_limit_l_max        21
_diffrn_reflns_theta_min          2.16
_diffrn_reflns_theta_max          25.50
_reflns_number_total              8189
_reflns_number_gt                 6918
_reflns_threshold_expression      >2sigma(I)
 
_computing_data_collection       'Bruker APEX2'
_computing_cell_refinement       'Bruker SAINT'
_computing_data_reduction        'Bruker SAINT'
_computing_structure_solution    'SHELXS-97 (Sheldrick 2008)'
_computing_structure_refinement  'SHELXL-2014 (Sheldrick 2014)'
_computing_molecular_graphics    'Bruker SHELXTL'
_computing_publication_material  'Bruker SHELXTL'
 
 
_refine_special_details
;
 Refinement of F^2^ against ALL reflections.  The weighted R-factor wR and
 goodness of fit S are based on F^2^, conventional R-factors R are based
 on F, with F set to zero for negative F^2^. The threshold expression of
 F^2^ > 2sigma(F^2^) is used only for calculating R-factors(gt) etc. and is
 not relevant to the choice of reflections for refinement.  R-factors based
 on F^2^ are statistically about twice as large as those based on F, and R-
 factors based on ALL data will be even larger.
;
 
_refine_ls_structure_factor_coef  Fsqd
_refine_ls_matrix_type            full
_refine_ls_weighting_scheme       calc
_refine_ls_weighting_details
 'calc w=1/[\s^2^(Fo^2^)+(0.0263P)^2^+4.2356P] where P=(Fo^2^+2Fc^2^)/3'
_atom_sites_solution_primary      direct
_atom_sites_solution_secondary    difmap
_atom_sites_solution_hydrogens    geom
_refine_ls_hydrogen_treatment     mixed
_refine_ls_extinction_method      none
_refine_ls_extinction_coef        ?
_refine_ls_number_reflns          8189
_refine_ls_number_parameters      554
_refine_ls_number_restraints      12
_refine_ls_R_factor_all           0.0385
_refine_ls_R_factor_gt            0.0274
_refine_ls_wR_factor_ref          0.0633
_refine_ls_wR_factor_gt           0.0595
_refine_ls_goodness_of_fit_ref    1.038
_refine_ls_restrained_S_all       1.114
_refine_ls_shift/su_max           0.005
_refine_ls_shift/su_mean          0.000
 
loop_
 _atom_site_label
 _atom_site_type_symbol
 _atom_site_fract_x
 _atom_site_fract_y
 _atom_site_fract_z
 _atom_site_U_iso_or_equiv
 _atom_site_adp_type
 _atom_site_occupancy
 _atom_site_symmetry_multiplicity
 _atom_site_calc_flag
 _atom_site_refinement_flags
 _atom_site_disorder_assembly
 _atom_site_disorder_group
Sn2 Sn 0.295659(15) 0.733127(11) 0.123780(12) 0.01397(6) Uani 1 1 d . . .
Sn1 Sn -0.313249(15) 1.108801(11) 0.329535(12) 0.01328(6) Uani 1 1 d . . .
Cr1 Cr -0.03666(4) 0.94058(3) 0.16854(3) 0.01555(12) Uani 1 1 d . . .
O3 O -0.06909(16) 1.09789(11) 0.33426(12) 0.0171(5) Uani 1 1 d . . .
O6 O 0.40174(18) 0.63417(12) 0.08432(14) 0.0203(5) Uani 1 1 d . . .
O1 O -0.44061(18) 1.18738(14) 0.36594(15) 0.0217(5) Uani 1 1 d . . .
O4 O 0.10223(16) 0.74443(11) 0.20362(12) 0.0172(5) Uani 1 1 d . . .
O5 O 0.21076(15) 0.82448(11) 0.16150(12) 0.0170(5) Uani 1 1 d . . .
O2 O -0.20385(15) 1.02885(11) 0.30358(12) 0.0174(5) Uani 1 1 d . . .
O9 O -0.16770(19) 1.06531(14) 0.11723(14) 0.0323(6) Uani 1 1 d . . .
C20 C -0.0429(2) 0.98141(16) 0.28276(17) 0.0134(6) Uani 1 1 d . . .
C22 C -0.0245(2) 0.85460(16) 0.25260(17) 0.0159(7) Uani 1 1 d . . .
H22 H -0.0574 0.8082 0.2416 0.019 Uiso 1 1 calc R . .
C25 C 0.0556(2) 0.99535(16) 0.25954(16) 0.0129(6) Uani 1 1 d . . .
H25 H 0.0773 1.0453 0.2527 0.016 Uiso 1 1 calc R . .
C23 C 0.0723(2) 0.86792(16) 0.22649(17) 0.0135(6) Uani 1 1 d . . .
C19 C -0.1081(2) 1.04189(16) 0.30934(17) 0.0141(7) Uani 1 1 d . . .
C47 C 0.1049(2) 0.73231(18) 0.01612(18) 0.0192(7) Uani 1 1 d . . .
H47 H 0.1086 0.7819 0.0232 0.023 Uiso 1 1 calc R . .
C41 C 0.3490(3) 0.86634(17) 0.03403(19) 0.0217(7) Uani 1 1 d . . .
H41 H 0.2812 0.8772 0.0402 0.026 Uiso 1 1 calc R . .
C37 C 0.4948(2) 0.79125(18) 0.05947(19) 0.0221(7) Uani 1 1 d . . .
H37 H 0.5253 0.7512 0.0823 0.026 Uiso 1 1 calc R . .
C43 C 0.1715(2) 0.61377(17) 0.03812(18) 0.0184(7) Uani 1 1 d . . .
H43 H 0.2198 0.5830 0.0607 0.022 Uiso 1 1 calc R . .
C40 C 0.4061(3) 0.91104(18) -0.0090(2) 0.0248(8) Uani 1 1 d . . .
H40 H 0.3761 0.9512 -0.0320 0.030 Uiso 1 1 calc R . .
C16 C -0.5809(3) 0.94559(19) 0.2261(2) 0.0294(9) Uani 1 1 d . . .
H16 H -0.6313 0.9150 0.2061 0.035 Uiso 1 1 calc R . .
C15 C -0.5967(3) 0.9849(2) 0.2894(2) 0.0313(9) Uani 1 1 d . . .
H15 H -0.6578 0.9806 0.3123 0.038 Uiso 1 1 calc R . .
C7 C -0.2746(2) 1.19061(16) 0.25423(17) 0.0160(7) Uani 1 1 d . . .
C42 C 0.1787(2) 0.68790(17) 0.05111(17) 0.0159(7) Uani 1 1 d . . .
C32 C 0.3048(3) 0.62289(19) 0.3412(2) 0.0300(9) Uani 1 1 d . . .
H32 H 0.2605 0.5963 0.3687 0.036 Uiso 1 1 calc R . .
C2 C -0.2647(2) 1.18321(18) 0.48028(18) 0.0204(7) Uani 1 1 d . . .
H2 H -0.2888 1.2239 0.4548 0.025 Uiso 1 1 calc R . .
C3 C -0.2316(3) 1.1891(2) 0.5541(2) 0.0280(8) Uani 1 1 d . . .
H3 H -0.2342 1.2334 0.5781 0.034 Uiso 1 1 calc R . .
C45 C 0.0200(3) 0.6300(2) -0.04087(19) 0.0263(8) Uani 1 1 d . . .
H45 H -0.0332 0.6107 -0.0707 0.032 Uiso 1 1 calc R . .
O7 O -0.1899(3) 0.85444(18) 0.0772(2) 0.0669(10) Uani 1 1 d U . .
C21 C -0.0820(2) 0.91070(16) 0.28066(18) 0.0164(7) Uani 1 1 d . . .
H21 H -0.1539 0.9027 0.2888 0.020 Uiso 1 1 calc R . .
C46 C 0.0258(3) 0.70356(19) -0.02907(19) 0.0233(8) Uani 1 1 d . . .
H46 H -0.0232 0.7338 -0.0514 0.028 Uiso 1 1 calc R . .
C31 C 0.2724(3) 0.64951(18) 0.2714(2) 0.0241(8) Uani 1 1 d . . .
H31 H 0.2068 0.6401 0.2522 0.029 Uiso 1 1 calc R . .
C48 C 0.4329(3) 0.62015(18) 0.01070(19) 0.0238(8) Uani 1 1 d . . .
H48A H 0.3791 0.6333 -0.0250 0.036 Uiso 1 1 calc R . .
H48B H 0.4479 0.5698 0.0058 0.036 Uiso 1 1 calc R . .
H48C H 0.4924 0.6480 0.0021 0.036 Uiso 1 1 calc R . .
C10 C -0.2269(3) 1.29758(19) 0.1535(2) 0.0299(9) Uani 1 1 d . . .
H10 H -0.2103 1.3328 0.1196 0.036 Uiso 1 1 calc R . .
C36 C 0.3925(2) 0.80488(17) 0.06831(18) 0.0176(7) Uani 1 1 d . . .
C30 C 0.3382(2) 0.69028(16) 0.23044(18) 0.0172(7) Uani 1 1 d . . .
C34 C 0.4690(3) 0.67551(19) 0.3288(2) 0.0303(9) Uani 1 1 d . . .
H34 H 0.5352 0.6837 0.3476 0.036 Uiso 1 1 calc R . .
C14 C -0.5217(2) 1.03102(18) 0.3192(2) 0.0238(8) Uani 1 1 d . . .
H14 H -0.5337 1.0580 0.3612 0.029 Uiso 1 1 calc R . .
C9 C -0.1850(3) 1.29980(19) 0.2252(2) 0.0300(9) Uani 1 1 d . . .
H9 H -0.1408 1.3368 0.2399 0.036 Uiso 1 1 calc R . .
C29 C 0.1305(2) 0.80719(16) 0.19518(17) 0.0134(6) Uani 1 1 d . . .
C39 C 0.5072(3) 0.89611(19) -0.0176(2) 0.0305(9) Uani 1 1 d . . .
H39 H 0.5452 0.9260 -0.0467 0.037 Uiso 1 1 calc R . .
C24 C 0.1114(2) 0.93944(16) 0.22964(17) 0.0138(6) Uani 1 1 d . . .
H24 H 0.1724 0.9509 0.2034 0.017 Uiso 1 1 calc R . .
O8 O 0.0861(3) 0.95094(19) 0.03461(18) 0.0623(9) Uani 1 1 d U . .
C5 C -0.1895(3) 1.06393(19) 0.5566(2) 0.0259(8) Uani 1 1 d . . .
H5 H -0.1633 1.0239 0.5822 0.031 Uiso 1 1 calc R . .
C6 C -0.2233(2) 1.05794(17) 0.48264(19) 0.0206(7) Uani 1 1 d . . .
H6 H -0.2198 1.0136 0.4588 0.025 Uiso 1 1 calc R . .
C44 C 0.0933(2) 0.58540(18) -0.0081(2) 0.0235(8) Uani 1 1 d . . .
H44 H 0.0904 0.5361 -0.0170 0.028 Uiso 1 1 calc R . .
C38 C 0.5520(3) 0.83643(19) 0.0171(2) 0.0281(8) Uani 1 1 d . . .
H38 H 0.6204 0.8267 0.0120 0.034 Uiso 1 1 calc R . .
C33 C 0.4033(3) 0.6361(2) 0.3697(2) 0.0323(9) Uani 1 1 d . . .
H33 H 0.4250 0.6183 0.4162 0.039 Uiso 1 1 calc R . .
C17 C -0.4896(3) 0.95203(19) 0.1927(2) 0.0299(9) Uani 1 1 d . . .
H17 H -0.4791 0.9264 0.1495 0.036 Uiso 1 1 calc R . .
C1 C -0.2626(2) 1.11749(17) 0.44334(17) 0.0153(7) Uani 1 1 d . . .
C18 C -0.4137(3) 0.99667(18) 0.22342(19) 0.0229(8) Uani 1 1 d . . .
H18 H -0.3519 0.9996 0.2014 0.027 Uiso 1 1 calc R . .
C11 C -0.2933(3) 1.2435(2) 0.1320(2) 0.0334(9) Uani 1 1 d . . .
H11 H -0.3225 1.2427 0.0837 0.040 Uiso 1 1 calc R . .
C13 C -0.4294(2) 1.03722(16) 0.28714(18) 0.0161(7) Uani 1 1 d . . .
C8 C -0.2088(2) 1.24667(18) 0.2755(2) 0.0247(8) Uani 1 1 d . . .
H8 H -0.1805 1.2485 0.3240 0.030 Uiso 1 1 calc R . .
C27 C 0.0368(3) 0.9475(2) 0.0849(2) 0.0363(10) Uani 1 1 d . . .
C35 C 0.4366(3) 0.70282(17) 0.26047(19) 0.0222(8) Uani 1 1 d . . .
H35 H 0.4810 0.7301 0.2338 0.027 Uiso 1 1 calc R . .
C26 C -0.1166(3) 1.01903(18) 0.13645(18) 0.0206(7) Uani 1 1 d . . .
C4 C -0.1948(3) 1.1297(2) 0.5922(2) 0.0330(9) Uani 1 1 d . . .
H4 H -0.1733 1.1336 0.6421 0.040 Uiso 1 1 calc R . .
C12 C -0.3169(3) 1.19004(18) 0.18183(19) 0.0255(8) Uani 1 1 d . . .
H12 H -0.3615 1.1534 0.1666 0.031 Uiso 1 1 calc R . .
C28 C -0.1304(3) 0.8863(2) 0.1135(2) 0.0410(11) Uani 1 1 d . . .
H1W H -0.489(3) 1.201(2) 0.341(2) 0.040(13) Uiso 1 1 d . . .
H2W H -0.462(3) 1.186(2) 0.408(3) 0.052(15) Uiso 1 1 d . . .
H1M H 0.444(3) 0.6257(18) 0.112(2) 0.014(10) Uiso 1 1 d . . .
 
loop_
 _atom_site_aniso_label
 _atom_site_aniso_U_11
 _atom_site_aniso_U_22
 _atom_site_aniso_U_33
 _atom_site_aniso_U_23
 _atom_site_aniso_U_13
 _atom_site_aniso_U_12
Sn2 0.01097(11) 0.01214(11) 0.01881(12) -0.00140(9) 0.00093(8) 0.00089(8)
Sn1 0.01115(11) 0.01443(11) 0.01416(11) -0.00155(9) 0.00006(8) 0.00126(8)
Cr1 0.0138(3) 0.0154(3) 0.0171(3) -0.0023(2) -0.0023(2) 0.0030(2)
O3 0.0142(11) 0.0143(11) 0.0228(12) -0.0053(10) 0.0018(9) 0.0000(9)
O6 0.0166(13) 0.0219(13) 0.0222(14) -0.0011(11) -0.0001(11) 0.0060(10)
O1 0.0163(13) 0.0304(14) 0.0185(14) -0.0019(12) 0.0013(11) 0.0092(11)
O4 0.0160(11) 0.0115(11) 0.0238(13) -0.0014(10) -0.0007(9) -0.0002(9)
O5 0.0139(11) 0.0141(11) 0.0232(12) -0.0027(10) 0.0034(9) 0.0029(9)
O2 0.0090(11) 0.0183(11) 0.0251(13) -0.0045(10) 0.0020(9) 0.0012(9)
O9 0.0347(15) 0.0338(15) 0.0276(14) 0.0012(12) -0.0039(12) 0.0177(13)
C20 0.0122(15) 0.0154(15) 0.0124(15) -0.0007(13) -0.0001(12) 0.0016(12)
C22 0.0152(16) 0.0128(15) 0.0196(17) -0.0001(14) -0.0010(13) -0.0010(13)
C25 0.0131(15) 0.0116(15) 0.0137(16) 0.0024(13) -0.0020(12) 0.0001(12)
C23 0.0113(15) 0.0140(15) 0.0148(16) 0.0007(13) -0.0023(12) 0.0021(12)
C19 0.0150(16) 0.0159(16) 0.0115(15) 0.0020(13) 0.0013(12) 0.0016(13)
C47 0.0191(17) 0.0199(17) 0.0191(17) 0.0020(14) 0.0063(14) -0.0006(14)
C41 0.0202(18) 0.0193(17) 0.0256(19) -0.0019(15) 0.0008(15) -0.0015(14)
C37 0.0182(17) 0.0207(17) 0.0274(19) -0.0027(15) 0.0020(15) -0.0002(14)
C43 0.0157(16) 0.0181(16) 0.0216(18) -0.0015(14) 0.0027(13) -0.0017(13)
C40 0.032(2) 0.0179(17) 0.0243(19) 0.0004(15) -0.0016(16) -0.0022(15)
C16 0.0180(18) 0.028(2) 0.041(2) -0.0045(18) -0.0052(16) -0.0065(15)
C15 0.0121(17) 0.039(2) 0.043(2) -0.0006(19) 0.0038(16) -0.0055(15)
C7 0.0146(16) 0.0169(16) 0.0171(17) 0.0016(14) 0.0048(13) 0.0039(13)
C42 0.0132(16) 0.0180(16) 0.0167(17) -0.0028(14) 0.0023(13) -0.0014(13)
C32 0.039(2) 0.0236(19) 0.029(2) 0.0050(16) 0.0146(17) 0.0142(16)
C2 0.0215(18) 0.0197(17) 0.0199(18) 0.0009(14) -0.0007(14) 0.0019(14)
C3 0.032(2) 0.0268(19) 0.0242(19) -0.0074(17) -0.0027(16) -0.0044(16)
C45 0.0184(18) 0.041(2) 0.0195(18) -0.0032(17) -0.0002(14) -0.0050(16)
O7 0.0718(17) 0.0524(15) 0.0710(17) -0.0034(14) -0.0410(15) -0.0113(14)
C21 0.0122(15) 0.0165(16) 0.0208(17) -0.0002(14) 0.0032(13) -0.0009(12)
C46 0.0197(18) 0.0300(19) 0.0199(18) 0.0052(16) -0.0005(14) 0.0015(15)
C31 0.0213(18) 0.0214(18) 0.030(2) -0.0007(16) 0.0046(15) 0.0067(14)
C48 0.0233(18) 0.0227(18) 0.0255(19) -0.0011(15) 0.0030(15) 0.0038(14)
C10 0.034(2) 0.0234(19) 0.034(2) 0.0106(17) 0.0201(17) 0.0133(16)
C36 0.0173(17) 0.0178(16) 0.0175(17) -0.0032(14) 0.0008(13) -0.0042(13)
C30 0.0208(17) 0.0135(15) 0.0173(17) -0.0024(14) 0.0019(13) 0.0060(13)
C34 0.032(2) 0.0248(19) 0.032(2) -0.0070(17) -0.0109(17) 0.0058(16)
C14 0.0204(18) 0.0272(18) 0.0240(19) -0.0046(16) 0.0026(15) 0.0001(15)
C9 0.0179(18) 0.0211(18) 0.051(3) 0.0066(18) 0.0039(17) 0.0010(15)
C29 0.0107(15) 0.0158(16) 0.0132(16) -0.0024(13) -0.0044(12) 0.0024(12)
C39 0.037(2) 0.026(2) 0.029(2) -0.0040(17) 0.0084(17) -0.0156(17)
C24 0.0124(15) 0.0155(15) 0.0131(16) 0.0010(13) -0.0013(12) 0.0001(12)
O8 0.0581(16) 0.0859(18) 0.0441(15) 0.0132(14) 0.0126(14) 0.0382(14)
C5 0.0270(19) 0.0250(19) 0.0250(19) 0.0098(16) -0.0040(15) -0.0016(15)
C6 0.0204(17) 0.0201(17) 0.0212(18) 0.0020(15) 0.0003(14) -0.0030(14)
C44 0.0217(18) 0.0198(17) 0.030(2) -0.0055(15) 0.0059(15) -0.0052(14)
C38 0.0178(18) 0.031(2) 0.036(2) -0.0091(17) 0.0090(16) -0.0060(15)
C33 0.049(3) 0.030(2) 0.0178(19) -0.0042(17) -0.0045(18) 0.0185(18)
C17 0.030(2) 0.028(2) 0.031(2) -0.0116(17) -0.0008(17) -0.0002(16)
C1 0.0108(15) 0.0194(16) 0.0157(16) 0.0010(14) 0.0000(13) -0.0006(12)
C18 0.0163(17) 0.0246(18) 0.028(2) -0.0058(16) 0.0038(15) -0.0006(14)
C11 0.055(3) 0.029(2) 0.0171(19) 0.0012(16) 0.0051(18) 0.0113(19)
C13 0.0112(15) 0.0165(16) 0.0202(17) 0.0022(14) -0.0027(13) -0.0002(12)
C8 0.0198(18) 0.0262(19) 0.028(2) 0.0021(16) -0.0042(15) 0.0008(14)
C27 0.032(2) 0.059(3) 0.0185(19) 0.0096(19) 0.0073(17) 0.029(2)
C35 0.0217(18) 0.0171(17) 0.0275(19) -0.0048(15) -0.0020(15) 0.0014(14)
C26 0.0220(18) 0.0223(18) 0.0177(17) -0.0055(15) 0.0031(14) -0.0005(15)
C4 0.039(2) 0.043(2) 0.0157(18) 0.0045(18) -0.0072(16) -0.0107(18)
C12 0.038(2) 0.0185(17) 0.0190(18) -0.0038(15) -0.0016(16) 0.0000(15)
C28 0.049(3) 0.0215(19) 0.048(3) -0.0008(19) -0.029(2) 0.0007(18)
 
_geom_special_details
;
 All esds (except the esd in the dihedral angle between two l.s. planes)
 are estimated using the full covariance matrix.  The cell esds are taken
 into account individually in the estimation of esds in distances, angles
 and torsion angles; correlations between esds in cell parameters are only
 used when they are defined by crystal symmetry.  An approximate (isotropic)
 treatment of cell esds is used for estimating esds involving l.s. planes.
;
 
loop_
 _geom_bond_atom_site_label_1
 _geom_bond_atom_site_label_2
 _geom_bond_distance
 _geom_bond_site_symmetry_2
 _geom_bond_publ_flag
Sn2 C30 2.124(3) . ?
Sn2 C36 2.135(3) . ?
Sn2 C42 2.135(3) . ?
Sn2 O5 2.164(2) . ?
Sn2 O6 2.441(2) . ?
Sn1 C7 2.119(3) . ?
Sn1 C1 2.125(3) . ?
Sn1 C13 2.135(3) . ?
Sn1 O2 2.142(2) . ?
Sn1 O1 2.348(2) . ?
Cr1 C28 1.839(4) . ?
Cr1 C27 1.845(4) . ?
Cr1 C26 1.869(3) . ?
Cr1 C24 2.184(3) . ?
Cr1 C23 2.190(3) . ?
Cr1 C20 2.200(3) . ?
Cr1 C22 2.200(3) . ?
Cr1 C21 2.212(3) . ?
Cr1 C25 2.229(3) . ?
O3 C19 1.233(4) . ?
O6 C48 1.436(4) . ?
O4 C29 1.236(4) . ?
O5 C29 1.292(4) . ?
O2 C19 1.284(4) . ?
O9 C26 1.134(4) . ?
C20 C21 1.410(4) . ?
C20 C25 1.414(4) . ?
C20 C19 1.510(4) . ?
C22 C21 1.400(4) . ?
C22 C23 1.409(4) . ?
C25 C24 1.399(4) . ?
C23 C24 1.425(4) . ?
C23 C29 1.494(4) . ?
C47 C46 1.390(5) . ?
C47 C42 1.397(4) . ?
C41 C40 1.388(5) . ?
C41 C36 1.404(5) . ?
C37 C38 1.388(5) . ?
C37 C36 1.392(4) . ?
C43 C44 1.391(5) . ?
C43 C42 1.398(4) . ?
C40 C39 1.380(5) . ?
C16 C15 1.381(5) . ?
C16 C17 1.384(5) . ?
C15 C14 1.391(5) . ?
C7 C12 1.388(5) . ?
C7 C8 1.394(5) . ?
C32 C33 1.390(5) . ?
C32 C31 1.394(5) . ?
C2 C3 1.380(5) . ?
C2 C1 1.391(4) . ?
C3 C4 1.373(5) . ?
C45 C44 1.379(5) . ?
C45 C46 1.384(5) . ?
O7 C28 1.155(5) . ?
C31 C30 1.396(5) . ?
C10 C11 1.373(5) . ?
C10 C9 1.375(5) . ?
C30 C35 1.396(4) . ?
C34 C35 1.376(5) . ?
C34 C33 1.380(6) . ?
C14 C13 1.383(5) . ?
C9 C8 1.388(5) . ?
C39 C38 1.387(5) . ?
O8 C27 1.149(5) . ?
C5 C4 1.382(5) . ?
C5 C6 1.384(5) . ?
C6 C1 1.396(4) . ?
C17 C18 1.389(5) . ?
C18 C13 1.399(5) . ?
C11 C12 1.387(5) . ?
 
loop_
 _geom_angle_atom_site_label_1
 _geom_angle_atom_site_label_2
 _geom_angle_atom_site_label_3
 _geom_angle
 _geom_angle_site_symmetry_1
 _geom_angle_site_symmetry_3
 _geom_angle_publ_flag
C30 Sn2 C36 121.62(12) . . ?
C30 Sn2 C42 123.34(12) . . ?
C36 Sn2 C42 112.89(12) . . ?
C30 Sn2 O5 97.07(10) . . ?
C36 Sn2 O5 89.62(11) . . ?
C42 Sn2 O5 97.59(10) . . ?
C30 Sn2 O6 81.76(10) . . ?
C36 Sn2 O6 87.93(10) . . ?
C42 Sn2 O6 86.06(10) . . ?
O5 Sn2 O6 176.18(8) . . ?
C7 Sn1 C1 119.32(12) . . ?
C7 Sn1 C13 114.34(12) . . ?
C1 Sn1 C13 124.76(12) . . ?
C7 Sn1 O2 99.54(10) . . ?
C1 Sn1 O2 94.95(10) . . ?
C13 Sn1 O2 88.23(10) . . ?
C7 Sn1 O1 86.40(11) . . ?
C1 Sn1 O1 82.66(11) . . ?
C13 Sn1 O1 88.65(11) . . ?
O2 Sn1 O1 174.01(9) . . ?
C28 Cr1 C27 88.1(2) . . ?
C28 Cr1 C26 84.93(15) . . ?
C27 Cr1 C26 90.41(15) . . ?
C28 Cr1 C24 144.96(15) . . ?
C27 Cr1 C24 85.13(15) . . ?
C26 Cr1 C24 129.36(13) . . ?
C28 Cr1 C23 108.69(14) . . ?
C27 Cr1 C23 94.06(14) . . ?
C26 Cr1 C23 165.77(13) . . ?
C24 Cr1 C23 38.01(11) . . ?
C28 Cr1 C20 129.18(18) . . ?
C27 Cr1 C20 142.37(16) . . ?
C26 Cr1 C20 88.20(13) . . ?
C24 Cr1 C20 67.32(11) . . ?
C23 Cr1 C20 80.01(11) . . ?
C28 Cr1 C22 89.57(15) . . ?
C27 Cr1 C22 126.38(14) . . ?
C26 Cr1 C22 142.63(13) . . ?
C24 Cr1 C22 67.67(11) . . ?
C23 Cr1 C22 37.45(11) . . ?
C20 Cr1 C22 67.11(11) . . ?
C28 Cr1 C21 98.37(17) . . ?
C27 Cr1 C21 161.43(14) . . ?
C26 Cr1 C21 107.44(13) . . ?
C24 Cr1 C21 79.61(12) . . ?
C23 Cr1 C21 67.39(12) . . ?
C20 Cr1 C21 37.27(11) . . ?
C22 Cr1 C21 37.01(11) . . ?
C28 Cr1 C25 165.26(17) . . ?
C27 Cr1 C25 106.21(16) . . ?
C26 Cr1 C25 98.35(13) . . ?
C24 Cr1 C25 36.94(11) . . ?
C23 Cr1 C25 67.43(11) . . ?
C20 Cr1 C25 37.23(11) . . ?
C22 Cr1 C25 79.08(11) . . ?
C21 Cr1 C25 66.92(11) . . ?
C48 O6 Sn2 127.3(2) . . ?
C29 O5 Sn2 114.00(18) . . ?
C19 O2 Sn1 121.61(19) . . ?
C21 C20 C25 120.2(3) . . ?
C21 C20 C19 119.2(3) . . ?
C25 C20 C19 120.6(3) . . ?
C21 C20 Cr1 71.83(18) . . ?
C25 C20 Cr1 72.50(17) . . ?
C19 C20 Cr1 127.4(2) . . ?
C21 C22 C23 120.7(3) . . ?
C21 C22 Cr1 71.95(18) . . ?
C23 C22 Cr1 70.89(17) . . ?
C24 C25 C20 119.5(3) . . ?
C24 C25 Cr1 69.81(17) . . ?
C20 C25 Cr1 70.27(17) . . ?
C22 C23 C24 118.9(3) . . ?
C22 C23 C29 119.4(3) . . ?
C24 C23 C29 121.7(3) . . ?
C22 C23 Cr1 71.66(17) . . ?
C24 C23 Cr1 70.78(17) . . ?
C29 C23 Cr1 128.5(2) . . ?
O3 C19 O2 125.1(3) . . ?
O3 C19 C20 120.7(3) . . ?
O2 C19 C20 114.2(3) . . ?
C46 C47 C42 121.0(3) . . ?
C40 C41 C36 120.7(3) . . ?
C38 C37 C36 121.1(3) . . ?
C44 C43 C42 120.9(3) . . ?
C39 C40 C41 120.2(3) . . ?
C15 C16 C17 119.5(3) . . ?
C16 C15 C14 120.3(3) . . ?
C12 C7 C8 118.2(3) . . ?
C12 C7 Sn1 119.9(2) . . ?
C8 C7 Sn1 121.9(2) . . ?
C47 C42 C43 117.9(3) . . ?
C47 C42 Sn2 120.2(2) . . ?
C43 C42 Sn2 121.9(2) . . ?
C33 C32 C31 120.0(4) . . ?
C3 C2 C1 121.2(3) . . ?
C4 C3 C2 120.0(3) . . ?
C44 C45 C46 119.7(3) . . ?
C22 C21 C20 119.9(3) . . ?
C22 C21 Cr1 71.04(18) . . ?
C20 C21 Cr1 70.90(18) . . ?
C45 C46 C47 120.1(3) . . ?
C32 C31 C30 120.2(3) . . ?
C11 C10 C9 120.1(3) . . ?
C37 C36 C41 118.1(3) . . ?
C37 C36 Sn2 123.5(2) . . ?
C41 C36 Sn2 118.3(2) . . ?
C35 C30 C31 118.6(3) . . ?
C35 C30 Sn2 118.5(2) . . ?
C31 C30 Sn2 122.9(2) . . ?
C35 C34 C33 120.1(3) . . ?
C13 C14 C15 120.9(3) . . ?
C10 C9 C8 119.9(3) . . ?
O4 C29 O5 123.7(3) . . ?
O4 C29 C23 119.9(3) . . ?
O5 C29 C23 116.4(3) . . ?
C40 C39 C38 119.9(3) . . ?
C25 C24 C23 120.6(3) . . ?
C25 C24 Cr1 73.25(17) . . ?
C23 C24 Cr1 71.21(17) . . ?
C4 C5 C6 119.7(3) . . ?
C5 C6 C1 120.9(3) . . ?
C45 C44 C43 120.4(3) . . ?
C39 C38 C37 120.0(3) . . ?
C34 C33 C32 120.0(3) . . ?
C16 C17 C18 120.2(3) . . ?
C2 C1 C6 118.0(3) . . ?
C2 C1 Sn1 121.0(2) . . ?
C6 C1 Sn1 121.0(2) . . ?
C17 C18 C13 120.7(3) . . ?
C10 C11 C12 120.3(4) . . ?
C14 C13 C18 118.4(3) . . ?
C14 C13 Sn1 122.2(2) . . ?
C18 C13 Sn1 119.4(2) . . ?
C9 C8 C7 120.9(3) . . ?
O8 C27 Cr1 177.1(3) . . ?
C34 C35 C30 121.1(3) . . ?
O9 C26 Cr1 177.8(3) . . ?
C3 C4 C5 120.3(3) . . ?
C11 C12 C7 120.7(3) . . ?
O7 C28 Cr1 177.4(4) . . ?
 
_diffrn_measured_fraction_theta_max    0.998
_diffrn_reflns_theta_full              25.50
_diffrn_measured_fraction_theta_full   0.998
_refine_diff_density_max    0.954
_refine_diff_density_min   -0.563
_refine_diff_density_rms    0.084
#===========end
data_complex8
 
_audit_creation_method            SHELXL-97
_chemical_name_systematic
;
 ?
;
_chemical_name_common             ?
_chemical_melting_point           ?
_chemical_formula_moiety          'C44 H40 Mn4 O22 Sn4'
_chemical_formula_sum
 'C44 H40 Mn4 O22 Sn4'
_chemical_formula_weight          1615.36
 
loop_
 _atom_type_symbol
 _atom_type_description
 _atom_type_scat_dispersion_real
 _atom_type_scat_dispersion_imag
 _atom_type_scat_source
 'C'  'C'   0.0033   0.0016
 'International Tables Vol C Tables 4.2.6.8 and 6.1.1.4'
 'H'  'H'   0.0000   0.0000
 'International Tables Vol C Tables 4.2.6.8 and 6.1.1.4'
 'O'  'O'   0.0106   0.0060
 'International Tables Vol C Tables 4.2.6.8 and 6.1.1.4'
 'Mn'  'Mn'   0.3368   0.7283
 'International Tables Vol C Tables 4.2.6.8 and 6.1.1.4'
 'Sn'  'Sn'  -0.6537   1.4246
 'International Tables Vol C Tables 4.2.6.8 and 6.1.1.4'
 
_symmetry_cell_setting            'triclinic'
_symmetry_space_group_name_H-M          'P -1'
_symmetry_space_group_name_Hall '-P 1 '
 
loop_
 _symmetry_equiv_pos_as_xyz
 'x, y, z'
 '-x, -y, -z'
 
_cell_length_a                    9.836(5)
_cell_length_b                    10.743(5)
_cell_length_c                    14.063(5)
_cell_angle_alpha                 109.941(5)
_cell_angle_beta                  100.146(5)
_cell_angle_gamma                 96.279(5)
_cell_volume                      1351.8(10)
_cell_formula_units_Z             1
_cell_measurement_temperature     100(2)
_cell_measurement_reflns_used     7818
_cell_measurement_theta_min       2.68
_cell_measurement_theta_max       28.32
 
_exptl_crystal_description        'block'
_exptl_crystal_colour             'brown'
_exptl_crystal_size_max           0.14
_exptl_crystal_size_mid           0.13
_exptl_crystal_size_min           0.11
_exptl_crystal_density_meas       ?
_exptl_crystal_density_diffrn           1.984
_exptl_crystal_density_method     'not measured'
_exptl_crystal_F_000              780.0
_exptl_absorpt_coefficient_mu     2.794
_exptl_absorpt_correction_type   'empirical'
_exptl_absorpt_correction_T_min   0.686
_exptl_absorpt_correction_T_max   0.738
_exptl_absorpt_process_details    'sadabs'
 
_exptl_special_details
;
 ?
;
 
_diffrn_ambient_temperature       100(2)
_diffrn_radiation_wavelength      0.71073
_diffrn_radiation_type            MoK\a
_diffrn_radiation_source          'fine-focus sealed tube'
_diffrn_radiation_monochromator   graphite
_diffrn_measurement_device_type   'Bruker APEX-II CCD'
_diffrn_measurement_method        '\f and \w scans'
_diffrn_detector_area_resol_mean  ?
_diffrn_standards_number          ?
_diffrn_standards_interval_count  ?
_diffrn_standards_interval_time   ?
_diffrn_standards_decay_%         ?
_diffrn_reflns_number             9680
_diffrn_reflns_av_R_equivalents   0.0219
_diffrn_reflns_av_sigmaI/netI     0.0325
_diffrn_reflns_limit_h_min        -11
_diffrn_reflns_limit_h_max        8
_diffrn_reflns_limit_k_min        -13
_diffrn_reflns_limit_k_max        13
_diffrn_reflns_limit_l_min        -14
_diffrn_reflns_limit_l_max        17
_diffrn_reflns_theta_min          2.05
_diffrn_reflns_theta_max          25.50
_reflns_number_total              5001
_reflns_number_gt                 4541
_reflns_threshold_expression      >2sigma(I)
 
_computing_data_collection      'Bruker APEX2'
_computing_cell_refinement      'Bruker SAINT'
_computing_data_reduction       'Bruker SAINT'
_computing_structure_solution   'SHELXS-97 (Sheldrick, 2008)'
_computing_structure_refinement 'SHELXL-97 (Sheldrick, 2008)'
_computing_molecular_graphics   'Bruker SHELXTL'
_computing_publication_material 'Bruker SHELXTL'
 
 
_refine_special_details
;
 Refinement of F^2^ against ALL reflections.  The weighted R-factor wR and
 goodness of fit S are based on F^2^, conventional R-factors R are based
 on F, with F set to zero for negative F^2^. The threshold expression of
 F^2^ > 2sigma(F^2^) is used only for calculating R-factors(gt) etc. and is
 not relevant to the choice of reflections for refinement.  R-factors based
 on F^2^ are statistically about twice as large as those based on F, and R-
 factors based on ALL data will be even larger.
;
 
_refine_ls_structure_factor_coef  Fsqd
_refine_ls_matrix_type            full
_refine_ls_weighting_scheme       calc
_refine_ls_weighting_details
 'calc w=1/[\s^2^(Fo^2^)+(0.0201P)^2^+0.9037P] where P=(Fo^2^+2Fc^2^)/3'
_atom_sites_solution_primary      direct
_atom_sites_solution_secondary    difmap
_atom_sites_solution_hydrogens    geom
_refine_ls_hydrogen_treatment     mixed
_refine_ls_extinction_method      none
_refine_ls_extinction_coef        ?
_refine_ls_number_reflns          5001
_refine_ls_number_parameters      338
_refine_ls_number_restraints      0
_refine_ls_R_factor_all           0.0267
_refine_ls_R_factor_gt            0.0224
_refine_ls_wR_factor_ref          0.0540
_refine_ls_wR_factor_gt           0.0525
_refine_ls_goodness_of_fit_ref    1.091
_refine_ls_restrained_S_all       1.091
_refine_ls_shift/su_max           0.001
_refine_ls_shift/su_mean          0.000
 
loop_
 _atom_site_label
 _atom_site_type_symbol
 _atom_site_fract_x
 _atom_site_fract_y
 _atom_site_fract_z
 _atom_site_U_iso_or_equiv
 _atom_site_adp_type
 _atom_site_occupancy
 _atom_site_symmetry_multiplicity
 _atom_site_calc_flag
 _atom_site_refinement_flags
 _atom_site_disorder_assembly
 _atom_site_disorder_group
Sn01 Sn 0.55789(2) 0.370620(18) 0.519367(14) 0.01226(6) Uani 1 1 d . . .
Sn02 Sn 0.42247(2) 0.606268(18) 0.731505(13) 0.01215(6) Uani 1 1 d . . .
Mn03 Mn 0.76564(5) 0.31349(4) 0.91655(3) 0.01420(10) Uani 1 1 d . . .
Mn04 Mn 0.07617(5) 0.98279(4) 0.67908(3) 0.01483(10) Uani 1 1 d . . .
O3 O -0.1556(2) 1.1009(2) 0.60443(16) 0.0246(5) Uani 1 1 d . . .
O4 O 0.3696(2) 0.76488(19) 0.67514(14) 0.0166(4) Uani 1 1 d . . .
O6 O 0.5707(2) 0.3014(2) 0.65366(15) 0.0242(5) Uani 1 1 d . . .
O7 O 0.4679(2) 0.4270(2) 0.77108(16) 0.0239(5) Uani 1 1 d . . .
C11 C 0.2122(3) 0.5346(3) 0.7262(3) 0.0236(7) Uani 1 1 d . . .
H11A H 0.1544 0.5956 0.7123 0.035 Uiso 1 1 calc R . .
H11B H 0.2056 0.5282 0.7917 0.035 Uiso 1 1 calc R . .
H11C H 0.1809 0.4472 0.6721 0.035 Uiso 1 1 calc R . .
C22 C 0.8864(3) 0.3507(3) 0.8434(2) 0.0192(6) Uani 1 1 d . . .
O11 O 0.9601(2) 0.3742(2) 0.79468(17) 0.0272(5) Uani 1 1 d . . .
O9 O 0.7704(3) 0.6011(2) 1.02800(17) 0.0310(6) Uani 1 1 d . . .
C21 C 0.7726(3) 0.4884(3) 0.9856(2) 0.0203(7) Uani 1 1 d . . .
O5 O 0.3443(2) 0.8469(2) 0.83739(15) 0.0244(5) Uani 1 1 d . . .
C3 C 0.2539(3) 1.0840(3) 0.8038(2) 0.0179(6) Uani 1 1 d . . .
H3 H 0.2586 1.0992 0.8772 0.021 Uiso 1 1 calc R . .
O2 O -0.0739(3) 0.9143(3) 0.8232(2) 0.0453(7) Uani 1 1 d . . .
O10 O 0.9907(3) 0.2938(3) 1.07695(19) 0.0390(6) Uani 1 1 d . . .
C13 C 0.3940(3) 0.2035(3) 0.4379(2) 0.0220(7) Uani 1 1 d . . .
H13A H 0.3125 0.2185 0.4661 0.033 Uiso 1 1 calc R . .
H13B H 0.4233 0.1240 0.4447 0.033 Uiso 1 1 calc R . .
H13C H 0.3714 0.1919 0.3658 0.033 Uiso 1 1 calc R . .
O8 O 0.4686(2) 0.52949(19) 0.59055(14) 0.0148(4) Uani 1 1 d . . .
O1 O -0.0411(3) 0.7159(2) 0.5170(2) 0.0405(6) Uani 1 1 d . . .
C15 C 0.5721(3) 0.2574(3) 0.8058(2) 0.0147(6) Uani 1 1 d . . .
C8 C -0.0658(3) 1.0528(3) 0.6332(2) 0.0179(6) Uani 1 1 d . . .
C2 C 0.2897(3) 0.9713(3) 0.7307(2) 0.0142(6) Uani 1 1 d . . .
C14 C 0.5348(3) 0.3349(3) 0.7383(2) 0.0153(6) Uani 1 1 d . . .
C19 C 0.5451(3) 0.2799(3) 0.9058(2) 0.0165(6) Uani 1 1 d . . .
H19 H 0.4920 0.3464 0.9412 0.020 Uiso 1 1 calc R . .
C18 C 0.6032(3) 0.1875(3) 0.9436(2) 0.0202(7) Uani 1 1 d . . .
H18 H 0.5988 0.1788 1.0102 0.024 Uiso 1 1 calc R . .
C4 C 0.2155(3) 1.1726(3) 0.7537(2) 0.0199(6) Uani 1 1 d . . .
H4 H 0.1887 1.2598 0.7859 0.024 Uiso 1 1 calc R . .
C5 C 0.2282(3) 1.1155(3) 0.6496(2) 0.0191(6) Uani 1 1 d . . .
H5 H 0.2104 1.1562 0.5970 0.023 Uiso 1 1 calc R . .
C20 C 0.9042(3) 0.3016(3) 1.0144(2) 0.0239(7) Uani 1 1 d . . .
C10 C 0.6136(3) 0.7134(3) 0.8370(2) 0.0243(7) Uani 1 1 d . . .
H10A H 0.6881 0.6658 0.8188 0.036 Uiso 1 1 calc R . .
H10B H 0.6066 0.7217 0.9061 0.036 Uiso 1 1 calc R . .
H10C H 0.6333 0.8014 0.8343 0.036 Uiso 1 1 calc R . .
C16 C 0.6466(3) 0.1484(3) 0.7817(2) 0.0164(6) Uani 1 1 d . . .
H16 H 0.6763 0.1083 0.7167 0.020 Uiso 1 1 calc R . .
C6 C 0.2741(3) 0.9924(3) 0.6351(2) 0.0158(6) Uani 1 1 d . . .
H6 H 0.2940 0.9325 0.5709 0.019 Uiso 1 1 calc R . .
C7 C 0.0060(3) 0.8190(3) 0.5798(3) 0.0256(7) Uani 1 1 d . . .
C17 C 0.6665(3) 0.1060(3) 0.8667(2) 0.0195(6) Uani 1 1 d . . .
H17 H 0.7135 0.0318 0.8715 0.023 Uiso 1 1 calc R . .
C9 C -0.0158(3) 0.9403(3) 0.7667(3) 0.0259(7) Uani 1 1 d . . .
C12 C 0.7783(3) 0.4257(3) 0.5659(2) 0.0223(7) Uani 1 1 d . . .
H12A H 0.8143 0.4427 0.5115 0.033 Uiso 1 1 calc R . .
H12B H 0.8172 0.3539 0.5799 0.033 Uiso 1 1 calc R . .
H12C H 0.8038 0.5057 0.6277 0.033 Uiso 1 1 calc R . .
C1 C 0.3370(3) 0.8549(3) 0.7512(2) 0.0160(6) Uani 1 1 d . . .
 
loop_
 _atom_site_aniso_label
 _atom_site_aniso_U_11
 _atom_site_aniso_U_22
 _atom_site_aniso_U_33
 _atom_site_aniso_U_23
 _atom_site_aniso_U_13
 _atom_site_aniso_U_12
Sn01 0.01346(11) 0.01348(11) 0.01350(10) 0.00726(8) 0.00540(7) 0.00612(8)
Sn02 0.01332(11) 0.01442(11) 0.01251(10) 0.00737(8) 0.00583(7) 0.00541(8)
Mn03 0.0129(2) 0.0167(2) 0.0145(2) 0.00732(18) 0.00273(17) 0.00418(17)
Mn04 0.0125(2) 0.0144(2) 0.0186(2) 0.00638(18) 0.00431(17) 0.00446(17)
O3 0.0227(13) 0.0320(13) 0.0211(11) 0.0105(10) 0.0040(9) 0.0121(10)
O4 0.0208(12) 0.0166(10) 0.0170(10) 0.0085(8) 0.0080(8) 0.0086(9)
O6 0.0366(14) 0.0276(12) 0.0182(11) 0.0152(9) 0.0113(9) 0.0154(10)
O7 0.0284(13) 0.0255(12) 0.0301(12) 0.0194(10) 0.0139(10) 0.0139(10)
C11 0.0176(17) 0.0234(17) 0.0321(18) 0.0113(14) 0.0104(13) 0.0018(13)
C22 0.0153(17) 0.0172(15) 0.0208(15) 0.0044(12) -0.0009(12) 0.0018(12)
O11 0.0215(13) 0.0305(13) 0.0300(12) 0.0105(10) 0.0108(10) 0.0003(10)
O9 0.0342(15) 0.0241(13) 0.0278(12) 0.0023(10) 0.0025(10) 0.0085(11)
C21 0.0172(17) 0.0263(18) 0.0175(15) 0.0086(13) 0.0020(12) 0.0059(13)
O5 0.0345(14) 0.0275(12) 0.0175(11) 0.0129(9) 0.0078(9) 0.0135(10)
C3 0.0141(16) 0.0182(15) 0.0178(15) 0.0042(12) 0.0010(11) 0.0006(12)
O2 0.0364(17) 0.0674(19) 0.0620(18) 0.0481(16) 0.0293(14) 0.0218(14)
O10 0.0305(15) 0.0483(16) 0.0394(14) 0.0252(13) -0.0077(11) 0.0084(12)
C13 0.0215(18) 0.0204(16) 0.0221(16) 0.0058(13) 0.0082(13) -0.0023(13)
O8 0.0187(11) 0.0187(10) 0.0132(10) 0.0091(8) 0.0081(8) 0.0101(8)
O1 0.0248(15) 0.0241(14) 0.0532(16) -0.0076(12) 0.0064(12) 0.0011(11)
C15 0.0111(15) 0.0163(14) 0.0171(14) 0.0089(12) 0.0004(11) -0.0001(11)
C8 0.0174(17) 0.0202(16) 0.0154(14) 0.0039(12) 0.0075(12) 0.0040(13)
C2 0.0100(15) 0.0148(14) 0.0178(14) 0.0062(12) 0.0028(11) 0.0029(11)
C14 0.0114(15) 0.0155(15) 0.0189(15) 0.0081(12) 0.0016(11) -0.0010(12)
C19 0.0105(15) 0.0219(16) 0.0204(15) 0.0098(12) 0.0064(11) 0.0054(12)
C18 0.0191(17) 0.0274(17) 0.0193(15) 0.0157(13) 0.0045(12) 0.0018(13)
C4 0.0137(16) 0.0141(15) 0.0284(17) 0.0048(13) 0.0028(12) 0.0015(12)
C5 0.0145(16) 0.0181(15) 0.0288(16) 0.0146(13) 0.0036(12) 0.0024(12)
C20 0.0219(18) 0.0252(17) 0.0252(17) 0.0118(14) 0.0033(14) 0.0026(14)
C10 0.0192(18) 0.0273(18) 0.0243(16) 0.0101(14) -0.0001(13) 0.0018(13)
C16 0.0149(16) 0.0146(15) 0.0163(14) 0.0028(12) 0.0032(11) -0.0010(12)
C6 0.0121(15) 0.0171(15) 0.0195(15) 0.0080(12) 0.0037(11) 0.0037(12)
C7 0.0124(17) 0.0252(18) 0.0378(19) 0.0089(16) 0.0056(14) 0.0065(14)
C17 0.0178(17) 0.0144(15) 0.0283(16) 0.0121(13) 0.0012(12) 0.0029(12)
C9 0.0205(18) 0.0302(19) 0.0343(18) 0.0182(15) 0.0083(14) 0.0109(14)
C12 0.0148(17) 0.0269(17) 0.0248(16) 0.0101(14) 0.0023(12) 0.0043(13)
C1 0.0128(16) 0.0177(15) 0.0173(15) 0.0070(12) 0.0023(11) 0.0022(12)
 
_geom_special_details
;
 All esds (except the esd in the dihedral angle between two l.s. planes)
 are estimated using the full covariance matrix.  The cell esds are taken
 into account individually in the estimation of esds in distances, angles
 and torsion angles; correlations between esds in cell parameters are only
 used when they are defined by crystal symmetry.  An approximate (isotropic)
 treatment of cell esds is used for estimating esds involving l.s. planes.
;
 
loop_
 _geom_bond_atom_site_label_1
 _geom_bond_atom_site_label_2
 _geom_bond_distance
 _geom_bond_site_symmetry_2
 _geom_bond_publ_flag
Sn01 O8 2.039(2) . ?
Sn01 C12 2.106(3) . ?
Sn01 C13 2.109(3) . ?
Sn01 O8 2.1586(19) 2_666 ?
Sn01 O6 2.243(2) . ?
Sn01 Sn01 3.2905(13) 2_666 ?
Sn02 O8 2.0248(19) . ?
Sn02 C11 2.105(3) . ?
Sn02 C10 2.107(3) . ?
Sn02 O4 2.184(2) . ?
Sn02 O7 2.247(2) . ?
Mn03 C21 1.784(3) . ?
Mn03 C22 1.799(3) . ?
Mn03 C20 1.807(3) . ?
Mn03 C15 2.116(3) . ?
Mn03 C19 2.130(3) . ?
Mn03 C16 2.140(3) . ?
Mn03 C18 2.150(3) . ?
Mn03 C17 2.152(3) . ?
Mn04 C8 1.782(3) . ?
Mn04 C9 1.797(3) . ?
Mn04 C7 1.800(3) . ?
Mn04 C3 2.126(3) . ?
Mn04 C2 2.129(3) . ?
Mn04 C4 2.135(3) . ?
Mn04 C5 2.144(3) . ?
Mn04 C6 2.146(3) . ?
O3 C8 1.152(4) . ?
O4 C1 1.291(4) . ?
O6 C14 1.247(4) . ?
O7 C14 1.250(4) . ?
C22 O11 1.145(4) . ?
O9 C21 1.157(4) . ?
O5 C1 1.235(3) . ?
C3 C4 1.409(4) . ?
C3 C2 1.421(4) . ?
O2 C9 1.146(4) . ?
O10 C20 1.143(4) . ?
O8 Sn01 2.1586(19) 2_666 ?
O1 C7 1.139(4) . ?
C15 C19 1.421(4) . ?
C15 C16 1.423(4) . ?
C15 C14 1.488(4) . ?
C2 C6 1.422(4) . ?
C2 C1 1.479(4) . ?
C19 C18 1.405(4) . ?
C18 C17 1.426(4) . ?
C4 C5 1.416(4) . ?
C5 C6 1.406(4) . ?
C16 C17 1.409(4) . ?
 
loop_
 _geom_angle_atom_site_label_1
 _geom_angle_atom_site_label_2
 _geom_angle_atom_site_label_3
 _geom_angle
 _geom_angle_site_symmetry_1
 _geom_angle_site_symmetry_3
 _geom_angle_publ_flag
O8 Sn01 C12 109.73(11) . . ?
O8 Sn01 C13 107.32(11) . . ?
C12 Sn01 C13 142.48(13) . . ?
O8 Sn01 O8 76.80(8) . 2_666 ?
C12 Sn01 O8 96.16(10) . 2_666 ?
C13 Sn01 O8 97.78(10) . 2_666 ?
O8 Sn01 O6 92.00(8) . . ?
C12 Sn01 O6 86.51(10) . . ?
C13 Sn01 O6 86.49(10) . . ?
O8 Sn01 O6 168.74(7) 2_666 . ?
O8 Sn01 Sn01 39.69(5) . 2_666 ?
C12 Sn01 Sn01 106.23(9) . 2_666 ?
C13 Sn01 Sn01 105.86(9) . 2_666 ?
O8 Sn01 Sn01 37.11(5) 2_666 2_666 ?
O6 Sn01 Sn01 131.68(6) . 2_666 ?
O8 Sn02 C11 111.49(11) . . ?
O8 Sn02 C10 106.21(11) . . ?
C11 Sn02 C10 141.71(13) . . ?
O8 Sn02 O4 82.08(7) . . ?
C11 Sn02 O4 93.71(11) . . ?
C10 Sn02 O4 97.88(10) . . ?
O8 Sn02 O7 92.64(8) . . ?
C11 Sn02 O7 84.84(11) . . ?
C10 Sn02 O7 87.03(11) . . ?
O4 Sn02 O7 173.61(8) . . ?
C21 Mn03 C22 91.39(14) . . ?
C21 Mn03 C20 93.18(14) . . ?
C22 Mn03 C20 92.89(15) . . ?
C21 Mn03 C15 102.82(12) . . ?
C22 Mn03 C15 101.47(12) . . ?
C20 Mn03 C15 158.09(13) . . ?
C21 Mn03 C19 89.02(13) . . ?
C22 Mn03 C19 138.99(12) . . ?
C20 Mn03 C19 128.04(13) . . ?
C15 Mn03 C19 39.11(11) . . ?
C21 Mn03 C16 141.15(12) . . ?
C22 Mn03 C16 90.70(13) . . ?
C20 Mn03 C16 125.44(13) . . ?
C15 Mn03 C16 39.07(11) . . ?
C19 Mn03 C16 65.09(12) . . ?
C21 Mn03 C18 112.56(14) . . ?
C22 Mn03 C18 154.15(13) . . ?
C20 Mn03 C18 95.23(13) . . ?
C15 Mn03 C18 64.95(11) . . ?
C19 Mn03 C18 38.33(11) . . ?
C16 Mn03 C18 64.71(11) . . ?
C21 Mn03 C17 150.96(14) . . ?
C22 Mn03 C17 116.28(13) . . ?
C20 Mn03 C17 93.98(13) . . ?
C15 Mn03 C17 64.88(11) . . ?
C19 Mn03 C17 64.62(12) . . ?
C16 Mn03 C17 38.33(11) . . ?
C18 Mn03 C17 38.71(12) . . ?
C8 Mn04 C9 91.54(14) . . ?
C8 Mn04 C7 92.17(14) . . ?
C9 Mn04 C7 90.95(16) . . ?
C8 Mn04 C3 127.63(13) . . ?
C9 Mn04 C3 90.07(14) . . ?
C7 Mn04 C3 140.14(13) . . ?
C8 Mn04 C2 156.58(13) . . ?
C9 Mn04 C2 105.64(13) . . ?
C7 Mn04 C2 103.12(13) . . ?
C3 Mn04 C2 39.02(11) . . ?
C8 Mn04 C4 94.00(13) . . ?
C9 Mn04 C4 111.88(14) . . ?
C7 Mn04 C4 156.14(14) . . ?
C3 Mn04 C4 38.63(11) . . ?
C2 Mn04 C4 65.09(11) . . ?
C8 Mn04 C5 92.47(13) . . ?
C9 Mn04 C5 150.47(14) . . ?
C7 Mn04 C5 118.10(14) . . ?
C3 Mn04 C5 64.64(12) . . ?
C2 Mn04 C5 64.75(11) . . ?
C4 Mn04 C5 38.64(12) . . ?
C8 Mn04 C6 123.96(12) . . ?
C9 Mn04 C6 144.05(13) . . ?
C7 Mn04 C6 92.93(13) . . ?
C3 Mn04 C6 64.89(12) . . ?
C2 Mn04 C6 38.86(11) . . ?
C4 Mn04 C6 64.65(12) . . ?
C5 Mn04 C6 38.25(11) . . ?
C1 O4 Sn02 105.97(16) . . ?
C14 O6 Sn01 137.56(19) . . ?
C14 O7 Sn02 135.04(19) . . ?
O11 C22 Mn03 178.1(3) . . ?
O9 C21 Mn03 176.7(3) . . ?
C4 C3 C2 108.3(3) . . ?
C4 C3 Mn04 71.05(17) . . ?
C2 C3 Mn04 70.63(16) . . ?
Sn02 O8 Sn01 134.74(9) . . ?
Sn02 O8 Sn01 121.86(9) . 2_666 ?
Sn01 O8 Sn01 103.20(8) . 2_666 ?
C19 C15 C16 107.8(2) . . ?
C19 C15 C14 127.1(3) . . ?
C16 C15 C14 125.1(3) . . ?
C19 C15 Mn03 70.99(16) . . ?
C16 C15 Mn03 71.41(16) . . ?
C14 C15 Mn03 121.68(19) . . ?
O3 C8 Mn04 178.4(3) . . ?
C3 C2 C6 107.4(2) . . ?
C3 C2 C1 126.1(3) . . ?
C6 C2 C1 126.5(3) . . ?
C3 C2 Mn04 70.34(17) . . ?
C6 C2 Mn04 71.20(16) . . ?
C1 C2 Mn04 124.6(2) . . ?
O6 C14 O7 125.7(3) . . ?
O6 C14 C15 117.5(3) . . ?
O7 C14 C15 116.8(3) . . ?
C18 C19 C15 108.3(3) . . ?
C18 C19 Mn03 71.62(18) . . ?
C15 C19 Mn03 69.91(16) . . ?
C19 C18 C17 107.9(2) . . ?
C19 C18 Mn03 70.05(17) . . ?
C17 C18 Mn03 70.70(17) . . ?
C3 C4 C5 107.8(3) . . ?
C3 C4 Mn04 70.32(17) . . ?
C5 C4 Mn04 71.03(17) . . ?
C6 C5 C4 108.4(2) . . ?
C6 C5 Mn04 70.94(17) . . ?
C4 C5 Mn04 70.33(17) . . ?
O10 C20 Mn03 179.2(3) . . ?
C17 C16 C15 107.9(3) . . ?
C17 C16 Mn03 71.27(17) . . ?
C15 C16 Mn03 69.53(16) . . ?
C5 C6 C2 108.0(3) . . ?
C5 C6 Mn04 70.81(17) . . ?
C2 C6 Mn04 69.94(16) . . ?
O1 C7 Mn04 178.6(3) . . ?
C16 C17 C18 108.2(3) . . ?
C16 C17 Mn03 70.40(16) . . ?
C18 C17 Mn03 70.59(17) . . ?
O2 C9 Mn04 179.4(4) . . ?
O5 C1 O4 122.9(3) . . ?
O5 C1 C2 120.5(3) . . ?
O4 C1 C2 116.6(2) . . ?
 
_diffrn_measured_fraction_theta_max    0.996
_diffrn_reflns_theta_full              25.50
_diffrn_measured_fraction_theta_full   0.996
_refine_diff_density_max    0.514
_refine_diff_density_min   -0.717
_refine_diff_density_rms    0.111
#===============end
data_complex9
 
_audit_creation_method            SHELXL-97
_chemical_name_systematic
;
 ?
;
_chemical_name_common             ?
_chemical_melting_point           ?
_chemical_formula_moiety          'C34 H46 Mn2 O16 Sn4'
_chemical_formula_sum
 'C34 H46 Mn2 O16 Sn4'
_chemical_formula_weight         1295.43
 
loop_
 _atom_type_symbol
 _atom_type_description
 _atom_type_scat_dispersion_real
 _atom_type_scat_dispersion_imag
 _atom_type_scat_source
 'C'  'C'   0.0033   0.0016
 'International Tables Vol C Tables 4.2.6.8 and 6.1.1.4'
 'H'  'H'   0.0000   0.0000
 'International Tables Vol C Tables 4.2.6.8 and 6.1.1.4'
 'O'  'O'   0.0106   0.0060
 'International Tables Vol C Tables 4.2.6.8 and 6.1.1.4'
 'Mn'  'Mn'   0.3368   0.7283
 'International Tables Vol C Tables 4.2.6.8 and 6.1.1.4'
 'Sn'  'Sn'  -0.6537   1.4246
 'International Tables Vol C Tables 4.2.6.8 and 6.1.1.4'
 
_symmetry_cell_setting            'triclinic'
_symmetry_space_group_name_H-M    'P -1'
_symmetry_space_group_name_Hall '-P 1'
 
loop_
 _symmetry_equiv_pos_as_xyz
 'x, y, z'
 '-x, -y, -z'
 
_cell_length_a                    7.073(5)
_cell_length_b                    10.244(5)
_cell_length_c                    16.376(5)
_cell_angle_alpha                 98.435(5)
_cell_angle_beta                  91.365(5)
_cell_angle_gamma                 93.543(5)
_cell_volume                      1170.8(11)
_cell_formula_units_Z             1
_cell_measurement_temperature     100(2)
_cell_measurement_reflns_used     5064
_cell_measurement_theta_min       2.52
_cell_measurement_theta_max       26.84
 
_exptl_crystal_description        'bolck'
_exptl_crystal_colour             'brown'
_exptl_crystal_size_max           0.14
_exptl_crystal_size_mid           0.12
_exptl_crystal_size_min           0.09
_exptl_crystal_density_meas       ?
_exptl_crystal_density_diffrn     1.837
_exptl_crystal_density_method     'not measured'
_exptl_crystal_F_000               628.0
_exptl_absorpt_coefficient_mu     2.684
_exptl_absorpt_correction_type    'empirical'
_exptl_absorpt_correction_T_min    0.642
_exptl_absorpt_correction_T_max   0.747
_exptl_absorpt_process_details    'sadabs'
 
_exptl_special_details
;
 ?
;
 
_diffrn_ambient_temperature       100(2)
_diffrn_radiation_wavelength      0.71069
_diffrn_radiation_type            MoK\a
_diffrn_radiation_source          'fine-focus sealed tube'
_diffrn_radiation_monochromator   graphite
_diffrn_measurement_device_type   'Bruker APEX-II CCD'
_diffrn_measurement_method        '\f and \w scans'
_diffrn_detector_area_resol_mean  ?
_diffrn_standards_number          ?
_diffrn_standards_interval_count  ?
_diffrn_standards_interval_time   ?
_diffrn_standards_decay_%         ?
_diffrn_reflns_number             11339
_diffrn_reflns_av_R_equivalents   0.0324
_diffrn_reflns_av_sigmaI/netI     0.0408
_diffrn_reflns_limit_h_min        -8
_diffrn_reflns_limit_h_max        8
_diffrn_reflns_limit_k_min        -12
_diffrn_reflns_limit_k_max        12
_diffrn_reflns_limit_l_min        -19
_diffrn_reflns_limit_l_max        19
_diffrn_reflns_theta_min          2.21
_diffrn_reflns_theta_max          25.50
_reflns_number_total              4367
_reflns_number_gt                 3357
_reflns_threshold_expression      >2sigma(I)
 
_computing_data_collection      'Bruker APEX2'
_computing_cell_refinement      'Bruker SAINT'
_computing_data_reduction       'Bruker SAINT'
_computing_structure_solution   'SHELXS-97 (Sheldrick, 2008)'
_computing_structure_refinement 'SHELXL-97 (Sheldrick, 2008)'
_computing_molecular_graphics   'Bruker SHELXTL'
_computing_publication_material 'Bruker SHELXTL'
 
 
_refine_special_details
;
 Refinement of F^2^ against ALL reflections.  The weighted R-factor wR and
 goodness of fit S are based on F^2^, conventional R-factors R are based
 on F, with F set to zero for negative F^2^. The threshold expression of
 F^2^ > 2sigma(F^2^) is used only for calculating R-factors(gt) etc. and is
 not relevant to the choice of reflections for refinement.  R-factors based
 on F^2^ are statistically about twice as large as those based on F, and R-
 factors based on ALL data will be even larger.
;
 
_refine_ls_structure_factor_coef  Fsqd
_refine_ls_matrix_type            full
_refine_ls_weighting_scheme       calc
_refine_ls_weighting_details
 'calc w=1/[\s^2^(Fo^2^)+(0.0305P)^2^+0.0000P] where P=(Fo^2^+2Fc^2^)/3'
_atom_sites_solution_primary      direct
_atom_sites_solution_secondary    difmap
_atom_sites_solution_hydrogens    geom
_refine_ls_hydrogen_treatment     mixed
_refine_ls_extinction_method      none
_refine_ls_extinction_coef        ?
_refine_ls_number_reflns          4367
_refine_ls_number_parameters      258
_refine_ls_number_restraints      0
_refine_ls_R_factor_all           0.0484
_refine_ls_R_factor_gt            0.0293
_refine_ls_wR_factor_ref          0.0676
_refine_ls_wR_factor_gt           0.0613
_refine_ls_goodness_of_fit_ref    1.038
_refine_ls_restrained_S_all       1.038
_refine_ls_shift/su_max           0.013
_refine_ls_shift/su_mean          0.000
 
loop_
 _atom_site_label
 _atom_site_type_symbol
 _atom_site_fract_x
 _atom_site_fract_y
 _atom_site_fract_z
 _atom_site_U_iso_or_equiv
 _atom_site_adp_type
 _atom_site_occupancy
 _atom_site_symmetry_multiplicity
 _atom_site_calc_flag
 _atom_site_refinement_flags
 _atom_site_disorder_assembly
 _atom_site_disorder_group
Sn1 Sn 0.46095(4) 0.38091(2) 1.057459(14) 0.04301(9) Uani 1 1 d . . .
Sn2 Sn 0.32592(4) 0.26651(2) 0.858941(15) 0.04842(10) Uani 1 1 d . . .
Mn1 Mn 0.14111(9) 0.16852(6) 0.34115(3) 0.05672(18) Uani 1 1 d . . .
O2 O 0.3385(4) 0.2046(2) 0.98353(15) 0.0586(7) Uani 1 1 d . . .
O3 O 0.3878(4) 0.4013(3) 0.77432(15) 0.0696(8) Uani 1 1 d . . .
O4 O 0.2473(5) 0.2473(3) 0.67999(17) 0.0821(10) Uani 1 1 d . . .
O1 O 0.4433(4) 0.4187(2) 0.93935(14) 0.0562(7) Uani 1 1 d . . .
C7 C 0.0258(7) 0.1132(4) 0.2438(3) 0.0722(13) Uani 1 1 d . . .
C6 C 0.0873(8) 0.3344(5) 0.3398(3) 0.0782(14) Uani 1 1 d . . .
O5 O 0.5243(6) 0.2362(4) 0.5161(2) 0.1047(13) Uani 1 1 d . . .
C15 C 0.2286(6) 0.4140(4) 1.1334(3) 0.0695(12) Uani 1 1 d . . .
H15A H 0.1253 0.4404 1.1019 0.104 Uiso 1 1 calc R . .
H15B H 0.2639 0.4825 1.1786 0.104 Uiso 1 1 calc R . .
H15C H 0.1903 0.3340 1.1544 0.104 Uiso 1 1 calc R . .
C5 C 0.2612(8) 0.0434(4) 0.4185(2) 0.0704(13) Uani 1 1 d . . .
H5 H 0.3878 0.0097 0.4133 0.084 Uiso 1 1 calc R . .
C12 C 0.3355(7) 0.3535(4) 0.6989(2) 0.0646(12) Uani 1 1 d . . .
C11 C 0.3922(7) 0.4391(4) 0.6364(2) 0.0757(14) Uani 1 1 d . . .
H11A H 0.5286 0.4407 0.6311 0.091 Uiso 1 1 calc R . .
H11B H 0.3589 0.5288 0.6552 0.091 Uiso 1 1 calc R . .
O7 O -0.0528(6) 0.0732(4) 0.1818(2) 0.1071(13) Uani 1 1 d . . .
C8 C 0.3652(7) 0.1970(4) 0.2978(3) 0.0690(13) Uani 1 1 d . . .
O8 O 0.5119(6) 0.2159(3) 0.2720(3) 0.1081(13) Uani 1 1 d . . .
C9 C 0.3598(8) 0.2611(5) 0.5128(2) 0.0680(13) Uani 1 1 d . . .
C10 C 0.2965(8) 0.3905(4) 0.5528(2) 0.0780(14) Uani 1 1 d . . .
H10A H 0.1606 0.3821 0.5593 0.094 Uiso 1 1 calc R . .
H10B H 0.3221 0.4561 0.5167 0.094 Uiso 1 1 calc R . .
O6 O 0.0514(7) 0.4436(4) 0.3407(2) 0.1221(15) Uani 1 1 d . . .
C13 C 0.5103(7) 0.1220(4) 0.8132(3) 0.0819(14) Uani 1 1 d . . .
H13A H 0.5061 0.1106 0.7540 0.123 Uiso 1 1 calc R . .
H13B H 0.4720 0.0397 0.8314 0.123 Uiso 1 1 calc R . .
H13C H 0.6372 0.1496 0.8334 0.123 Uiso 1 1 calc R . .
C3 C -0.0541(8) 0.0562(6) 0.4053(3) 0.0901(18) Uani 1 1 d . . .
H3 H -0.1879 0.0332 0.3896 0.108 Uiso 1 1 calc R . .
C1 C 0.2172(7) 0.1658(4) 0.4666(2) 0.0604(11) Uani 1 1 d . . .
C14 C 0.0289(6) 0.2662(5) 0.8578(3) 0.0800(14) Uani 1 1 d . . .
H14A H -0.0092 0.3273 0.9037 0.120 Uiso 1 1 calc R . .
H14B H -0.0239 0.1789 0.8621 0.120 Uiso 1 1 calc R . .
H14C H -0.0158 0.2921 0.8072 0.120 Uiso 1 1 calc R . .
C4 C 0.0966(10) -0.0203(5) 0.3814(3) 0.0903(18) Uani 1 1 d . . .
H4 H 0.0870 -0.1061 0.3457 0.108 Uiso 1 1 calc R . .
C2 C 0.0186(7) 0.1707(5) 0.4583(3) 0.0750(14) Uani 1 1 d . . .
H2 H -0.0566 0.2404 0.4859 0.090 Uiso 1 1 calc R . .
C16 C 0.7164(6) 0.3046(4) 1.0886(3) 0.0765(13) Uani 1 1 d . . .
H16A H 0.7853 0.2805 1.0394 0.115 Uiso 1 1 calc R . .
H16B H 0.6903 0.2280 1.1149 0.115 Uiso 1 1 calc R . .
H16C H 0.7908 0.3705 1.1257 0.115 Uiso 1 1 calc R . .
C17M C 0.2561(8) 0.0929(4) 1.0106(3) 0.0908(17) Uani 1 1 d . . .
H17A H 0.3165 0.0810 1.0619 0.136 Uiso 1 1 calc R . .
H17B H 0.2713 0.0168 0.9700 0.136 Uiso 1 1 calc R . .
H17C H 0.1236 0.1035 1.0186 0.136 Uiso 1 1 calc R . .
 
loop_
 _atom_site_aniso_label
 _atom_site_aniso_U_11
 _atom_site_aniso_U_22
 _atom_site_aniso_U_33
 _atom_site_aniso_U_23
 _atom_site_aniso_U_13
 _atom_site_aniso_U_12
Sn1 0.05220(18) 0.03717(16) 0.03804(15) 0.00600(11) -0.00293(12) -0.00924(12)
Sn2 0.05710(19) 0.03895(16) 0.04362(16) -0.00585(11) -0.00573(13) -0.00974(13)
Mn1 0.0719(5) 0.0574(4) 0.0392(3) 0.0071(3) 0.0026(3) -0.0091(3)
O2 0.079(2) 0.0424(15) 0.0510(16) 0.0073(12) -0.0061(14) -0.0216(14)
O3 0.107(2) 0.0587(18) 0.0371(15) -0.0002(13) -0.0118(15) -0.0230(16)
O4 0.117(3) 0.067(2) 0.0537(18) 0.0000(15) -0.0151(18) -0.035(2)
O1 0.092(2) 0.0373(14) 0.0339(13) 0.0018(11) -0.0115(13) -0.0251(14)
C7 0.100(4) 0.059(3) 0.058(3) 0.017(2) -0.003(3) -0.011(3)
C6 0.097(4) 0.081(4) 0.056(3) 0.006(3) 0.019(3) 0.007(3)
O5 0.080(3) 0.124(3) 0.098(3) -0.023(2) -0.017(2) 0.008(2)
C15 0.061(3) 0.067(3) 0.080(3) 0.010(2) 0.015(2) 0.001(2)
C5 0.099(4) 0.063(3) 0.049(2) 0.011(2) -0.006(3) 0.000(3)
C12 0.088(3) 0.055(3) 0.044(2) -0.004(2) -0.008(2) -0.017(2)
C11 0.114(4) 0.063(3) 0.043(2) 0.001(2) -0.004(2) -0.023(3)
O7 0.153(4) 0.098(3) 0.064(2) 0.0128(19) -0.043(2) -0.025(2)
C8 0.083(4) 0.055(3) 0.068(3) 0.008(2) 0.011(3) -0.003(3)
O8 0.104(3) 0.081(3) 0.139(3) 0.010(2) 0.056(3) -0.005(2)
C9 0.084(4) 0.076(3) 0.041(2) 0.005(2) -0.007(2) -0.004(3)
C10 0.116(4) 0.069(3) 0.046(2) 0.004(2) -0.008(3) 0.001(3)
O6 0.171(4) 0.086(3) 0.116(3) 0.015(2) 0.043(3) 0.043(3)
C13 0.077(3) 0.072(3) 0.092(4) -0.007(3) 0.012(3) 0.015(3)
C3 0.093(4) 0.119(5) 0.056(3) 0.032(3) -0.011(3) -0.053(4)
C1 0.074(3) 0.069(3) 0.038(2) 0.009(2) 0.003(2) -0.002(2)
C14 0.060(3) 0.081(3) 0.096(4) 0.005(3) -0.008(3) 0.008(3)
C4 0.140(6) 0.071(4) 0.058(3) 0.022(3) -0.010(3) -0.035(4)
C2 0.083(4) 0.098(4) 0.045(3) 0.017(2) 0.014(2) -0.008(3)
C16 0.058(3) 0.083(4) 0.089(3) 0.013(3) -0.008(3) 0.015(3)
C17M 0.127(5) 0.059(3) 0.084(3) 0.022(3) -0.001(3) -0.040(3)
 
_geom_special_details
;
 All esds (except the esd in the dihedral angle between two l.s. planes)
 are estimated using the full covariance matrix.  The cell esds are taken
 into account individually in the estimation of esds in distances, angles
 and torsion angles; correlations between esds in cell parameters are only
 used when they are defined by crystal symmetry.  An approximate (isotropic)
 treatment of cell esds is used for estimating esds involving l.s. planes.
;
 
loop_
 _geom_bond_atom_site_label_1
 _geom_bond_atom_site_label_2
 _geom_bond_distance
 _geom_bond_site_symmetry_2
 _geom_bond_publ_flag
Sn1 O1 2.030(2) . ?
Sn1 C16 2.093(4) . ?
Sn1 C15 2.099(4) . ?
Sn1 O1 2.115(2) 2_667 ?
Sn1 O2 2.143(2) . ?
Sn2 O1 2.010(2) . ?
Sn2 C14 2.100(5) . ?
Sn2 C13 2.101(4) . ?
Sn2 O3 2.129(3) . ?
Sn2 O2 2.225(2) . ?
Mn1 C6 1.767(6) . ?
Mn1 C7 1.773(5) . ?
Mn1 C8 1.778(5) . ?
Mn1 C1 2.116(4) . ?
Mn1 C2 2.121(4) . ?
Mn1 C5 2.128(4) . ?
Mn1 C3 2.136(5) . ?
Mn1 C4 2.141(5) . ?
O2 C17M 1.387(4) . ?
O3 C12 1.297(4) . ?
O4 C12 1.216(5) . ?
O1 Sn1 2.115(2) 2_667 ?
C7 O7 1.154(5) . ?
C6 O6 1.161(5) . ?
O5 C9 1.208(5) . ?
C5 C4 1.380(6) . ?
C5 C1 1.435(6) . ?
C12 C11 1.488(6) . ?
C11 C10 1.514(6) . ?
C8 O8 1.145(5) . ?
C9 C1 1.473(6) . ?
C9 C10 1.489(6) . ?
C3 C4 1.391(7) . ?
C3 C2 1.414(7) . ?
C1 C2 1.413(6) . ?
 
loop_
 _geom_angle_atom_site_label_1
 _geom_angle_atom_site_label_2
 _geom_angle_atom_site_label_3
 _geom_angle
 _geom_angle_site_symmetry_1
 _geom_angle_site_symmetry_3
 _geom_angle_publ_flag
O1 Sn1 C16 114.00(15) . . ?
O1 Sn1 C15 119.13(15) . . ?
C16 Sn1 C15 126.84(18) . . ?
O1 Sn1 O1 73.50(10) . 2_667 ?
C16 Sn1 O1 99.21(15) . 2_667 ?
C15 Sn1 O1 97.16(14) . 2_667 ?
O1 Sn1 O2 73.01(9) . . ?
C16 Sn1 O2 97.08(15) . . ?
C15 Sn1 O2 96.26(15) . . ?
O1 Sn1 O2 146.36(10) 2_667 . ?
O1 Sn2 C14 110.82(16) . . ?
O1 Sn2 C13 115.67(17) . . ?
C14 Sn2 C13 132.04(19) . . ?
O1 Sn2 O3 81.38(10) . . ?
C14 Sn2 O3 100.14(16) . . ?
C13 Sn2 O3 97.77(16) . . ?
O1 Sn2 O2 71.63(9) . . ?
C14 Sn2 O2 92.48(15) . . ?
C13 Sn2 O2 91.26(15) . . ?
O3 Sn2 O2 152.82(9) . . ?
C6 Mn1 C7 93.0(2) . . ?
C6 Mn1 C8 91.4(2) . . ?
C7 Mn1 C8 93.6(2) . . ?
C6 Mn1 C1 103.14(19) . . ?
C7 Mn1 C1 157.10(19) . . ?
C8 Mn1 C1 102.0(2) . . ?
C6 Mn1 C2 90.7(2) . . ?
C7 Mn1 C2 126.2(2) . . ?
C8 Mn1 C2 139.9(2) . . ?
C1 Mn1 C2 38.97(17) . . ?
C6 Mn1 C5 141.9(2) . . ?
C7 Mn1 C5 124.87(19) . . ?
C8 Mn1 C5 90.6(2) . . ?
C1 Mn1 C5 39.54(16) . . ?
C2 Mn1 C5 64.58(19) . . ?
C6 Mn1 C3 115.0(3) . . ?
C7 Mn1 C3 93.3(2) . . ?
C8 Mn1 C3 152.3(2) . . ?
C1 Mn1 C3 65.31(18) . . ?
C2 Mn1 C3 38.80(18) . . ?
C5 Mn1 C3 63.7(2) . . ?
C6 Mn1 C4 152.6(2) . . ?
C7 Mn1 C4 93.1(2) . . ?
C8 Mn1 C4 114.8(2) . . ?
C1 Mn1 C4 65.25(18) . . ?
C2 Mn1 C4 64.4(2) . . ?
C5 Mn1 C4 37.73(18) . . ?
C3 Mn1 C4 38.0(2) . . ?
C17M O2 Sn1 127.6(3) . . ?
C17M O2 Sn2 129.7(3) . . ?
Sn1 O2 Sn2 101.55(10) . . ?
C12 O3 Sn2 112.8(3) . . ?
Sn2 O1 Sn1 113.79(11) . . ?
Sn2 O1 Sn1 139.47(12) . 2_667 ?
Sn1 O1 Sn1 106.51(10) . 2_667 ?
O7 C7 Mn1 177.3(4) . . ?
O6 C6 Mn1 178.5(4) . . ?
C4 C5 C1 109.2(5) . . ?
C4 C5 Mn1 71.7(3) . . ?
C1 C5 Mn1 69.8(2) . . ?
O4 C12 O3 123.1(4) . . ?
O4 C12 C11 122.2(4) . . ?
O3 C12 C11 114.7(4) . . ?
C12 C11 C10 111.9(4) . . ?
O8 C8 Mn1 178.1(5) . . ?
O5 C9 C1 120.7(5) . . ?
O5 C9 C10 121.1(5) . . ?
C1 C9 C10 118.1(5) . . ?
C9 C10 C11 113.5(4) . . ?
C4 C3 C2 108.1(5) . . ?
C4 C3 Mn1 71.2(3) . . ?
C2 C3 Mn1 70.0(3) . . ?
C2 C1 C5 105.7(4) . . ?
C2 C1 C9 130.3(5) . . ?
C5 C1 C9 124.0(5) . . ?
C2 C1 Mn1 70.7(2) . . ?
C5 C1 Mn1 70.7(2) . . ?
C9 C1 Mn1 122.8(3) . . ?
C5 C4 C3 108.5(5) . . ?
C5 C4 Mn1 70.6(3) . . ?
C3 C4 Mn1 70.8(3) . . ?
C1 C2 C3 108.5(5) . . ?
C1 C2 Mn1 70.3(2) . . ?
C3 C2 Mn1 71.2(3) . . ?
 
_diffrn_measured_fraction_theta_max    0.998
_diffrn_reflns_theta_full              25.50
_diffrn_measured_fraction_theta_full   0.998
_refine_diff_density_max    0.498
_refine_diff_density_min   -0.375
_refine_diff_density_rms    0.102
